1           **Time-resolved proteomic profiling of the ciliary Hedgehog**  
2           **response reveals that GPR161 and PKA undergo regulated co-**  
3           **exit from cilia**

4  
5 Elena A. May<sup>1,#</sup>, Marian Kalocsay<sup>2,3,#</sup>, Inès Galtier D'Auriac<sup>4</sup>, Steven P. Gygi<sup>3</sup>, Maxence V.  
6 Nachury<sup>4,\*</sup> and David U. Mick<sup>1,5,\*</sup>

7  
8       1- Center of Human and Molecular Biology (ZHMB), Saarland University School of Medicine,  
9       Homburg, Germany

10       2- Department of Systems Biology, Laboratory of Systems Pharmacology, Harvard Medical  
11       School, Boston, Massachusetts, USA

12       3- Department of Cell Biology, Harvard Medical School, Boston, Massachusetts, USA

13       4- Department of Ophthalmology, University of California San Francisco, CA 94143, USA

14       5- Center for Molecular Signaling (PZMS), Department of Medical Biochemistry and Molecular  
15       Biology, Saarland University School of Medicine, Homburg, Germany

16  
17 # authors contributed equally

18  
19 \* Correspondence: maxence.nachury@ucsf.edu, david.mick@uks.eu

20  
21 Key words:

22 Primary Cilium, protein trafficking, proximity labeling, proteomics, hedgehog signaling

23

24 **ABSTRACT**

25 The primary cilium is a signaling compartment that interprets Hedgehog signals through changes of  
26 its protein, lipid and second messenger compositions. Here, we combine proximity labeling of cilia  
27 with quantitative mass spectrometry to unbiasedly profile the time-dependent alterations of the ciliary  
28 proteome in response to Hedgehog. This approach correctly identifies the three factors known to  
29 undergo Hedgehog-regulated ciliary redistribution and reveals two such additional proteins. First, we  
30 find that a regulatory subunit of the cAMP-dependent protein kinase (PKA) rapidly exits cilia together  
31 with the G protein-coupled receptor GPR161 in response to Hedgehog; and we propose that the  
32 GPR161/PKA module senses and amplifies cAMP signals to modulate ciliary PKA activity. Second,  
33 we identify the putative phosphatase Paladin as a cell type-specific regulator of Hedgehog signaling  
34 that enters primary cilia upon pathway activation. The broad applicability of quantitative ciliary  
35 proteome profiling promises a rapid characterization of ciliopathies and their underlying signaling  
36 malfunctions.

## 37 INTRODUCTION

38 The primary cilium is a solitary, microtubule-based protrusion of the cell that organizes  
39 developmental, sensory and homeostatic signaling pathways inside a functionally distinct  
40 compartment. Cilia defects cause multi-system pathologies named ciliopathies with symptoms  
41 including kidney cysts, retinal degeneration, obesity, brain malformations and skeletal anomalies  
42 (Reiter and Leroux, 2017; Hildebrandt et al., 2011). The vast range of symptoms underscores the  
43 broad physiological importance of cilium-based signaling. Our understanding of how cilia transduce  
44 signals is based in large part on studies of the developmental morphogen Hedgehog (Hh) (Gigante and  
45 Caspary, 2020; Anvarian et al., 2019; Kong et al., 2019). In vertebrates, Hh signaling is strictly  
46 dependent on an intact primary cilium. The core Hh machinery comprises the Hh receptor Patched  
47 (PTCH1), the G-protein coupled receptors (GPCR) GPR161 and Smoothed (SMO), and the GLI  
48 transcription factors, all of which dynamically localize to primary cilia in response to Hh (Fig. 1A).  
49 PTCH1 and GPR161, two molecules that restrain Hh pathway activation inside cilia in unstimulated  
50 cells, undergo ciliary exit upon pathway stimulation while the central pathway activator SMO becomes  
51 enriched inside cilia when activated. It has been proposed that PTCH1 pumps a lipidic activator of  
52 SMO out of the ciliary membrane and that the PTCH1 lipid extruder activity is directly suppressed  
53 upon liganding Hh. Ciliary exit of PTCH1 further reduces the inhibitory effect exerted by PTCH1 on  
54 SMO. Downstream of SMO and GPR161 lies the cAMP-dependent protein kinase (PKA) which  
55 phosphorylates GLI2 and GLI3 and commits them to processing into transcriptional repressors. It is  
56 now believed that it is the PKA activity within cilia that is important for transduction of Hh signals  
57 (Kong et al., 2019; Gigante and Caspary, 2020). SMO blocks PKA activity, either directly (Arveseth  
58 et al., 2020) or via its  $G\alpha_i$ -mediated inhibition of adenylyl cyclases (Riobo, 2014) and GPR161  
59 increases PKA activity within cilia via its tonic activation of adenylyl cyclases through  $G\alpha_s$ . By  
60 triggering the ciliary exit of GPR161, the accumulation of activated SMO in cilia thus results in a  
61 drastic decrease in ciliary PKA activity (Mukhopadhyay et al., 2013; Pusapati et al., 2018a), and a  
62 switch in the processing of the transcription factors GLI2/3 from repressor to activator forms. The  
63 dynamic redistribution of signaling molecules thus plays an integral part in the transduction of Hh  
64 signals inside the cilium. Despite the recognized importance of dynamic ciliary localization in the Hh  
65 response, the extent of ciliary proteome remodeling during Hh signaling remains unknown and several  
66 of the key steps remain incompletely characterized. For example, the exact mechanism of how ciliary  
67 SMO triggers the exit of GPR161 from cilia remains to be determined.

68 An unbiased, systematic description of the mammalian primary cilia proteome has proven  
69 challenging because the isolation of mammalian cilia remains fraught with severe limitations (Ishikawa

70 et al., 2012). To overcome this technical barrier, we previously established a proximity labeling-based  
71 method using cilia-localized ascorbate peroxidase (cilia-APEX) (Mick et al., 2015). Cilia-targeted  
72 APEX fusion proteins allow labeling of ciliary components with biotin-derivatives that are readily  
73 enriched by streptavidin chromatography (Mick et al., 2015; Kohli et al., 2017). Proteomics of cilia  
74 using cilia-APEX has contributed to our molecular understanding of Hh signaling (Mick et al., 2015),  
75 of extracellular vesicles shedding from cilia (Nager et al., 2017) and of regulated ciliary GPCR  
76 trafficking (Shinde et al., 2020). While APEX approaches in cilia have identified several ciliary  
77 signaling proteins (Mick et al., 2015; Kohli et al., 2017), they failed to robustly detect signaling proteins  
78 of high importance and low abundance, such as PTCH1, GPR161 and SMO. The scarcity of these  
79 factors in cilia combined with the high hydrophobicity of these multi-pass membrane proteins makes  
80 mass spectrometric analysis a considerable challenge. The limited sensitivity of cilia-APEX thus  
81 hampers a systematic and quantitative assessment of the proteomic changes in cilia in response to  
82 signals and other perturbations.

83 Here, we profile the changes of the ciliary proteome during Hh signaling in a systematic and  
84 time-resolved manner by combining improvements in the cilia-APEX2 proximity labeling scheme with  
85 state-of-the-art quantitative mass spectrometry using tandem-mass-tags (TMTs) (Paek et al., 2017).  
86 These technical advances enabled us to uncover the extent of the ciliary proteome remodeling in  
87 response to Hh ligand and gain novel mechanistic insights into Hh signaling.

88

## 89 **RESULTS AND DISCUSSION**

90

### 91 **The cilia-APEX2 expression system limits perturbations of ciliary dynamics**

92 To investigate why cilia-APEX had failed to identify ciliary membrane proteins of the Hh pathway,  
93 we surveyed the ciliary accumulation of these Hh signaling molecules by immunofluorescence  
94 microscopy in the inner medullary collecting duct (IMCD3) cell line stably expressing the cilia-APEX  
95 transgene (Fig. 1B). Surprisingly, while endogenous GPR161 was readily detected in cilia of parental  
96 IMCD3 cells, ciliary GPR161 was nearly undetectable in IMCD3-[cilia-APEX] cells (Figs. 1C and  
97 1D). The relatively high level of cilia-APEX expression required to support efficient biotinylation may  
98 have altered ciliary composition. Even though a weak promoter (pEF1 $\alpha$ ) was used to stably express  
99 cilia-APEX and expression was limited by integration at a defined genomic locus, we previously found  
100 that pEF1  $\alpha$ -driven expression of a ciliary GPCR from the same locus produced nearly 50,000  
101 molecules per cilium and led to a drastic lengthening of cilia (Ye et al., 2018).

102 We thus reduced expression levels of the transgene by switching to the truncated CMV( $\Delta$ 6)  
103 promoter (Morita et al., 2012), a considerably weaker promoter than pEF1  $\alpha$  (Ye et al., 2018). To



104 maintain robust biotinylation levels, we leveraged APEX2, an APEX variant with increased turnover  
105 rates (Lam et al., 2015). As for the original cilia-APEX, ciliary targeting was carried out by the N-  
106 terminus of Nphp3 (Wright et al., 2011; Nakata et al., 2012), and the presence of a GFP moiety in both  
107 cilia-APEX and cilia-APEX2 allowed us to compare their relative abundance (Fig. 1B). The total levels  
108 of cilia-APEX2 were reduced nearly 5-fold compared to cilia-APEX in the respective cell lines (Figs.  
109 1E and 1F) while the abundance of the ciliary protein IFT88 was not affected (Figs. 1E and S1A).  
110 Congruently, the ciliary intensity of cilia-APEX2 was reduced about 5-fold compared to cilia-APEX  
111 (Figs. 1G and 1H). Despite the drastic reduction in ciliary abundance of cilia-APEX2 compared to  
112 cilia-APEX, ciliary biotinylation efficiency in the presence of the APEX substrates biotin tyramide and  
113 H<sub>2</sub>O<sub>2</sub> nearly doubled in cilia-APEX2 compared to cilia-APEX (Figs. 1G and 1I). Importantly, the  
114 ciliary abundance of GPR161 was nearly indistinguishable between parental and cilia-APEX2 cells  
115 (Figs. 1C and 1D). Furthermore, GPR161 was efficiently removed from cilia in response to Hh  
116 pathway activation by Sonic Hedgehog (Shh) in the cilia-APEX2 cell line, confirming that the IMCD3-  
117 [cilia-APEX2] cell line recapitulates the physiological ciliary dynamics of the Hh signaling molecules  
118 in response to Hh pathway activation. Together, these results predict that cilia-APEX2 improves  
119 sensitivity of ciliary proteomics while minimizing perturbations of ciliary protein dynamics.

120

## 121 **Tandem mass tag analyses of cilia-APEX2 samples extend coverage of the ciliary** 122 **proteome**

123 We next sought to compare the performance of cilia-APEX2 to that of cilia-APEX in quantitative  
124 mass spectrometric analysis. After labeling, biotinylated proteins were isolated via streptavidin  
125 chromatography and quantified by tandem mass tag labeling and mass-spectrometry. In addition to  
126 proteins biotinylated by the APEX enzyme, we expected streptavidin enrichment of several  
127 endogenously biotinylated proteins as well as proteins biotinylated by endogenous peroxidases during  
128 the labeling reaction. To discriminate proteins directly labeled by cilia-APEX2 from other biotinylated  
129 proteins, we leveraged several controls. First, we introduced a single amino acid substitution in the  
130 myristoylation site of the Nphp3-based ciliary targeting signal to abolish cilia targeting (Wright et al.,  
131 2011; Nakata et al., 2012), thus establishing control-APEX2. Expressed from the same locus and  
132 promoter as cilia-APEX2, control-APEX2 identifies the proteins labeled by the cilia-APEX2 molecules  
133 that did not reach the cilium (e.g. biogenesis intermediates). Secondly, to further control for non-ciliary  
134 proteins, in particular membrane proteins that may not be labeled by control-APEX2 (a soluble  
135 protein), we genetically ablated cilia in the cilia-APEX2 cell line by disrupting the centriole distal  
136 appendage protein CEP164 using CRISPR/Cas9-mediated genome editing (Fig. S1B). Basal bodies  
137 cannot dock to the plasma membrane in the absence of CEP164, thus precluding cilium assembly

138 without effecting other cellular processes (Daly et al., 2016; Tanos et al., 2013). *Cep164*<sup>-/-</sup> IMCD3-  
139 [cilia-APEX2] cells lack cilia (Fig. S1C-D) while retaining expression of the identical fusion protein  
140 that is used to label ciliary proteins in wild-type cells.

141 We conducted synchronous precursor selection MS/MS/MS (MS<sup>3</sup>) analyses of APEX-labeled  
142 samples from WT cilia-APEX2, *Cep164*<sup>-/-</sup> cilia-APEX2, and control-APEX2 cell lines in triplicate after  
143 streptavidin capture and tandem mass tag (TMT) labeling of tryptic peptides (Fig. 2A). The TMT  
144 isobaric tagging approach enables precise and reproducible quantification of the relative protein  
145 abundances in different samples (Liu et al., 2020; Paek et al., 2017; Li et al., 2020). Hierarchical  
146 clustering of each protein's relative abundance in the ten samples analyzed within one multiplex  
147 experiment demonstrates the high reproducibility of the triplicate experiment (Fig. S1E). Proteins that  
148 are highly enriched in the cilia-APEX2 data set compared to the controls form two clusters of candidate  
149 ciliary proteins (Fig. S1E and Fig. 2B) while non-ciliary proteins fall into separate clusters (Fig. S1F).  
150 We defined the cilia-APEX2 proteome via statistical analyses of the relative enrichment between the  
151 cilia-APEX2 samples and the controls (Fig. 2C and 2D). To be included in the cilia-APEX2 proteome,  
152 proteins had to fulfill four criteria (Figs. 2C-D, blue dots): greater than 2-fold enrichments in the cilia-  
153 APEX2 samples over control-APEX2 samples and over the *Cep164*<sup>-/-</sup> cilia-APEX2 samples (TMT ratio  
154 > 2.0), and statistically significant enrichments in the cilia-APEX2 samples vs. the control-APEX2  
155 samples and the *Cep164*<sup>-/-</sup> cilia-APEX2 samples (p-value < 0.05). In addition, proteins that fulfilled  
156 only 3 out of 4 criteria (Figs. 2C-D, black dots) were included if they were close to matching the fourth  
157 criterion (TMT ratio > 1.5, or p-value < 0.1). This set of criteria resulted in the inclusion of 203  
158 proteins (Table S1) and represents a compromise between inclusion of false positives and exclusion of  
159 false negatives (Fig. 2C-D). It should be noted that these criteria select for proteins significantly  
160 enriched in cilia and ciliary proteins that are found at similar levels inside and outside of cilia will be  
161 excluded from the cilia-APEX2 proteome.

162 To extend the coverage of the cilia-APEX2 method, we leveraged two additional independent  
163 experiments where the cilia-APEX2 *Cep164*<sup>-/-</sup> control was replaced by a no labeling control. We  
164 grouped the resulting candidate cilia proteins into two tiers, depending upon whether they were  
165 identified in all three datasets (Tier 1) or missing from one of the three datasets (Tier 2; Table S2).  
166 Application of these criteria resulted in the inclusion of 179 proteins in tier 1 and 91 proteins in Tier  
167 2. While cilia-APEX had identified 75% of the IFT motor subunits, 60% of the IFT subunits and none  
168 of the BBSome subunits (Mick et al., 2015), the cilia-APEX2 proteome comprises nearly all subunits  
169 of the IFT motors kinesin-2 and dynein 2, of the IFT complexes and of the BBSome. (Fig. 2E). Most  
170 of the subunits that were not identified –e.g. BBS18 and LC8 – were less than 10 kDa and likely to be  
171 missed by MS because of the small number of tryptic peptides produced (Fig. 2E). Unexpectedly, half

172 of the currently known components of the transition zone (TZ) were identified as hits in in the cilia-  
173 APEX2 proteome. The TZ acts as a diffusion barrier that functionally separates the cilium from the  
174 rest of the cell and was initially considered to be a static structure of the ciliary base (Garcia-Gonzalo  
175 and Reiter, 2017; Gonçalves and Pelletier, 2017). The notion of a static TZ was further reinforced by  
176 the near absence of TZ components from prior ciliary APEX studies (Mick et al., 2015; Kohli et al.,  
177 2017). However, recent studies have revealed that, while some TZ components are static, other TZ  
178 components dynamically cycle between the TZ and the cytoplasm or the ciliary shaft (Nachury and  
179 Mick, 2019) It is particularly striking to note that TZ components with previously documented  
180 dynamicity (e.g. Nphp4 and Cep290) were identified by cilia-APEX2 while TZ components that  
181 remain statically associated with the TZ over the timescale of tens of minutes (e.g. MKS2 and  
182 TMEM107) were missing from the cilia-APEX2 proteome. It is also conceivable that some TZ  
183 components identified by cilia-APEX2 are positioned at the distal side of the TZ, and hence in close  
184 proximity to the cilia-APEX2 enzyme to be labeled by biotinyl radicals. This latter hypothesis is  
185 consistent with an extension of the TZ proteins NPHP3, INVS, NEK8 into the inversin compartment  
186 that spreads from the TZ to the first few  $\mu\text{m}$  of the ciliary shaft.

187 Most importantly, cilia-APEX2 combined with TMT labeling enabled previously unachievable  
188 identification of central cilia-enriched signaling components, including most Hh signaling components  
189 known to localize to cilia (PTCH1, SMO, GPR161, KIF7, SUFU and GLI3). The Hh transcription  
190 factor GLI1 was not identified by cilia-APEX2, consistent with undetectable GLI1 expression in the  
191 absence of Hh pathway stimulation and GLI2 could only be quantified in one (out of three)  
192 experiments, possibly because of its low abundance in IMCD3 cells.

193

### 194 **Time-resolved cilia-APEX2 proteomics reveals global alterations of the cilia proteome** 195 **in response to Hh stimulation**

196 Encouraged by the detection of the core Hh signaling machinery by cilia-APEX2, we sought  
197 to determine the global changes of the cilia proteome in response to Hh by subjecting cells exposed to  
198 Sonic Hedgehog (Shh) for 0, 1, 4 or 24 h to the cilia-APEX2/TMT workflow (Fig. 3A). The duplicate  
199 experimental repeats showed high reproducibility as judged by hierarchical cluster analysis of relative  
200 protein abundances (Fig. S2A). Strikingly, comparison of the cilia-APEX2 proteomes at 0 and 24 h  
201 post-Shh treatment revealed only a handful proteins with significantly changed abundance (TMT ratio  
202  $> 2$ -fold) (Fig. 3B). Out of the 272 quantified cilia proteins (Table S2), 267 did not experience significant  
203 changes in abundance (TMT ratio  $< 2.0$ ) after 24 h of Shh ligand addition. For example, the  
204 normalized protein abundance of the cilia trafficking components IFT88 or BBS1 (components of the  
205 IFT-B and BBSome protein complexes, respectively), or of other known cilia proteins, such as the

206 inositol polyphosphate 5-phosphatase (INPP5E) or Polycystin-2 (PKD2) displayed no significant  
207 change over the course of a 24 h treatment with Shh (Fig. 4A). The low variability in relative  
208 abundances of >95% of the ciliary proteome between different time points highlights the robust and  
209 reproducible quantitation enabled by cilia-APEX2/TMT.

210 Importantly, cilia-APEX2/TMT profiling detected changes in ciliary abundance of the three  
211 Hh signaling components known to undergo signal-dependent redistribution in or out of cilia (Fig. 4B).  
212 Levels of the Hh receptor PTCH1 and the GPCR GPR161 decreased while SMO increased within 4  
213 h after pathway activation. The kinetics revealed by cilia-APEX2 closely matched the kinetics  
214 previously defined by immunofluorescence microscopy (Rohatgi et al., 2007; Mukhopadhyay et al.,  
215 2013). While the transcription factors GLI2 and GLI3, the GLI chaperone SUFU and the GLI  
216 regulator KIF7 become enriched at the tip of cilia in response to Hh (Wen et al., 2010; Tukachinsky  
217 et al., 2010; Endoh-Yamagami et al., 2009; Liem et al., 2009), the cilia-APEX2 signals for GLI2, GLI3  
218 and KIF7 increased by less than 20% and the cilia-APEX2 signal for SUFU did not change during the  
219 time course of Shh treatment. We note that while GLI2 failed the stringent inclusion criteria for the  
220 cilia-APEX2 proteome, cilia-APEX2/TMT successfully quantified peptides in the 24 h time course  
221 experiment. These findings suggest that the total ciliary amounts of GLI2, GLI3, KIF7 and SUFU  
222 may not change significantly in response to Hh signal and that these factors may undergo subciliary  
223 re-distribution, *i.e.* mobilization of a broadly distributed ciliary pool to the tip. Similarly, while the  
224 BBSome becomes enriched at the tip of cilia upon Hh pathway activation (Ye et al., 2018), cilia-  
225 APEX2 signals of BBSome subunits do not change appreciably during the 24 h time course.

226 Since the ciliary changes of PTCH1, SMO and GPR161 were nearly complete after only 1h  
227 of pathway activation, we sought to resolve the changes in proteome remodeling during the first 60  
228 min after Shh addition (see Fig. S3). While housekeeping ciliary proteins remained largely unchanged,  
229 the high temporal resolution and precise TMT-based quantitation of cilia-APEX2 profiling enabled a  
230 refined characterization of the redistribution of Hh signaling components (Fig. 4C). The levels of the  
231 Hh receptor PTCH1 in cilia started dropping 5 min after Shh addition and reached a minimum after  
232 30 min. Meanwhile, ciliary levels of SMO steadily increased during the 60 min time course and until  
233 the 4 h time point (Fig. 4B). The removal of GPR161 was preceded by an increase in ciliary  $\beta$ -  
234 arrestin2 levels (Fig. 4C), consistent with the proposed role of  $\beta$ -arrestin2 in triggering signal  
235 dependent exit of GPR161 from cilia (Pal et al., 2016).

236 To determine if any other proteins besides SMO, PTCH1 and GPR161 undergo changes in  
237 ciliary abundance in response to Shh, we searched for proteins that co-clustered with SMO, PTCH1  
238 or GPR161 during the 24h time course in a hierarchical two-way cluster analysis. Only one protein

239 clustered closely with SMO (Fig. 5A), the putative phosphatase Paladin which displayed kinetics of  
240 ciliary accumulation closely mirroring those of SMO (Fig. 4B). It should be noted that despite tight  
241 clustering of PKD1 and GLI2, the PKD1/GLI2 cluster sits at a substantial distance from the  
242 SMO/PALD1 mini-cluster (Fig. 5A). Similarly, hierarchical clustering revealed only one tight cluster  
243 of proteins disappearing from cilia in response to Shh (Fig. 5B). This cluster contained GPR161,  
244 PTCH1 and the PKA regulatory subunit I  $\alpha$  (PKA-RI  $\alpha$ ), all of which nearly reached their minimum  
245 within the first hour of pathway induction (Fig. 4B). As observed in the 24 h time course, the ciliary  
246 exit kinetics of GPR161 and PKA-RI  $\alpha$  were nearly identical in the 60 min time course (Fig. 4C).

247 Thus, cilia-APEX2/TMT not only detects known changes in remodeling of the ciliary  
248 proteome in response to Hh, the systematic nature of the TMT platform enables discovery of novel  
249 dynamic factors, co-enriched and co-depleted with known components, via kinetic profiling.

250

### 251 **Time-resolved cilia-APEX2/TMT illuminates the mechanisms of regulated GPR161** 252 **removal from cilia**

253 Consistent with the current models of Hh signal transduction that predict a drop in PKA-  
254 mediated phosphorylation of GLI3 inside cilia upon Hh pathway activation, biosensor-based  
255 measurements showed that ciliary PKA activity decreases in response to Hh (Moore et al., 2016). Yet,  
256 our understanding of how ciliary PKA activity becomes depressed upon Hh pathway activation  
257 remains incomplete. On one hand, GPR161, a tonically active G  $\alpha_s$ -coupled GPCR (G<sub>s</sub>PCR), is  
258 thought to maintain high cAMP levels in cilia of unstimulated cells. Ciliary exit of GPR161 will thus  
259 lead to a decrease of active G  $\alpha_s$  in cilia and a corresponding decrease of ciliary cAMP levels. On the  
260 other hand, the regulatory PKA subunit PKA-RI  $\alpha$ , a stoichiometric inhibitor of the kinase-bearing  
261 catalytic PKA subunit PKA-C (Taylor et al., 2012, 201), is found inside cilia (Mick et al., 2015;  
262 Bachmann et al., 2016). PKA-RI  $\alpha$  is thus thought to constitutively repress PKA activity inside cilia.  
263 To validate the unexpected finding that PKA-RI  $\alpha$  may exit cilia upon Hh pathway activation, we  
264 established a stable IMCD3 cell line that expresses PKA-RI  $\alpha$  fused to the fluorescent protein  
265 mNeonGreen (NG; (Shaner et al., 2013)) and imaged <sup>NG</sup>PKA-RI  $\alpha$  by fluorescence microscopy. While  
266 unstimulated cells exhibited robust ciliary signals of <sup>NG</sup>PKA-RI  $\alpha$ , addition of Shh triggered a decrease  
267 of <sup>NG</sup>PKA-RI  $\alpha$  ciliary fluorescence with kinetics that mirrored those measured by cilia-APEX2/TMT  
268 profiling (Figs. 5C and 5D). To pinpoint the step in the pathway that triggers the removal of PKA-RI $\alpha$   
269 from cilia, we directly activated SMO via the SMO agonist SAG (Figs. S2B and S2C). The kinetics of



270 <sup>NG</sup>PKA-RI  $\alpha$  exit from cilia were nearly identical in cells treated with Shh or SAG and we conclude  
271 that PKA-RI  $\alpha$  exit from cilia lies downstream of SMO activation.

272 In agreement with our cluster analysis (Fig. 5B), the kinetics of <sup>NG</sup>PKA-RI $\alpha$  removal from cilia  
273 upon Hh pathway activation were closely reminiscent of the exit kinetics of GPR161 (Mukhopadhyay  
274 et al., 2013), which we confirmed by imaging of GPR161<sup>NG</sup> (Nager et al., 2017) (Figs. 5E, 5F, S2D).  
275 The concomitant exit of GPR161 and PKA-RI $\alpha$  raises the possibility that PKA-RI $\alpha$  piggybacks onto  
276 GPR161 to exit cilia. In support of this hypothesis, the cytoplasmic tail of GPR161 harbors an atypical  
277 A kinase anchoring protein (AKAP) motif with exquisite and unprecedented specificity for PKA-RI $\alpha$   
278 (Bachmann et al., 2016). A major function of the 60 different AKAP is to recruit that the PKA  
279 regulatory subunits at discrete cellular locations to direct the catalytic subunits to their substrates  
280 (Torres-Quesada et al., 2017). We conclude that GPR161 and PKA-RI $\alpha$  form a stable complex that  
281 represents a functional unit, most likely together with PKA-C. Meanwhile, the abundances of other  
282 AKAPs quantified in the cilia-APEX2 dataset, e.g. AKAP11 and AKAP9, did not change appreciably  
283 in response to Hh (Fig. S2E).

284 A remarkable feature of the C-terminal tail of GPR161 is that it encodes both an AKAP motif  
285 for PKA-RI $\alpha$  and a PKA phosphorylation consensus site (Bachmann et al., 2016). In most studied  
286 instances, AKAPs interact directly with the PKA substrates (Musheshe et al., 2018) and GPR161 may  
287 further reduce the complexity of PKA recruitment to its substrate by encoding an AKAP motif within  
288 its sequence rather than interact with a separate AKAP. Because phosphomimetic mutations of the  
289 PKA site in the C-tail of GPR161 drastically reduce ciliary levels of GPR161 (Bachmann et al., 2016),  
290 we hypothesized that PKA-RI $\alpha$  promotes phosphorylation of GPR161 by PKA in response to Hh  
291 pathway activation and thus triggers ciliary exit of GPR161. To test this hypothesis, we assessed the  
292 Hh-induced removal of GPR161 from cilia after siRNA-mediated depletion of PKA-RI $\alpha$ . While  
293 control siRNA did not interfere with GPR161<sup>NG</sup> exit, GPR161<sup>NG</sup> failed to exit cilia in response to Hh  
294 signal in PKA-RI $\alpha$ -depleted cells (Fig. 5G). It is thus conceivable that the retention of GPR161 in cilia  
295 contributes to the previously reported defects in Hh pathway activation in cells depleted of PKA-RI $\alpha$   
296 (Evangelista et al., 2008). A major conundrum then lies in how Hh pathway activation may control the  
297 PKA-RI $\alpha$ -dependent phosphorylation of the GPR161 C-tail. In the test tube, PKA regulatory subunits  
298 inhibit the activity of the catalytic subunits until the regulatory subunits bind cAMP and release free  
299 and active PKA-C. Here, recent findings that intermediate concentrations of cAMP promote PKA  
300 activation without dissociation of catalytic from regulatory subunits (Smith et al., 2017) may shed light  
301 on the regulation of GPR161 C-tail phosphorylation. While few measurements of [cAMP]<sub>cilia</sub> have  
302 been published, one study found that [cAMP]<sub>cilia</sub> is about 4  $\mu$ M in unstimulated cells (Moore et al.,

2016), a concentration sufficient to trigger nearly complete PKA-C/PKA-R dissociation within cilia. Under these circumstances, PKA-C will freely diffuse in the cilium and phosphorylate GLI2/3 and other substrates (Fig. 5H, left). Because SMO entry into cilia is already detectable at the onset of GPR161 exit (Fig. 4C), we consider the ciliary state where GPR161 and activated SMO co-exist inside cilia. We propose that the activation of  $G\alpha_i$  by SMO inside cilia will reduce  $[cAMP]_{cilia}$  to a level where an active PKA holoenzyme assembles on the C-tail of GPR161 and phosphorylates GPR161 (Fig. 5H, center). This hypothesis of ciliary  $G\alpha_i$  activation promoting phosphorylation of the C-tail of GPR161 and subsequent exit of GPR161 is supported by our previously published and yet to be explained finding that activation of the ciliary  $G_i$ PCR SSTR3 leads the exit of GPR161 from cilia (Ye et al., 2018). The ultimate exit of the GPR161/PKA-RI $\alpha$ /PKA-C complex (Fig. 5H, right) further amplifies the effect of ciliary  $G\alpha_i$  activation via SMO to fully depress  $[cAMP]_{cilia}$  to a level where GLI2/3 no longer become phosphorylated by PKA. Similar to Hh ligands dually inhibiting ciliary PTCH1 by blocking its transporter activity and promoting its exit from cilia, our model proposes that PKA activity in cilia is reduced via a two-pronged mechanism that lowers cAMP levels and removes the PKA holoenzyme from cilia. Consistent with the observation that PKA-RI $\alpha$  is required for pathway activation in response to Smoothened agonist (Evangelista et al., 2008), our model predicts that PKA-C will remain in cilia of Hh-stimulated cells in the absence of PKA-RI $\alpha$ , leading to the continued production of Gli3<sup>R</sup>.

This model of regulated GPR161 exit resolves another conundrum raised by [Pal 2016]. Multiple groups have found that  $\beta$ -arrestin2 is required for exit of GPR161 from cilia subsequent to entry of activated Smoothened into cilia. Consistent with the cilia-APEX2/TMT profile of  $\beta$ -arrestin2 in response to Shh (Fig. 4C), recent imaging studies found that the ciliary levels of  $\beta$ -arrestin2 rapidly increase upon Hh pathway activation and reach a plateau at 20 min (Shinde et al., 2020). Interestingly,  $\beta$ -arrestin2 is also recruited to cilia upon activation of the ciliary GPCR SSTR3 and  $\beta$ -arrestin2 is required for removal of activated GPCRs from cilia (Green et al., 2015; Pal et al., 2016; Ye et al., 2018). Because  $\beta$ -arrestins are rapidly and stably recruited to activated GPCRs after they become phosphorylated, these results suggest that  $\beta$ -arrestin2 recognizes phosphorylated GPR161 inside cilia and instructs the ciliary export machinery to remove GPR161 from cilia. However, GPR161 was shown to be tonically active in the absence of Hh pathway stimulation (Mukhopadhyay et al., 2013). The model proposed in Fig. 5H solves this conundrum as it parsimoniously accounts for increased recruitment of  $\beta$ -arrestin2 to GPR161 when the entry of SMO into cilia promotes PKA-mediated phosphorylation of GPR161 C-tail. Our model also suggests that GPR161 may represent the first instance of a GPCR that is not controlled by extracellular ligands but instead monitors intracellular changes in second messenger concentrations. The GPR161/PKA-RI $\alpha$  module may thus act as a

337 simple amplifier of the state of ciliary SMO activity. Considering the very recent finding that SMO  
338 can directly regulate PKA-C (Arveseth et al., 2020), our model of regulated GPR161 exit may become  
339 further refined as new details of cAMP regulation by SMO and GPR161 emerge.

340 While our model accounts for Hh pathway regulation by ciliary PKA-RI $\alpha$ , it is important to  
341 consider the extra-ciliary functions of PKA-RI $\alpha$  when interpreting the drastic overproduction of GLI3<sup>R</sup>  
342 in unstimulated *Prkar1a*<sup>-/-</sup> mouse embryonic fibroblasts (Jacob et al., 2011). PKA-RI $\alpha$  is the only one  
343 of four PKA regulatory subunit essential for embryonic development and partial loss of PKA-RI $\alpha$  leads  
344 to a wide range of disease states including cystic kidneys (Veugelers et al., 2004; Amieux et al., 2002;  
345 Ye et al., 2017). Accordingly, Taylor and colleagues describe PKA-RI $\alpha$  as the ‘master regulator of  
346 PKA signaling’ and conclude that PKA-RI $\alpha$  contributes the bulk of PKA activity restriction in cells  
347 (Lu et al., 2019). Cytoplasmic PKA-C activity therefore becomes greatly elevated in the absence of  
348 PKA-RI $\alpha$ , and GLI2/3 phosphorylation by PKA can likely take place outside of cilia when PKA-RI $\alpha$   
349 is missing. Congruent with our interpretation, overexpression of a PKA-C variant incapable of binding  
350 to the regulatory subunits potently inhibits Hh signaling, presumably by phosphorylating GLI2/3 in  
351 the cytoplasm (Iglesias-Bartolome et al., 2015).

352

### 353 **PALD1 accumulates within cilia of selected cell types upon Hh stimulation**

354 Cilia-APEX2/TMT profiling detected a steady increase in SMO and PALD1 ciliary signals  
355 over the course of 60 min, and the 24 h time course indicates that SMO and PALD1 keep co-  
356 accumulating in cilia until 4 h (Figs. 4B, 4C and 5A). To validate this result, we assessed the ciliary  
357 accumulation of endogenous PALD1 by immunofluorescence microscopy (Fig. 6A). In agreement with  
358 the hierarchical clustering analysis (Fig. 5A), the increase in ciliary PALD1 signals upon Shh  
359 stimulation followed very similar kinetics to those of SMO (Fig. 6B). Given the striking Hh signal-  
360 dependent co-localization SMO and PALD1 in cilia, we sought to determine the functional interaction  
361 of PALD1 with the Hh pathway. Experimentally, activation of SMO by Smoothened agonist (SAG)  
362 fully engages the Hh pathway and bypasses PTCH1 (see Fig. 1A). Given that endogenous PALD1 and  
363 SMO accumulated efficiently in primary cilia in response to SAG (Figs. 6C-D), we conclude that ciliary  
364 accumulation of PALD1 lies downstream of SMO. Considering the nearly identical kinetics of PALD1  
365 and SMO ciliary accumulation, we hypothesized that PALD1 may piggyback on SMO entering cilia  
366 via a physical interaction. To test this hypothesis, we leveraged cyclopamine, a SMO antagonist that  
367 promotes ciliary accumulation of SMO while blocking Hh pathway accumulation (Wilson et al., 2009;  
368 Wang et al., 2009; Rohatgi et al., 2009). While cyclopamine promoted ciliary accumulation of SMO  
369 in IMCD3 cells, it did not increase the ciliary levels of PALD1 (Figs. 6E and 6F), indicating that ciliary  
370 accumulation of SMO is not sufficient to drive PALD1 into cilia and that SMO must be activated for



371 PALD1 to accumulate in cilia. To test whether PALD1 entry into cilia is sensitive to the reduction in  
372 [cAMP]<sub>cilia</sub> downstream of SMO, we resorted to the ciliary G<sub>i</sub>PCR somatostatin receptor 3 (SSTR3<sup>NG</sup>)  
373 (Nager et al., 2017). Addition of somatostatin to IMCD3 cells stably expressing mNeonGreen-tagged  
374 SSTR3 (SSTR3<sup>NG</sup>) triggers activation of the G<sub>i</sub>PCR inside cilia and hallmarks of ciliary G<sub>α</sub>i  
375 activation (Ye et al., 2018). Strikingly, SSTR3 activation is sufficient to recruit PALD1 to primary cilia  
376 (Figs. 6G-H), suggesting that, similarly to GPR161 exit from cilia, ciliary PALD1 accumulation  
377 responds to drops in ciliary cAMP levels.

378 We next sought to determine whether PALD1 is generally integrated with Hh signaling, or  
379 whether PALD1 performs a more specialized function related to Hh signaling. In addition to IMCD3,  
380 PALD1 protein expression was detectable in NIH-3T3 cells, C2C12 myoblasts, MIN6 pancreatic β  
381 cells and human embryonic kidney (HEK) cells (Fig. 7A). Unlike some Hh pathway components such  
382 as PTCH1 or GLI1 that are translational targets of the Hh pathway, PALD1 expression did not  
383 appreciably change in response to Hh pathway stimulation. Unexpectedly, PALD1 protein expression  
384 was not detectable in telomerase immortalized human retinal pigment epithelial (RPE1-hTERT) cells.  
385 Since PALD1 was detected in HEK cells, the antibody does recognize the human protein. Because  
386 RPE1-hTERT cells may not be capable of mounting a robust Hh response, we turned our attention  
387 to cell types where the Hh response has been extensively validated. NIH-3T3 cells constitute a well-  
388 accepted cell-based system for Hh signaling (Taipale et al., 2000). Surprisingly, activation of the Hh  
389 pathway in 3T3 cells led to the accumulation of SMO in cilia but failed to promote ciliary entry of  
390 PALD1 (Fig. 7B). Hedgehog signaling controls muscle differentiation (Hu et al., 2012) and the  
391 requirement for primary cilia in myoblast proliferation can be recapitulated in cultured C2C12 cells  
392 (Fu et al., 2014). While PALD1 was absent from unstimulated C2C12 cilia, PALD1 became enriched  
393 in primary cilia in response to Hh signal (Figs. 7C and 7D). These results indicate that, while not  
394 broadly generalizable, the association of PALD1 with Hedgehog signaling is not limited to IMCD3  
395 cells.

396 Sequence analysis revealed several key features of PALD1 (Fig. 7E). PALD1 contains a glycine  
397 residue at amino acid position 2 that is almost certainly myristoylated as PALD1[Gly2] scores highly  
398 in all predictors of N-myristoylation (Bologna et al., 2004; Maurer-Stroh et al., 2002; Xie et al., 2016)  
399 and expression of the N-terminus of PALD1 in a cell-free system produced a protein myristoylated at  
400 Gly2 (Suzuki et al., 2010). Importantly, PALD1 was recovered in affinity purification of the myristoyl  
401 chaperone Unc119 (Wright et al., 2011). Myristoylation is a major determinant in the ciliary targeting  
402 of a variety of proteins (e.g. NPHP3, Cystin) and UNC119 mediates the entry of these myristoylated  
403 proteins into cilia (Stephen and Ismail, 2016). It is thus conceivable that PALD1's regulated targeting  
404 to cilia involves the regulated unmasking of its attached myristate. PALD1 belongs to the large protein

405 tyrosine phosphatase (PTP) superfamily (Chen et al., 2017). While PALD1 contains two PTP active  
406 site motifs (CXXXXXR), PALD1 is missing the 280 amino acid extended catalytic domain and  
407 represents a divergent PTP family member. In agreement with these observations, *in vitro* assays have  
408 thus far failed to detect protein phosphatase activity for PALD1 (Huang et al., 2009). In the absence of  
409 demonstrated phosphatase activity or identified substrate, PALD1 has been proposed to be an anti-  
410 phosphatase or a pseudophosphatase (Roffers-Agarwal et al., 2012).

411 PALD1 is conserved among all clades of eukaryotic life, from protists to mammals (Fig. 7F).  
412 Interestingly, a clustering analysis of pathways based on shared inferred ancestry (Li et al., 2014)  
413 grouped PALD1 with the cilia-associated proteins CFAP54 (cilia- and flagella-associated protein 54  
414 (McKenzie et al., 2015, 54)), the tubulin detyrosinases vasohibin-1 and -2 (Nieuwenhuis et al., 2017;  
415 Aillaud et al., 2017), and the IFT-B subunit IFT25. Although PALD1 is not restricted to ciliated  
416 organisms, it displays some co-conservation with cilia (Fig. 7F) and the overlap in phylogenetic co-  
417 conservation is most striking with IFT25. Together with the IFT27 protein, IFT25 forms a stable  
418 subcomplex of IFT-B that functions as a regulator of BBSome function and thus participates in the  
419 regulated removal of membrane proteins from cilia (Bhogaraju et al., 2011; Liew et al., 2014; Eguether  
420 et al., 2014). Metazoa that have lost IFT25/27 either lack a Hh response (*C. elegans*) or transduce  
421 Hedgehog signals independently of cilia (*Drosophila*) (Fig. 7F). Meanwhile, organisms such as  
422 *Chlamydomonas* that have retained IFT25/27 but that do not transduce Hh signals require this IFT-B  
423 subcomplex for BBSome export from cilia (Dong et al., 2017). The shared phylogenetic pattern of  
424 association of IFT25/27 and PALD1 with Hh signaling and cilia suggests that PALD1 performs a  
425 function in cilia that supports efficient Hh signaling while not being absolutely required for either cilia  
426 assembly or Hh signaling. In agreement with the tissue-specific expression of PALD1 (Huang et al.,  
427 2009) and the integration of PALD1 with Hh signaling in a subset of cell lines, we propose that PALD1  
428 fulfills a cell-type specific function in multicellular organisms.

429 Besides the aforementioned cilia-related proteins, the CLIME analysis revealed two  
430 phosphatases co-conserved with PALD1: Phospho1, an ancient phosphoethanolamine and  
431 phosphocholine phosphatase with roles in bone mineralization in vertebrates and Phospho2, a  
432 pyridoxal-5-phosphate phosphatase related to Phospho1. Phospho1/2 belong to the haloacid  
433 dehalogenase phosphatase superfamily and bear no resemblance to the PTP family or PALD1. The  
434 co-retention of Phospho1, Phospho2 and PALD1 in a variety of organism is remarkable as the only  
435 common thread between these proteins is the release of inorganic phosphate. In this context, probing  
436 the genetic interactions between PALD1, Phospho1 and Phospho2 may reveal an unexpected  
437 functional relationship between these proteins.

438 PALD1-deficient myoblasts exhibit increased levels of insulin receptor –a protein previously  
439 detected in primary cilia (Gerdes et al., 2014)– and PALD1 overexpression reduces insulin receptor  
440 levels as well as its signal-dependent phosphorylation (Huang et al., 2009). As we observe PALD1  
441 accumulation in myoblast primary cilia in response to Shh but also after stimulation of the ciliary  
442 GPCR SSTR3, it is tempting to speculate that PALD1 may assist IFT25/27 in the ciliary exit of ciliary  
443 receptors and the desensitization of associated signaling pathways.

#### 444 445 **PALD1 is an attenuator of Hh signaling in IMCD3 cells**

446 To assess a potential role for PALD1 in Hh signaling, we generated PALD1-deficient IMCD3  
447 cells bearing biallelic frameshift mutations by CRISPR/Cas9-mediated genome editing (Fig. S4). The  
448 morphology of cilia, as assessed by acetylated tubulin or IFT88 staining, was indistinguishable between  
449 WT and *Pald1*<sup>-/-</sup> cells (Fig. 8A). Immunoblotting confirmed the absence of PALD1 from *Pald1*<sup>-/-</sup> cells,  
450 while the levels of ciliary proteins PTCH1 and IFT88 were unaffected (Fig. 8B). Consistent with a  
451 functional relationship between PALD1 and the Hh pathway, we detected a significant reduction in  
452 the levels of GLI3 repressor (GLI3<sup>R</sup>) as well as an increase in full-length GLI3 (GLI3<sup>FL</sup>) in unstimulated  
453 *Pald1*<sup>-/-</sup> cells compared to WT cells (Fig. 8B). Further underscoring the similarities in phylogenetic  
454 distribution between PALD1 and IFT25/27, the effect of PALD1 deletion on GLI3 processing is  
455 reminiscent of the Hh defect described in IFT27-deficient mouse skin (Yang et al., 2015). The ratio  
456 between the full-length and repressor forms of GLI3 (GLI3<sup>FL</sup>/GLI3<sup>R</sup>) has been used as a proxy for Hh  
457 pathway activation, as this ratio increases severalfold upon Hh pathway activation (Wang et al., 2000;  
458 Wen et al., 2010). In wild-type IMCD3 cells, the GLI3<sup>FL</sup>/GLI3<sup>R</sup> ratio increased 2-fold after Hh  
459 addition (Fig. 8C). Meanwhile, unstimulated *Pald1*<sup>-/-</sup> IMCD3 cells exhibit a similar GLI3<sup>FL</sup>/GLI3<sup>R</sup>  
460 ratio as Shh-treated wild-type cells, suggesting that PALD1 restricts Hh pathway activation in the  
461 absence of Hh ligand. The GLI3<sup>FL</sup>/GLI3<sup>R</sup> ratio further increased after Hh stimulation of *Pald1*<sup>-/-</sup> cells,  
462 indicating that PALD1-deficient cells still remained Hedgehog-responsive (Fig. 8C).

463 To investigate the source of spontaneous pathway activation in PALD1-deficient IMCD3 cells,  
464 we assessed the cilia localization of SMO and GPR161 in response to Hh pathway stimulation. As in  
465 WT cells, SMO was not detected in resting *Pald1*<sup>-/-</sup> cilia and accumulated normally in response to  
466 pathway activation (Figs. 8D and 8E). Meanwhile, GPR161 levels were reduced in cilia of unstimulated  
467 PALD1-deficient IMCD3 cells compared to unstimulated WT cells (Figs. 8D and 8F), consistent with  
468 a mild spontaneous activation of the Hh pathway. In agreement with the observed increase in the  
469 GLI3<sup>FL</sup>/GLI3<sup>R</sup> ratios, GPR161 levels in PALD1-deficient cilia decreased further after Hh pathway  
470 activation. In conclusion, PALD1-deficient IMCD3 cells do respond to Hh stimulation but  
471 spontaneously activate the pathway in IMCD3 cells. Hence, unlike for negative regulators, the Hh

472 pathway is not strictly dependent on PALD1 function, which appears to attenuate Hh signals in certain  
473 cell types to finetune cellular responses during tissue patterning, as proposed for GPR161 (Pusapati et  
474 al., 2018a).

475 Numerous genetic screens identified a large number of components required for Hh signaling,  
476 including proteins required for protein trafficking and maintenance of primary cilia (Jacob et al., 2011;  
477 Breslow et al., 2018; Pusapati et al., 2018b; Kim et al., 2010; Roosing et al., 2015; Wheway et al.,  
478 2015). Here, we have identified PALD1 in our proteomic screen as a protein that accumulates in  
479 primary cilia in response to Hh signal, similar to SMO. Two aspects might explain why PALD1 had  
480 not been previously associated with Hh signaling: i) PALD1 is dispensable for Hh signal transmission  
481 in several tissues, as PALD1-deficient IMCD3 cells mount a partial response to Hh (Fig. 8) and *Pald1*<sup>-/-</sup>  
482 mice only show a mild phenotype (German Mouse Clinic Consortium et al., 2017). ii) PALD1 is a  
483 cell-type specific factor that accumulates in primary cilia of select cell types in response to Hh signal.  
484 The absence of signal-dependent accumulation of PALD1 in NIH-3T3 cells suggests that PALD1 may  
485 not participate in the Hh response in these cells, thus providing a possible explanation for why the  
486 functional genomics screen for Hh signaling conducted in 3T3 cells did not identify PALD1 as a  
487 regulator of Hh signaling (Breslow et al., 2018; Pusapati et al., 2018b).

488 Starting with the discovery that Hedgehog signaling require cilia for signal transduction in  
489 vertebrates (Huangfu et al., 2003), the past 15 years revealed an elaborate choreography of signaling  
490 factors entering and exiting cilia: one protein (SMO) that accumulates in cilia upon Hh pathway  
491 activation, two proteins (PTCH1 and GPR161) that undergo Hh-dependent exit from cilia and four  
492 proteins (GLI2, GLI3, SUFU and KIF7) that accumulate at the tip of cilia in Hh-stimulated cells.  
493 Because these findings relied on imaging the core Hh signaling components defined by *Drosophila*  
494 genetics, and since *Drosophila* transduce Hedgehog signals independently of cilia, one was left to wonder  
495 how many proteins redistributing in response to Hh were left to discover. The cilia-APEX2/TMT  
496 proteomics workflow addresses this question by enabling a systematic quantitation of individual  
497 signaling molecules in cilia in a time-resolved manner. While the discovery of novel ‘tipping’ proteins  
498 awaits the development of CiliaTip-APEX2, our analysis of the cilia proteome remodeling during Hh  
499 signaling correctly identified the Hh-dependent redistribution of SMO, PTCH1 and GPR161 and  
500 revealed two additional factors that undergo Hh-induced ciliary redistribution. PKA-RI $\alpha$  is likely to  
501 be part of a universal ciliary cAMP gain modulator together with GPR161 that operates in all cells,  
502 with roles possibly extending beyond Hh signaling. Interestingly, PALD1 is only connected to Hh  
503 signaling in a subset of cells. This observation highlights a critical limitation of primary cilia proteomics  
504 in mammalian cells: all available data sets are either for mouse kidney IMCD3 cells or highly  
505 specialized sensory cell types (Ishikawa et al., 2012; Mick et al., 2015; Kohli et al., 2017; Mayer et al.,

506 2009; Liu et al., 2007; Kuhlmann et al., 2014). Given that cilia-APEX2 only relies on targeting an  
507 enzyme to cilia, it should be applicable to specific tissues and cell types, ideally from a live organism or  
508 organoids and may reveal a currently unappreciated diversity in primary cilia composition.

509

510

511

512

513

## 514 **ACKNOWLEDGEMENTS**

515 We thank J. Goldstein and A. von der Malsburg for assistance in generating knockout IMCD3 cell  
516 lines, E. Krause for fluorescence-activated cell sorting, K.V. Anderson, J.K. Chen, E. Ampofo, J.M.  
517 Gerdes, C.G. Morrison, S. Mukhopadhyay, P.A. Beachy and M.P. Scott for reagents, P. Schuster for  
518 experimental assistance, D.K. Breslow, S. Schuch and S.S. Taylor for helpful discussions, and M. von  
519 Zastrow and M. Delling for comments on the manuscript. This work was supported by Deutsche  
520 Forschungsgemeinschaft (DFG) funding to D.U.M. (SFB894/TPA-22) and NIH grants to S.P.G.  
521 (GM67945) and M.V.N. (R01GM089933 and R21HD087126). This work was made possible, in part,  
522 by NEI EY002162 - Core Grant for Vision Research and by the Research to Prevent Blindness  
523 Unrestricted Grant (M.V.N.).

524

525

## 526 **AUTHOR CONTRIBUTIONS**

527 E.A.M. performed and analyzed most experiments. D.U.M. and M.V.N. conceptualized and wrote  
528 the manuscript with support by all authors. I.G.A. conducted and analyzed the PKA-related  
529 experiments. M.K. and D.U.M. established and performed the proximity labeling, TMT labeling and  
530 mass spectrometry experiments and analyzed respective data together with S.P.G.

531

532

## 533 **AUTHOR INFORMATION**

534 The authors declare no competing financial interests.

535

536

537

538

539



540 **REFERENCES**

541

- 542 Aillaud, C., C. Bosc, L. Peris, A. Bosson, P. Heemeryck, J. Van Dijk, J. Le Friec, B. Boulan, F.  
543 Vossier, L.E. Sanman, S. Syed, N. Amara, Y. Couté, L. Lafanechère, E. Denarier, C.  
544 Delphin, L. Pelletier, S. Humbert, M. Bogoyo, A. Andrieux, K. Rogowski, and M.-J. Moutin.  
545 2017. Vasohibins/SVBP are tubulin carboxypeptidases (TCPs) that regulate neuron  
546 differentiation. *Science*. 358:1448–1453. doi:10.1126/science.aao4165.
- 547 Amieux, P.S., D.G. Howe, H. Knickerbocker, D.C. Lee, T. Su, G.S. Laszlo, R.L. Idzerda, and G.S.  
548 McKnight. 2002. Increased Basal cAMP-dependent Protein Kinase Activity Inhibits the  
549 Formation of Mesoderm-derived Structures in the Developing Mouse Embryo. *J. Biol. Chem.*  
550 277:27294–27304. doi:10.1074/jbc.M200302200.
- 551 Anvarian, Z., K. Mykytyn, S. Mukhopadhyay, L.B. Pedersen, and S.T. Christensen. 2019. Cellular  
552 signalling by primary cilia in development, organ function and disease. *Nat Rev Nephrol.*  
553 doi:10.1038/s41581-019-0116-9.
- 554 Arveseth, C.D., J.T. Happ, D.S. Hedeem, J.-F. Zhu, J.L. Capener, D.K. Shaw, I. Deshpande, J.  
555 Liang, J. Xu, S.L. Stubben, I.B. Nelson, M.F. Walker, N.J. Krogan, D.J. Grunwald, R.  
556 Hüttenhain, A. Manglik, and B.R. Myers. 2020. Smoothed Transduces Hedgehog Signals  
557 via Activity-Dependent Sequestration of PKA Catalytic Subunits. *bioRxiv.*  
558 2020.07.01.183079. doi:10.1101/2020.07.01.183079.
- 559 Bachmann, V.A., J.E. Mayrhofer, R. Ilouz, P. Tschakner, P. Raffener, R. Röck, M. Courcelles, F.  
560 Apelt, T.-W. Lu, G.S. Baillie, P. Thibault, P. Aanstad, U. Stelzl, S.S. Taylor, and E. Stefan.  
561 2016. Gpr161 anchoring of PKA consolidates GPCR and cAMP signaling. *Proc Natl Acad Sci*  
562 *U S A*. 113:7786–7791. doi:10.1073/pnas.1608061113.
- 563 Bhogaraju, S., M. Taschner, M. Morawetz, C. Basquin, and E. Lorentzen. 2011. Crystal structure of  
564 the intraflagellar transport complex 25/27. *The EMBO Journal*. 30:1907–1918.  
565 doi:10.1038/emboj.2011.110.
- 566 Blau, H.M., G.K. Pavlath, E.C. Hardeman, C.P. Chiu, L. Silberstein, S.G. Webster, S.C. Miller,  
567 and C. Webster. 1985. Plasticity of the differentiated state. *Science*. 230:758–766.  
568 doi:10.1126/science.2414846.
- 569 Bodnar, A.G., M. Ouellette, M. Frolkis, S.E. Holt, C.P. Chiu, G.B. Morin, C.B. Harley, J.W. Shay,  
570 S. Lichtsteiner, and W.E. Wright. 1998. Extension of life-span by introduction of telomerase  
571 into normal human cells. *Science*. 279:349–352. doi:10.1126/science.279.5349.349.
- 572 Bologna, G., C. Yvon, S. Duvaud, and A.-L. Veuthey. 2004. N-Terminal myristoylation predictions  
573 by ensembles of neural networks. *Proteomics*. 4:1626–1632. doi:10.1002/pmic.200300783.
- 574 Breslow, D., and M.V. Nachury. 2015. Analysis of soluble protein entry into primary cilia using  
575 semipermeabilized cells. *Methods in cell biology*. 127:203–221.  
576 doi:10.1016/bs.mcb.2014.12.006.
- 577 Breslow, D.K., S. Hoogendoorn, A.R. Kopp, D.W. Morgens, B.K. Vu, M.C. Kennedy, K. Han, A.  
578 Li, G.T. Hess, M.C. Bassik, J.K. Chen, and M.V. Nachury. 2018. A CRISPR-based screen  
579 for Hedgehog signaling provides insights into ciliary function and ciliopathies. *Nat. Genet.*  
580 50:460–471. doi:10.1038/s41588-018-0054-7.

- 581 Carvalho-Santos, Z., P. Machado, P. Branco, F. Tavares-Cadete, A. Rodrigues-Martins, J.B.  
582 Pereira-Leal, and M. Bettencourt-Dias. 2010. Stepwise evolution of the centriole-assembly  
583 pathway. *J. Cell. Sci.* 123:1414–1426. doi:10.1242/jcs.064931.
- 584 Chen, M.J., J.E. Dixon, and G. Manning. 2017. Genomics and evolution of protein phosphatases.  
585 *Sci. Signal.* 10:eaag1796. doi:10.1126/scisignal.aag1796.
- 586 Daly, O.M., D. Gaboriau, K. Karakaya, S. King, T.J. Dantas, P. Lalor, P. Dockery, A. Krämer, and  
587 C.G. Morrison. 2016. Gene-targeted CEP164-deficient cells show a ciliation defect with  
588 intact DNA repair capacity. *Journal of Cell Science.* doi:10.1242/jcs.186221.
- 589 Dong, B., S. Wu, J. Wang, Y.-X. Liu, Z. Peng, D.-M. Meng, K. Huang, M. Wu, and Z.-C. Fan.  
590 2017. Chlamydomonas IFT25 is dispensable for flagellar assembly but required to export the  
591 BBSome from flagella. *Biology open.* bio.026278. doi:10.1242/bio.026278.
- 592 Eguether, T., J.T. San Agustin, B.T. Keady, J.A. Jonassen, Y. Liang, R. Francis, K. Tobita, C.A.  
593 Johnson, Z.A. Abdelhamed, C.W. Lo, and G.J. Pazour. 2014. IFT27 links the BBSome to  
594 IFT for maintenance of the ciliary signaling compartment. *Developmental Cell.* 31:279–290.  
595 doi:10.1016/j.devcel.2014.09.011.
- 596 Endoh-Yamagami, S., M. Evangelista, D. Wilson, X. Wen, J.-W. Theunissen, K. Phamluong, M.  
597 Davis, S.J. Scales, M.J. Solloway, F.J. de Sauvage, and A.S. Peterson. 2009. The mammalian  
598 Cos2 homolog Kif7 plays an essential role in modulating Hh signal transduction during  
599 development. *Current biology: CB.* 19:1320–1326. doi:10.1016/j.cub.2009.06.046.
- 600 Evangelista, M., T.Y. Lim, J. Lee, L. Parker, A. Ashique, A.S. Peterson, W. Ye, D.P. Davis, and F.J.  
601 de Sauvage. 2008. Kinome siRNA screen identifies regulators of ciliogenesis and hedgehog  
602 signal transduction. *Science Signaling.* 1:ra7. doi:10.1126/scisignal.1162925.
- 603 Fu, W., P. Asp, B. Canter, and B.D. Dynlacht. 2014. Primary cilia control hedgehog signaling during  
604 muscle differentiation and are deregulated in rhabdomyosarcoma. *Proc Natl Acad Sci U S A.*  
605 111:9151–9156. doi:10.1073/pnas.1323265111.
- 606 Garcia-Gonzalo, F.R., and J.F. Reiter. 2017. Open Sesame: how transition fibers and the transition  
607 zone control ciliary composition. *Cold Spring Harb Perspect Biol.* 9:a028134.  
608 doi:10.1101/cshperspect.a028134.
- 609 Gerdes, J.M., S. Christou-Savina, Y. Xiong, T. Moede, N. Moruzzi, P. Karlsson-Edlund, B.  
610 Leibiger, I.B. Leibiger, C.-G. Östenson, P.L. Beales, and P.-O. Berggren. 2014. Ciliary  
611 dysfunction impairs beta-cell insulin secretion and promotes development of type 2 diabetes  
612 in rodents. *Nature Communications.* 5:5308. doi:10.1038/ncomms6308.
- 613 German Mouse Clinic Consortium, I. Egaña, H. Kaito, A. Nitzsche, L. Becker, C. Ballester-Lopez,  
614 C. Niaudet, M. Petkova, W. Liu, M. Vanlandewijck, A. Vernaleken, T. Klopstock, H. Fuchs,  
615 V. Gailus-Durner, M. Hrabe de Angelis, H. Rask-Andersen, H.J. Johansson, J. Lehtiö, L. He,  
616 A.Ö. Yildirim, and M. Hellström. 2017. Female mice lacking Pald1 exhibit endothelial cell  
617 apoptosis and emphysema. *Scientific reports.* 7:432. doi:10.1038/s41598-017-14894-9.
- 618 Gigante, E.D., and T. Caspary. 2020. Signaling in the primary cilium through the lens of the  
619 Hedgehog pathway. *Wiley Interdiscip Rev Dev Biol.* e377. doi:10.1002/wdev.377.

- 620 Gonçalves, J., and L. Pelletier. 2017. The Ciliary Transition Zone: Finding the Pieces and  
621 Assembling the Gate. *Molecules and cells*. 40:243–253. doi:10.14348/molcells.2017.0054.
- 622 Green, J.A., C.L. Schmid, E. Bley, P.C. Monsma, A. Brown, L.M. Bohn, and K. Mykytyn. 2015.  
623 Recruitment of  $\beta$ -Arrestin into Neuronal Cilia Modulates Somatostatin Receptor Subtype 3  
624 Ciliary Localization. *Molecular and Cellular Biology*. 36:223–235. doi:10.1128/MCB.00765-15.
- 625 Hildebrandt, F., T. Benzing, and N. Katsanis. 2011. Ciliopathies. *The New England journal of medicine*.  
626 364:1533–1543. doi:10.1056/NEJMra1010172.
- 627 Hu, J.K.-H., E. McGlenn, B.D. Harfe, G. Kardon, and C.J. Tabin. 2012. Autonomous and  
628 nonautonomous roles of Hedgehog signaling in regulating limb muscle formation. *Genes Dev*.  
629 26:2088–2102. doi:10.1101/gad.187385.112.
- 630 Huang, S.-M.A., M.K. Hancock, J.L. Pitman, A.P. Orth, and N. Gekakis. 2009. Negative Regulators  
631 of Insulin Signaling Revealed in a Genome-Wide Functional Screen. *PLoS ONE*. 4:e6871.  
632 doi:10.1371/journal.pone.0006871.
- 633 Huangfu, D., A. Liu, A.S. Rakean, N.S. Murcia, L. Niswander, and K.V. Anderson. 2003.  
634 Hedgehog signalling in the mouse requires intraflagellar transport proteins. *Nature*. 426:83–  
635 87. doi:10.1038/nature02061.
- 636 Iglesias-Bartolome, R., D. Torres, R. Marone, X. Feng, D. Martin, M. Simaan, M. Chen, L.S.  
637 Weinstein, S.S. Taylor, A.A. Molinolo, and J.S. Gutkind. 2015. Inactivation of a G $\alpha$ (s)-PKA  
638 tumour suppressor pathway in skin stem cells initiates basal-cell carcinogenesis. *Nature Cell*  
639 *Biology*. 17:793–803. doi:10.1038/ncb3164.
- 640 Ishikawa, H., J. Thompson, J.R. Yates, and W.F. Marshall. 2012. Proteomic analysis of mammalian  
641 primary cilia. *Current biology: CB*. 22:414–419. doi:10.1016/j.cub.2012.01.031.
- 642 Jacob, L.S., X. Wu, M.E. Dodge, C.-W. Fan, O. Kulak, B. Chen, W. Tang, B. Wang, J.F.  
643 Amatruda, and L. Lum. 2011. Genome-Wide RNAi Screen Reveals Disease-Associated  
644 Genes That Are Common to Hedgehog and Wnt Signaling. *Science Signaling*. 4:ra4.  
645 doi:10.1126/scisignal.2001225.
- 646 Kim, J., J.E. Lee, S. Heynen-Genel, E. Suyama, K. Ono, K. Lee, T. Ideker, P. Aza-Blanc, and J.G.  
647 Gleeson. 2010. Functional genomic screen for modulators of ciliogenesis and cilium length.  
648 *Nature*. 464:1048–1051. doi:10.1038/nature08895.
- 649 Kohli, P., M. Höhne, C. Jüngst, S. Bertsch, L.K. Ebert, A.C. Schauss, T. Benzing, M.M. Rinschen,  
650 and B. Schermer. 2017. The ciliary membrane-associated proteome reveals actin-binding  
651 proteins as key components of cilia. *EMBO Rep*. 18:1521–1535.  
652 doi:10.15252/embr.201643846.
- 653 Kong, J.H., C. Siebold, and R. Rohatgi. 2019. Biochemical mechanisms of vertebrate hedgehog  
654 signaling. *Development*. 146. doi:10.1242/dev.166892.
- 655 Kuhlmann, K., A. Tschapek, H. Wiese, M. Eisenacher, H.E. Meyer, H.H. Hatt, S. Oeljeklaus, and  
656 B. Warscheid. 2014. The Membrane Proteome of Sensory Cilia to the Depth of Olfactory  
657 Receptors. *Molecular & Cellular Proteomics*. doi:10.1074/mcp.M113.035378.



- 658 Lam, S.S., J.D. Martell, K.J. Kamer, T.J. Deerinck, M.H. Ellisman, V.K. Mootha, and A.Y. Ting.  
659 2015. Directed evolution of APEX2 for electron microscopy and proximity labeling. *Nature*  
660 *Methods*. 12:51–54. doi:10.1038/nmeth.3179.
- 661 Li, J., J.G. Van Vranken, L. Pontano Vaites, D.K. Schweppe, E.L. Huttlin, C. Etienne, P.  
662 Nandhikonda, R. Viner, A.M. Robitaille, A.H. Thompson, K. Kuhn, I. Pike, R.D.  
663 Bomgarden, J.C. Rogers, S.P. Gygi, and J.A. Paulo. 2020. TMTpro reagents: a set of isobaric  
664 labeling mass tags enables simultaneous proteome-wide measurements across 16 samples. *Nat.*  
665 *Methods*. 17:399–404. doi:10.1038/s41592-020-0781-4.
- 666 Li, Y., S.E. Calvo, R. Gutman, J.S. Liu, and V.K. Mootha. 2014. Expansion of biological pathways  
667 based on evolutionary inference. *Cell*. 158:213–225. doi:10.1016/j.cell.2014.05.034.
- 668 Liem, K.F., M. He, P.J.R. Ocbina, and K.V. Anderson. 2009. Mouse Kif7/Costal2 is a cilia-  
669 associated protein that regulates Sonic hedgehog signaling. *Proc Natl Acad Sci U S A*.  
670 106:13377–13382. doi:10.1073/pnas.0906944106.
- 671 Liew, G.M., F. Ye, A.R. Nager, J.P. Murphy, J.S. Lee, M. Aguiar, D. Breslow, S.P. Gygi, and M.V.  
672 Nachury. 2014. The intraflagellar transport protein IFT27 promotes BBSome exit from cilia  
673 through the GTPase ARL6/BBS3. *Developmental Cell*. 31:265–278.  
674 doi:10.1016/j.devcel.2014.09.004.
- 675 Liu, G., A. Papa, A.N. Katchman, S.I. Zakharov, D. Roybal, J.A. Hennessey, J. Kushner, L. Yang,  
676 B.-X. Chen, A. Kushnir, K. Dangas, S.P. Gygi, G.S. Pitt, H.M. Colecraft, M. Ben-Johny, M.  
677 Kalocsay, and S.O. Marx. 2020. Mechanism of adrenergic CaV1.2 stimulation revealed by  
678 proximity proteomics. *Nature*. 577:695–700. doi:10.1038/s41586-020-1947-z.
- 679 Liu, Q., G. Tan, N. Levenkova, T. Li, E.N. Pugh, J.J. Rux, D.W. Speicher, and E.A. Pierce. 2007.  
680 The proteome of the mouse photoreceptor sensory cilium complex. *Mol. Cell Proteomics*.  
681 6:1299–1317. doi:10.1074/mcp.M700054-MCP200.
- 682 Lu, T.-W., J. Wu, P.C. Aoto, J.-H. Weng, L.G. Ahuja, N. Sun, C.Y. Cheng, P. Zhang, and S.S.  
683 Taylor. 2019. Two PKA RI $\alpha$  holoenzyme states define ATP as an isoform-specific orthosteric  
684 inhibitor that competes with the allosteric activator, cAMP. *Proc. Natl. Acad. Sci. U.S.A.*  
685 116:16347–16356. doi:10.1073/pnas.1906036116.
- 686 Maurer-Stroh, S., B. Eisenhaber, and F. Eisenhaber. 2002. N-terminal N-myristoylation of proteins:  
687 prediction of substrate proteins from amino acid sequence. *J. Mol. Biol.* 317:541–557.  
688 doi:10.1006/jmbi.2002.5426.
- 689 Mayer, U., A. Küller, P.C. Daiber, I. Neudorf, U. Warnken, M. Schnölzer, S. Frings, and F.  
690 Möhrlen. 2009. The proteome of rat olfactory sensory cilia. *Proteomics*. 9:322–334.  
691 doi:10.1002/pmic.200800149.
- 692 McAllister, F.E., and S.P. Gygi. 2013. Correlation profiling for determining kinase-substrate  
693 relationships. *Methods*. 61:227–235. doi:10.1016/j.ymeth.2013.03.012.
- 694 McKenzie, C.W., B. Craige, T.V. Kroeger, R. Finn, T.A. Wyatt, J.H. Sisson, J.A. Pavlik, L.  
695 Strittmatter, G.M. Hendricks, G.B. Witman, and L. Lee. 2015. CFAP54 is required for  
696 proper ciliary motility and assembly of the central pair apparatus in mice. *Mol. Biol. Cell*.  
697 26:3140–3149. doi:10.1091/mbc.E15-02-0121.

- 698 Mick, D.U., R.B. Rodrigues, R.D. Leib, C.M. Adams, A.S. Chien, S.P. Gygi, and M.V. Nachury.  
699 2015. Proteomics of Primary Cilia by Proximity Labeling. *Developmental Cell*. 35:497–512.  
700 doi:10.1016/j.devcel.2015.10.015.
- 701 Milenkovic, L., L. Milenkovic, M.P. Scott, M.P. Scott, and R. Rohatgi. 2009. Lateral transport of  
702 Smoothed from the plasma membrane to the membrane of the cilium. *The Journal of Cell*  
703 *Biology*. 187:365–374. doi:10.1083/jcb.200907126.
- 704 Moore, B.S., A.N. Stepanchick, P.H. Tewson, C.M. Hartle, J. Zhang, A.M. Quinn, T.E. Hughes,  
705 and T. Mirshahi. 2016. Cilia have high cAMP levels that are inhibited by Sonic Hedgehog-  
706 regulated calcium dynamics. *Proc Natl Acad Sci U S A*. 113:13069–13074.  
707 doi:10.1073/pnas.1602393113.
- 708 Morita, E., J. Arai, D. Christensen, J. Votteler, and W.I. Sundquist. 2012. Attenuated protein  
709 expression vectors for use in siRNA rescue experiments. *BioTechniques*. 0:1–5.  
710 doi:10.2144/000113909.
- 711 Mukhopadhyay, S., X. Wen, N. Ratti, A. Loktev, L. Rangell, S.J. Scales, and P.K. Jackson. 2013.  
712 The ciliary G-protein-coupled receptor Gpr161 negatively regulates the Sonic hedgehog  
713 pathway via cAMP signaling. *Cell*. 152:210–223. doi:10.1016/j.cell.2012.12.026.
- 714 Musheshe, N., M. Schmidt, and M. Zaccolo. 2018. cAMP: From Long-Range Second Messenger to  
715 Nanodomain Signalling. *Trends in Pharmacological Sciences*. 39:209–222.  
716 doi:10.1016/j.tips.2017.11.006.
- 717 Nachury, M.V., and D.U. Mick. 2019. Establishing and regulating the composition of cilia for signal  
718 transduction. *Nat. Rev. Mol. Cell Biol.* 20:389–405. doi:10.1038/s41580-019-0116-4.
- 719 Nager, A.R., J.S. Goldstein, V. Herranz-Pérez, D. Portran, F. Ye, J.M. García-Verdugo, and M.V.  
720 Nachury. 2017. An Actin Network Dispatches Ciliary GPCRs into Extracellular Vesicles to  
721 Modulate Signaling. *Cell*. 168:252–263.e14. doi:10.1016/j.cell.2016.11.036.
- 722 Nakata, K., D. Shiba, D. Kobayashi, and T. Yokoyama. 2012. Targeting of Nphp3 to the primary  
723 cilia is controlled by an N-terminal myristoylation site and coiled-coil domains. *Cytoskeleton*  
724 (*Hoboken, Nj*). 69:221–234. doi:10.1002/cm.21014.
- 725 Nieuwenhuis, J., A. Adamopoulos, O.B. Bleijerveld, A. Mazouzi, E. Stickel, P. Celie, M. Altelaar, P.  
726 Knipscheer, A. Perrakis, V.A. Blomen, and T.R. Brummelkamp. 2017. Vasohibins encode  
727 tubulin detyrosinating activity. *Science*. 358:1453–1456. doi:10.1126/science.aao5676.
- 728 Paek, J., M. Kalocsay, D.P. Staus, L. Wingler, R. Pascolutti, J.A. Paulo, S.P. Gygi, and A.C. Kruse.  
729 2017. Multidimensional Tracking of GPCR Signaling via Peroxidase-Catalyzed Proximity  
730 Labeling. *Cell*. 169:338-349.e11. doi:10.1016/j.cell.2017.03.028.
- 731 Pal, K., S. Hwang, B. Somatilaka, H. Badgandi, P.K. Jackson, K. DeFea, and S. Mukhopadhyay.  
732 2016. Smoothed determines  $\beta$ -arrestin-mediated removal of the G protein-coupled  
733 receptor Gpr161 from the primary cilium. *The Journal of Cell Biology*. 212:861–875.  
734 doi:10.1083/jcb.201506132.
- 735 Paulo, J.A., J.D. O’Connell, R.A. Everley, J. O’Brien, M.A. Gygi, and S.P. Gygi. 2016. Quantitative  
736 mass spectrometry-based multiplexing compares the abundance of 5000 *S. cerevisiae* proteins  
737 across 10 carbon sources. *J Proteomics*. 148:85–93. doi:10.1016/j.jprot.2016.07.005.

- 738 Poitout, V., L.E. Stout, M.B. Armstrong, T.F. Walseth, R.L. Sorenson, and R.P. Robertson. 1995.  
739 Morphological and functional characterization of beta TC-6 cells--an insulin-secreting cell  
740 line derived from transgenic mice. *Diabetes*. 44:306–313. doi:10.2337/diab.44.3.306.
- 741 Pusapati, G.V., J.H. Kong, B.B. Patel, M. Gouti, A. Sagner, R. Sircar, G. Luchetti, P.W. Ingham, J.  
742 Briscoe, and R. Rohatgi. 2018a. G protein-coupled receptors control the sensitivity of cells to  
743 the morphogen Sonic Hedgehog. *Sci Signal*. 11. doi:10.1126/scisignal.aao5749.
- 744 Pusapati, G.V., J.H. Kong, B.B. Patel, A. Krishnan, A. Sagner, M. Kinnebrew, J. Briscoe, L.  
745 Aravind, and R. Rohatgi. 2018b. CRISPR Screens Uncover Genes that Regulate Target Cell  
746 Sensitivity to the Morphogen Sonic Hedgehog. *Dev. Cell*. 44:113-129.e8.  
747 doi:10.1016/j.devcel.2017.12.003.
- 748 Ran, F.A., P.D. Hsu, J. Wright, V. Agarwala, D.A. Scott, and F. Zhang. 2013. Genome engineering  
749 using the CRISPR-Cas9 system. *Nature Protocols*. 8:2281–2308. doi:10.1038/nprot.2013.143.
- 750 Reiter, J.F., and M.R. Leroux. 2017. Genes and molecular pathways underpinning ciliopathies. *Nat.*  
751 *Rev. Mol. Cell Biol*. 18:533–547. doi:10.1038/nrm.2017.60.
- 752 Riobo, N.A. 2014. Canonical and Non-Canonical Hedgehog Signaling Pathways: Role of G  
753 Proteins. *In The Smoothed Receptor in Cancer and Regenerative Medicine*. Springer  
754 International Publishing, Cham. 13–42.
- 755 Roffers-Agarwal, J., K.J. Hutt, and L.S. Gammill. 2012. Paladin is an antiphosphatase that regulates  
756 neural crest cell formation and migration. *Developmental Biology*. 371:180–190.  
757 doi:10.1016/j.ydbio.2012.08.007.
- 758 Rohatgi, R., L. Milenkovic, R.B. Corcoran, and M.P. Scott. 2009. Hedgehog signal transduction by  
759 Smoothed: pharmacologic evidence for a 2-step activation process. *Proc Natl Acad Sci U S A*.  
760 106:3196–3201. doi:10.1073/pnas.0813373106.
- 761 Rohatgi, R., L. Milenkovic, and M.P. Scott. 2007. Patched1 regulates hedgehog signaling at the  
762 primary cilium. *Science (New York, NY)*. 317:372–376. doi:10.1126/science.1139740.
- 763 Roosing, S., M. Hofree, S. Kim, E. Scott, B. Copeland, M. Romani, J.L. Silhavy, R.O. Rosti, J.  
764 Schroth, T. Mazza, E. Miccinilli, M.S. Zaki, K.J. Swoboda, J. Milisa-Drautz, W.B. Dobyns,  
765 M.A. Mikati, F. Incecik, M. Azam, R. Borgatti, R. Romaniello, R.-M. Boustany, C.L.  
766 Clericuzio, S. D'Arrigo, P. Stromme, E. Boltshauser, F. Stanzial, M. Mirabelli-Badenier, I.  
767 Moroni, E. Bertini, F. Emma, M. Steinlin, F. Hildebrandt, C.A. Johnson, M. Freilinger, K.K.  
768 Vaux, S.B. Gabriel, P. Aza-Blanc, S. Heynen-Genel, T. Ideker, B.D. Dynlacht, J.E. Lee,  
769 E.M. Valente, J. Kim, and J.G. Gleeson. 2015. Functional genome-wide siRNA screen  
770 identifies KIAA0586 as mutated in Joubert syndrome. *eLife*. 4:e06602.  
771 doi:10.7554/eLife.06602.
- 772 Shaner, N.C., G.G. Lambert, A. Chamma, Y. Ni, P.J. Cranfill, M.A. Baird, B.R. Sell, J.R. Allen,  
773 R.N. Day, M. Israelsson, M.W. Davidson, and J. Wang. 2013. A bright monomeric green  
774 fluorescent protein derived from Branchiostoma lanceolatum. *Nature Methods*. 10:407–409.  
775 doi:10.1038/nmeth.2413.
- 776 Shinde, S.R., A.R. Nager, and M.V. Nachury. 2020. Lysine63-linked ubiquitin chains earmark  
777 GPCRs for BBSome-mediated removal from cilia. *bioRxiv*. 2020.03.04.977090.  
778 doi:10.1101/2020.03.04.977090.

- 779 Smith, F.D., J.L. Esseltine, P.J. Nygren, D. Veessler, D.P. Byrne, M. Vonderach, I. Strashnov, C.E.  
780 Evers, P.A. Evers, L.K. Langeberg, and J.D. Scott. 2017. Local protein kinase A action  
781 proceeds through intact holoenzymes. *Science*. 356:1288–1293. doi:10.1126/science.aaj1669.
- 782 Stephen, L.A., and S. Ismail. 2016. Shuttling and sorting lipid-modified cargo into the cilia.  
783 *Biochemical Society Transactions*. 44:1273–1280. doi:10.1042/BST20160122.
- 784 Suzuki, T., K. Moriya, K. Nagatoshi, Y. Ota, T. Ezure, E. Ando, S. Tsunasawa, and T. Utsumi.  
785 2010. Strategy for comprehensive identification of human N-myristoylated proteins using an  
786 insect cell-free protein synthesis system. *Proteomics*. 10:1780–1793.  
787 doi:10.1002/pmic.200900783.
- 788 Taipale, J., J.K. Chen, M.K. Cooper, B. Wang, R.K. Mann, L. Milenkovic, M.P. Scott, and P.A.  
789 Beachy. 2000. Effects of oncogenic mutations in Smoothed and Patched can be reversed by  
790 cyclopamine. *Nature*. 406:1005–1009. doi:10.1038/35023008.
- 791 Tanos, B.E., B.E. Tanos, H.-J. Yang, H.-J. Yang, R. Soni, R. Soni, W.-J. Wang, W.-J. Wang, F.P.  
792 Macaluso, F.P. Macaluso, J.M. Asara, J.M. Asara, M.-F.B. Tsou, and M.-F.B. Tsou. 2013.  
793 Centriole distal appendages promote membrane docking, leading to cilia initiation. *Genes &  
794 development*. 27:163–168. doi:10.1101/gad.207043.112.
- 795 Taylor, S.S., R. Ilouz, P. Zhang, and A.P. Kornev. 2012. Assembly of allosteric macromolecular  
796 switches: lessons from PKA. *Nature Reviews Molecular Cell Biology*. 13:646–658.  
797 doi:10.1038/nrm3432.
- 798 Torres-Quesada, O., J.E. Mayrhofer, and E. Stefan. 2017. The many faces of compartmentalized  
799 PKA signalosomes. *Cell. Signal*. 37:1–11. doi:10.1016/j.cellsig.2017.05.012.
- 800 Tukachinsky, H., L.V. Lopez, and A. Salic. 2010. A mechanism for vertebrate Hedgehog signaling:  
801 recruitment to cilia and dissociation of SuFu-Gli protein complexes. *The Journal of Cell Biology*.  
802 191:415–428. doi:10.1083/jcb.201004108.
- 803 Veugelers, M., D. Wilkes, K. Burton, D.A. McDermott, Y. Song, M.M. Goldstein, K.L. Perle, C.J.  
804 Vaughan, A. O'Hagan, K.R. Bennett, B.J. Meyer, E. Legius, M. Karttunen, R. Norio, H.  
805 Kaariainen, M. Lavyne, J.-P. Neau, G. Richter, K. Kirali, A. Farnsworth, K. Stapleton, P.  
806 Morelli, Y. Takanashi, J.-S. Bamforth, F. Eitelberger, I. Noszian, W. Manfroi, J. Powers, Y.  
807 Mochizuki, T. Imai, G.T.C. Ko, D.A. Driscoll, E. Goldmuntz, J.M. Edelberg, A. Collins, D.  
808 Eccles, A.D. Irvine, G.S. McKnight, and C.T. Basson. 2004. Comparative PRKAR1A  
809 genotype–phenotype analyses in humans with Carney complex and prkar1a haploinsufficient  
810 mice. *PNAS*. 101:14222–14227. doi:10.1073/pnas.0405535101.
- 811 Wang, B., J.F. Fallon, and P.A. Beachy. 2000. Hedgehog-regulated processing of Gli3 produces an  
812 anterior/posterior repressor gradient in the developing vertebrate limb. *Cell*. 100:423–434.
- 813 Wang, Y., Z. Zhou, C.T. Walsh, and A.P. McMahon. 2009. Selective translocation of intracellular  
814 Smoothed to the primary cilium in response to Hedgehog pathway modulation. *Proceedings  
815 of the National Academy of Sciences of the United States of America*. 106:2623–2628.  
816 doi:10.1073/pnas.0812110106.
- 817 Wen, X., C.K. Lai, M. Evangelista, J.-A. Hongo, F.J. de Sauvage, and S.J. Scales. 2010. Kinetics of  
818 hedgehog-dependent full-length Gli3 accumulation in primary cilia and subsequent  
819 degradation. *Molecular and Cellular Biology*. 30:1910–1922. doi:10.1128/MCB.01089-09.

- 820 Whewey, G., M. Schmidts, D.A. Mans, K. Szymanska, T.-M.T. Nguyen, H. Racher, I.G. Phelps, G.  
821 Toedt, J. Kennedy, K.A. Wunderlich, N. Sorousch, Z.A. Abdelhamed, S. Natarajan, W.  
822 Herridge, J. van Reeuwijk, N. Horn, K. Boldt, D.A. Parry, S.J.F. Letteboer, S. Roosing, M.  
823 Adams, S.M. Bell, J. Bond, J. Higgins, E.E. Morrison, D.C. Tomlinson, G.G. Slaats, T.J.P.  
824 van Dam, L. Huang, K. Kessler, A. Gie's sl, C.V. Logan, E.A. Boyle, J. Shendure, S. Anazi,  
825 M. Aldahmesh, S. Al-Hazaa, R.A. Hegele, C. Ober, P. Frosk, A.A. Mhanni, B.N.  
826 Chodirker, A.E. Chudley, R. Lamont, F.P. Bernier, C.L. Beaulieu, P. Gordon, R.T. Pon, C.  
827 Donahue, A.J. Barkovich, L. Wolf, C. Toomes, C.T. Thiel, K.M. Boycott, M. McKibbin,  
828 C.F. Inglehearn, UK10K Consortium, University of Washington Center for Mendelian  
829 Genomics, F. Stewart, H. Omran, M.A. Huynen, P.I. Sergouniotis, F.S. Alkuraya, J.S.  
830 Parboosingh, A.M. Innes, C.E. Willoughby, R.H. Giles, A.R. Webster, M. Ueffing, O.  
831 Blacque, J.G. Gleeson, U. Wolfrum, P.L. Beales, T. Gibson, D. Doherty, H.M. Mitchison, R.  
832 Roepman, and C.A. Johnson. 2015. An siRNA-based functional genomics screen for the  
833 identification of regulators of ciliogenesis and ciliopathy genes. *Nature Cell Biology*. 17:1074–  
834 1087. doi:10.1038/ncb3201.
- 835 Wilson, C.W., M.-H. Chen, and P.-T. Chuang. 2009. Smoothed adopts multiple active and  
836 inactive conformations capable of trafficking to the primary cilium. *PLoS ONE*. 4:e5182.  
837 doi:10.1371/journal.pone.0005182.
- 838 Wright, K.J., L.M. Baye, A. Olivier-Mason, S. Mukhopadhyay, L. Sang, M. Kwong, W. Wang, P.R.  
839 Pretorius, V.C. Sheffield, P. Sengupta, D.C. Slusarski, and P.K. Jackson. 2011. An ARL3-  
840 UNC119-RP2 GTPase cycle targets myristoylated NPHP3 to the primary cilium. *Genes Dev*.  
841 25:2347–2360. doi:10.1101/gad.173443.111.
- 842 Xie, Y., Y. Zheng, H. Li, X. Luo, Z. He, S. Cao, Y. Shi, Q. Zhao, Y. Xue, Z. Zuo, and J. Ren. 2016.  
843 GPS-Lipid: a robust tool for the prediction of multiple lipid modification sites. *Scientific Reports*.  
844 6:28249. doi:10.1038/srep28249.
- 845 Yang, N., L. Li, T. Eguether, J.P. Sundberg, G.J. Pazour, and J. Chen. 2015. Intraflagellar transport  
846 27 is essential for hedgehog signaling but dispensable for ciliogenesis during hair follicle  
847 morphogenesis. *Development (Cambridge, England)*. doi:10.1242/dev.115261.
- 848 Ye, F., A.R. Nager, and M.V. Nachury. 2018. BBSome trains remove activated GPCRs from cilia by  
849 enabling passage through the transition zone. *J. Cell Biol.* 217:1847–1868.  
850 doi:10.1083/jcb.201709041.
- 851 Ye, H., X. Wang, M.M. Constans, C.R. Sussman, F.T. Chebib, M.V. Irazabal, W.F. Young, P.C.  
852 Harris, L.S. Kirschner, and V.E. Torres. 2017. The regulatory 1 $\alpha$  subunit of protein kinase A  
853 modulates renal cystogenesis. *Am. J. Physiol. Renal Physiol.* 313:F677–F686.  
854 doi:10.1152/ajprenal.00119.2017.
- 855
- 856



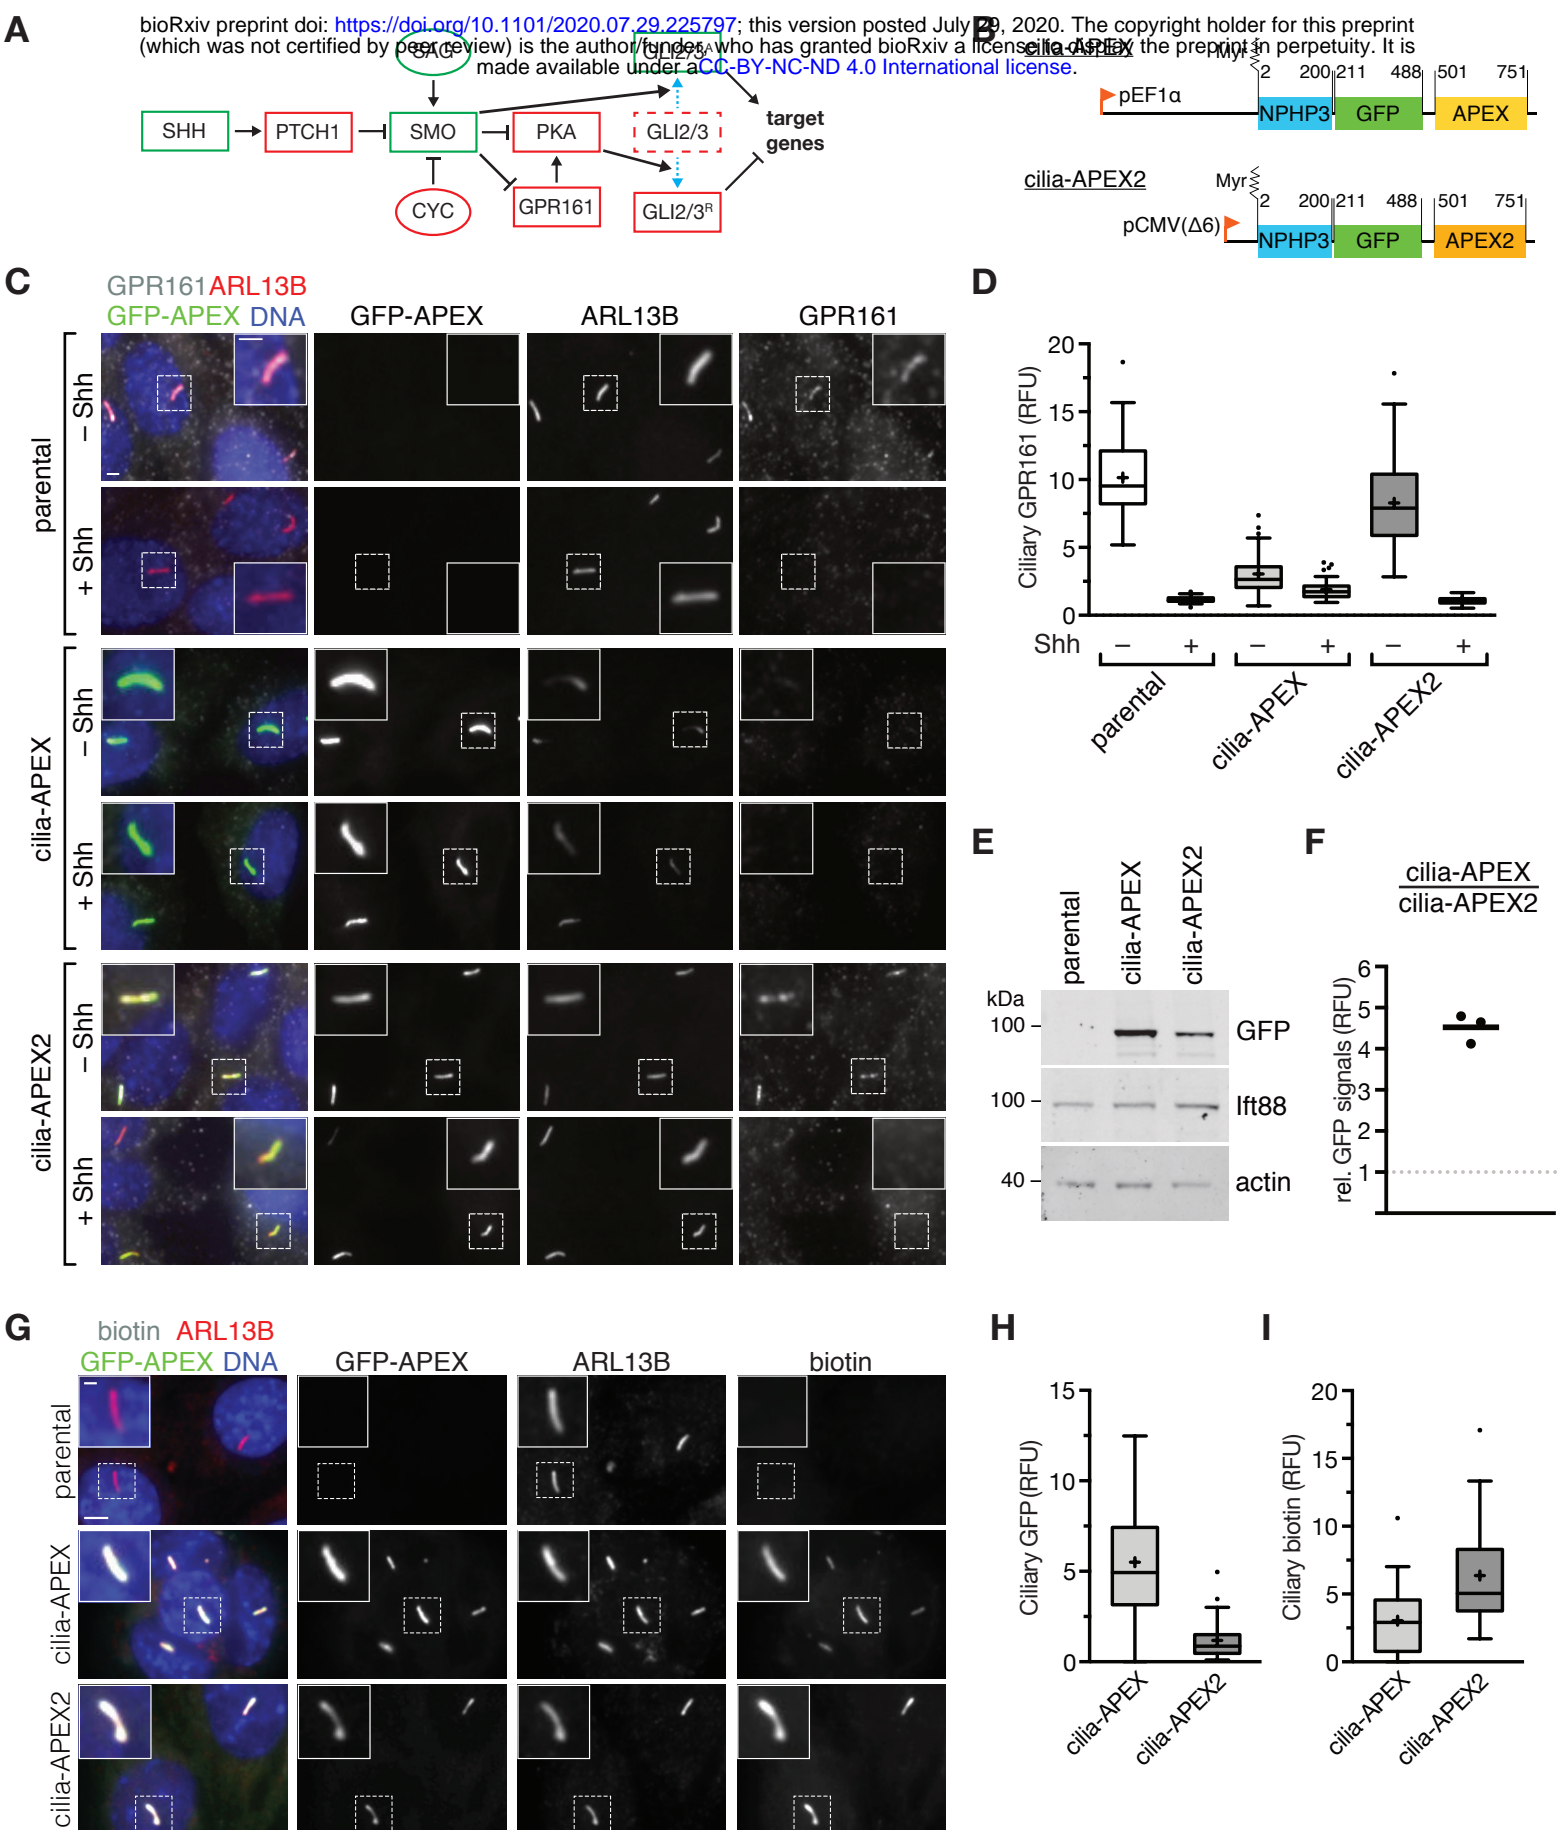

857 Figure 1. **An IMCD3 cell line expressing cilia-APEX2 at low levels efficiently labels**  
858 **proteins of the primary cilium without disrupting ciliary localization of Hh signaling**  
859 **components.**

860 **(A)** Schematic overview of the key Sonic Hedgehog signaling components. Positive and negative  
861 regulators are indicated in green and red boxes, respectively. Pharmacological agents used in this study  
862 are displayed in ovals. Smoothed agonist (SAG) activates the pathway, while cyclopamine (CYC)  
863 inhibits the pathway at the level of SMO.

864 **(B)** Diagram of the *cilia-APEX* and *cilia-APEX2* transgenes. Both contain a cilia-targeting signal based  
865 on the N-terminus of NPHP3, which is myristoylated at a glycine residue at position 2 (Myr), followed  
866 by a GFP moiety. Numbers indicate amino acid positions. *cilia-APEX* is expressed from an EF1a  
867 promoter (pEF1a), *cilia-APEX2* from a truncated CMV promoter (pCMV( $\Delta$ 6)) for reduced expression.

868 **(C)** Immunofluorescence of parental IMCD3 cells and of stable clones expressing *cilia-APEX* or *cilia-*  
869 *APEX2*. Cells were serum-starved for 24 h in the presence or absence of Sonic Hedgehog-conditioned  
870 medium (Shh), fixed and stained for GPR161 (white) and ARL13B (red) using specific antibodies. Cilia-  
871 APEX and *cilia-APEX2* were visualized via the intrinsic fluorescence of GFP (green). DNA was stained  
872 with DAPI (blue). Representative micrographs are shown for each condition.

873 **(D)** Box plots showing the relative GPR161 fluorescence normalized to ARL13B in the primary cilium  
874 of parental, *cilia-APEX* and *cilia-APEX2* cell lines after Shh treatment as in **(A)**. 50 cilia were analyzed  
875 for each condition (n = 50). In these and all subsequent box plots, crosses indicate mean values,  
876 whiskers indicate values within 1.5x interquartile range and dots represent outliers.

877 **(E)** Cell lysates of parental, *cilia-APEX* and *cilia-APEX2* cell lines were resolved by SDS-PAGE and  
878 analyzed by quantitative immunoblotting using indicated antibodies. APEX fusion proteins were  
879 detected using anti-GFP antibodies.

880 **(F)** Dot plot showing the ratio of total GFP protein detected in the *cilia-APEX* relative to the *cilia-*  
881 *APEX2* cell line (n = 3).

882 **(G)** Parental, *cilia-APEX* and *cilia-APEX2* IMCD3 cells were subjected to APEX labeling, fixed and  
883 stained for ARL13B (red) and biotin (white). Cilia-APEX and *cilia-APEX2* were visualized via the  
884 intrinsic fluorescence of GFP (green). DNA was stained with DAPI (blue). Representative micrographs  
885 are shown.

886 **(H and I)** Box plots showing background-subtracted intensities of GFP **(I)** and biotin **(J)** signals in the  
887 primary cilium from images as in **(E)**. 30 cilia were analyzed for each condition (n = 30).

888 Scale bars = 2  $\mu$ m in all panels.

889

**A**

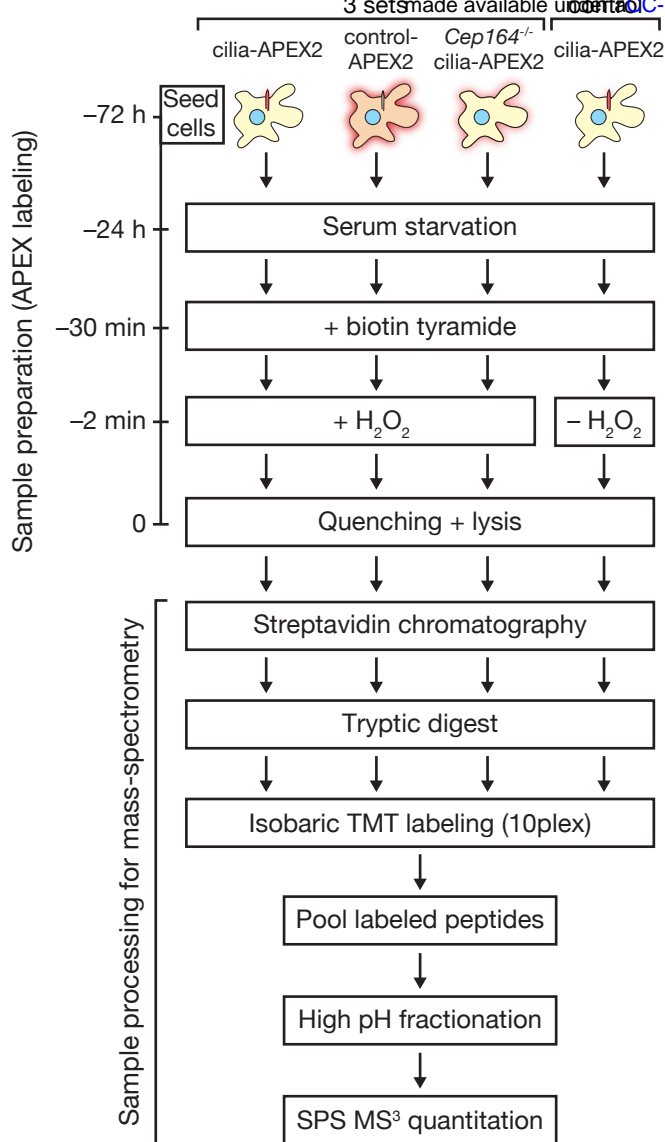

**B**

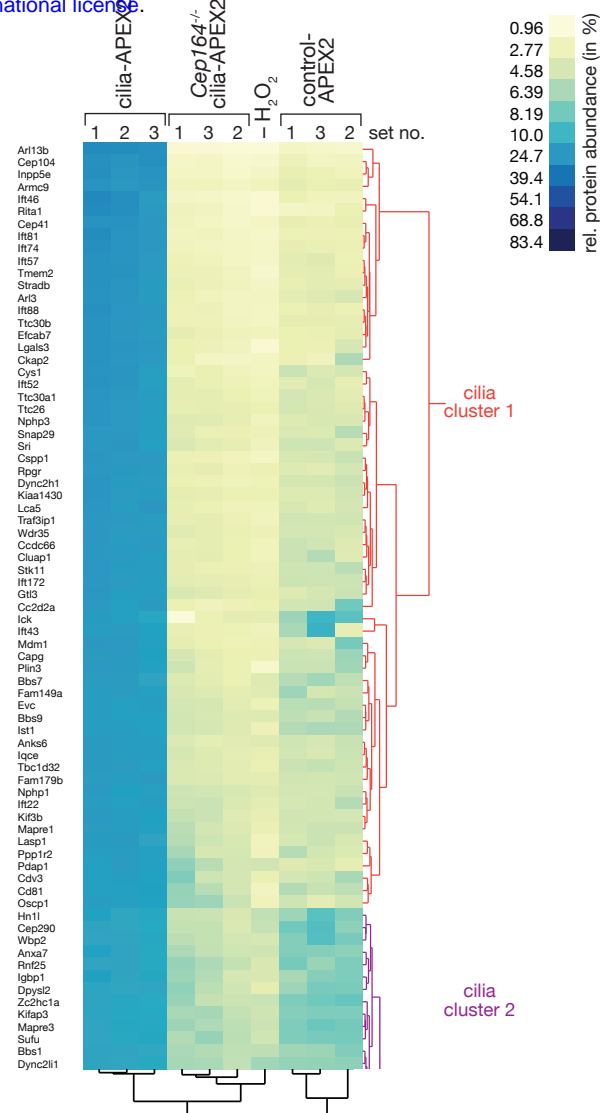

**C**

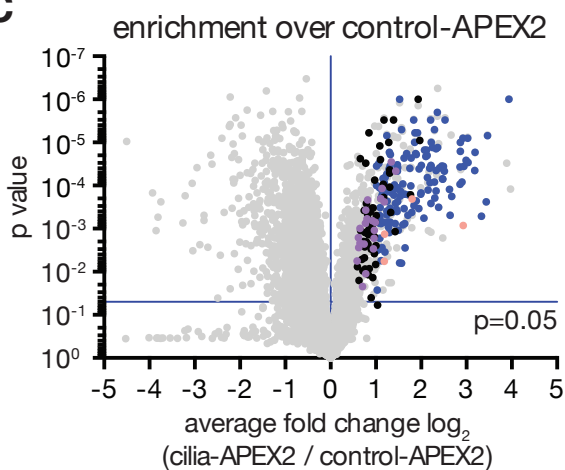

**D**

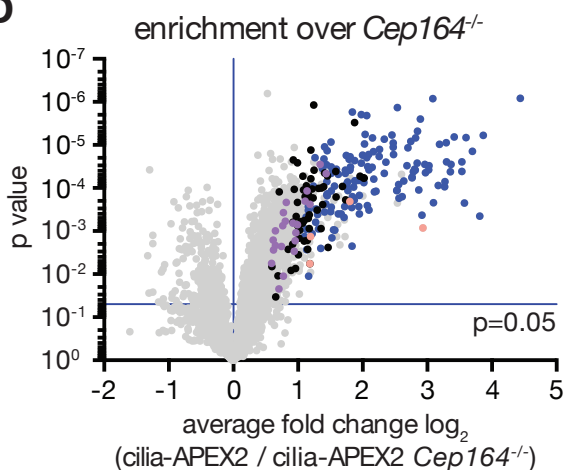

**E**

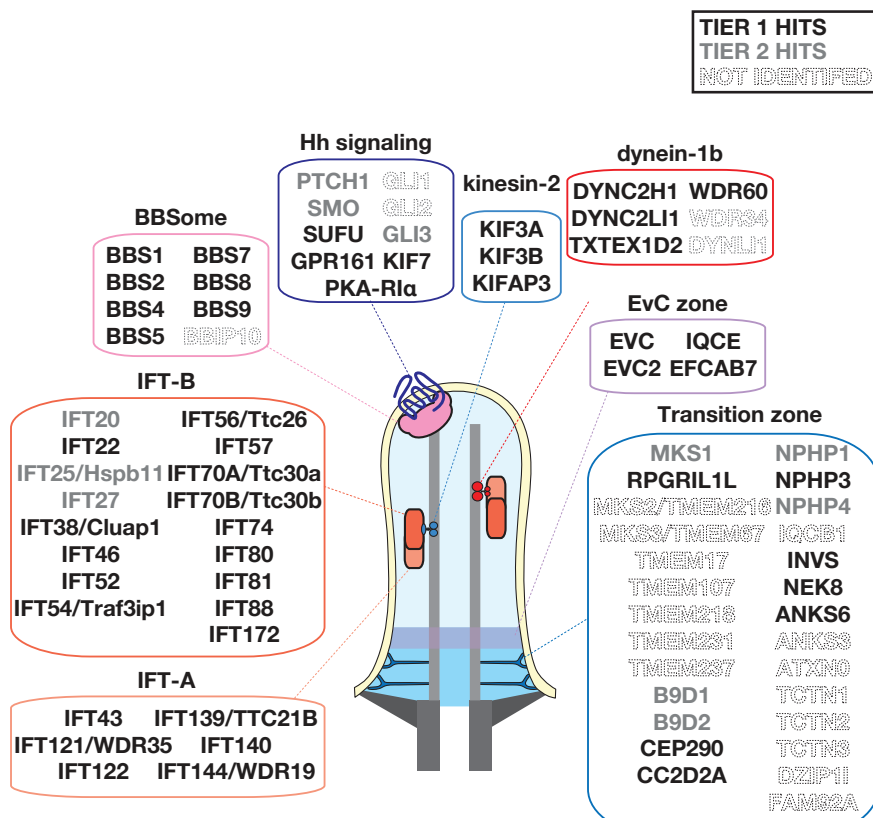



890 Figure 2. **Cilia-APEX2-based proteomics reveals the proteome of primary cilia with high**  
891 **sensitivity.**

892 **(A)** Schematic representation of experimental workflow. Cells were seeded 72 h before the APEX  
893 labeling reaction. Cells were first grown in serum-rich medium for 48 h and then switched to serum-  
894 reduced medium to induce ciliation. APEX labeling was conducted by pre-incubating cells with biotin  
895 tyramide for 30 min and the labeling reaction was then initiated by addition of hydrogen peroxide  
896 ( $H_2O_2$ ) for 2 min. The APEX reaction was then quenched with cyanide, ascorbate and the antioxidant  
897 Trolox and cells put on ice. In one control,  $H_2O_2$  was omitted from the experimental scheme. This last  
898 control was conducted in singlet as all 10 TMT channels were then occupied. After labeling and  
899 quenching, cells were lysed and biotinylated proteins isolated by streptavidin chromatography. Bound  
900 material was extensively washed and tryptic peptides released via on-bead digest. Peptides of each  
901 individual sample were labeled with a unique tandem mass tag (TMT), all samples were pooled, and  
902 peptides were fractionated by offline high pH reversed phase chromatography to generate 12 fractions,  
903 which were analyzed using a synchronous precursor selection (SPS)  $MS^3$  method for mass  
904 spectrometric identification and quantitation.

905 **(B)** Hierarchical two-way cluster analysis of a cilia-APEX2/TMT experiment conducted according to  
906 the scheme outlined in (A). Clustering of the relative abundances of each identified protein (rows) in  
907 the individual samples (columns) was performed based on Ward's minimum variance method. The  
908 relative abundance of a given protein was calculated by dividing the TMT signal to noise ratio in one  
909 sample by the sum of TMT signal to noise ratios in all samples. Legend depicts color scheme for relative  
910 abundances (in %). The clusters containing cilia proteins are shown (see Fig. S1E for full cluster  
911 analysis).

912 **(C and D)** Volcano plots showing protein enrichment in cilia-APEX2 compared to control-APEX2  
913 samples **(C)** or in cilia-APEX2 WT vs. *Cep164<sup>-/-</sup>* samples **(D)**. Average enrichments of cilia-APEX2  
914 samples versus the respective controls were plotted against the calculated  $p$  values (statistical  
915 significance of enrichment calculated from unpaired student's  $t$ -tests). Proteins fulfilling all 4  
916 significance and enrichment criteria are represented by blue dots, proteins that met 3 criteria are  
917 represented by black dots and proteins that failed 2 or more significance criteria are shown in grey (see  
918 text for details). Known cilia proteins outside of significance criteria or quantified from one peptide are  
919 highlighted in purple and salmon, respectively. See Table S1.

920 **(E)** Schematic of a primary cilium with indicated hallmark protein complexes, structures or pathways.  
921 Boxes contain proteins of the respective entities identified as Tier1 (black) or Tier2 (grey) hits of the  
922 cilia-APEX2 proteome. Proteins not identified are indicated by 'ghost' lettering. Proteins names are  
923 shown and Gene symbols added for cases, in which gene symbols in our datasets differ from

924 conventional protein names. Note that Ttc30a1 and Ttc30a1 have been grouped into  
925 IFT70A/Ttc30a.  
926

**A**

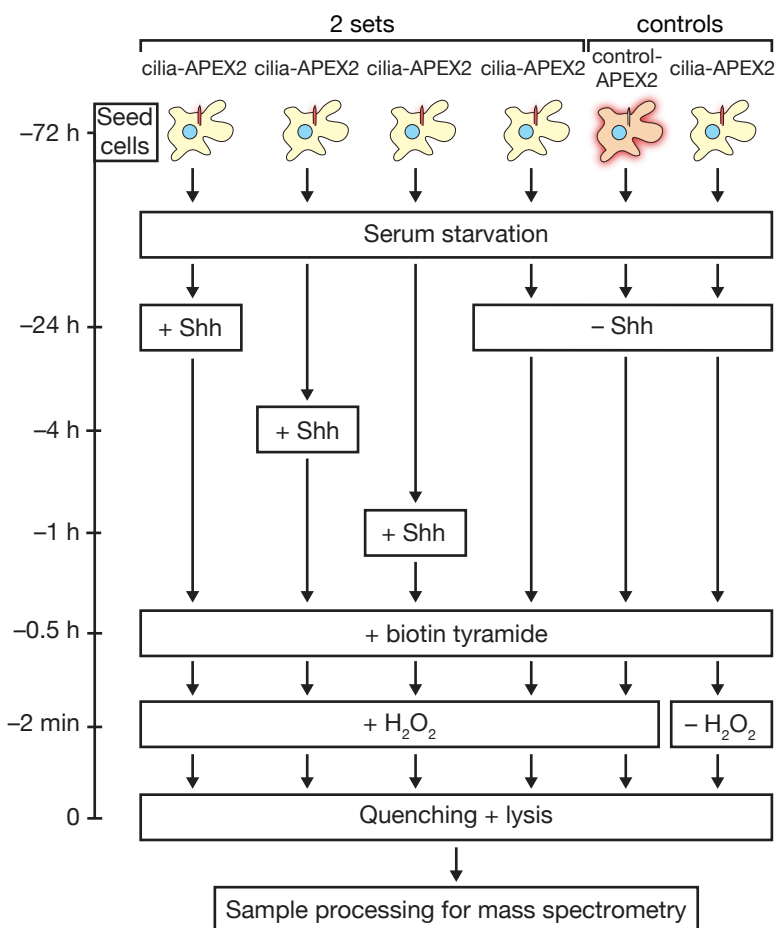

**B**

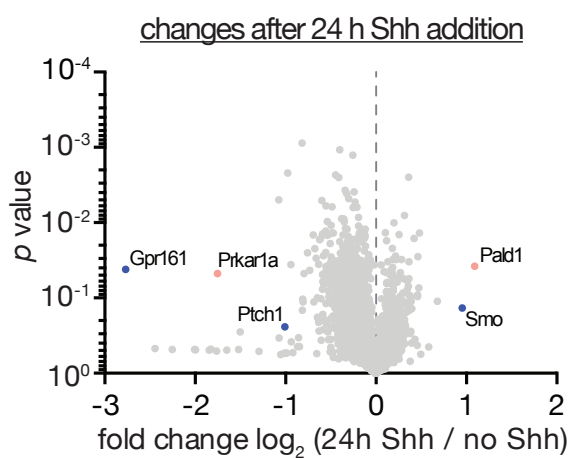

927 Figure 3. **Experimental outline of time-resolved cilia-APEX2 proteomics after Sonic**  
928 **stimulation.**

929 **(A)** Schematic of experimental workflow for time-resolved cilia-APEX2 proteomics. Cilia-APEX2 (and  
930 control-APEX2) expressing IMCD3 cells were seeded 72 h before the APEX labeling reaction. 24 h  
931 before labeling, cells were deprived of serum, and Shh-conditioned medium was added for 24 h, 4 h  
932 or 1 h before labeling (as indicated). ‘-Shh’ indicates addition of conditioned medium without Shh.  
933 APEX labeling and sample preparation were performed as in Fig. 2A.

934 **(B)** Volcano plot showing significance vs. enrichment in 24 h Shh-treated compared to no Shh  
935 samples. Hh signaling components known to change their ciliary localization are shown in blue,  
936 proteins with newly identified changes are shown in orange.

937

**A**

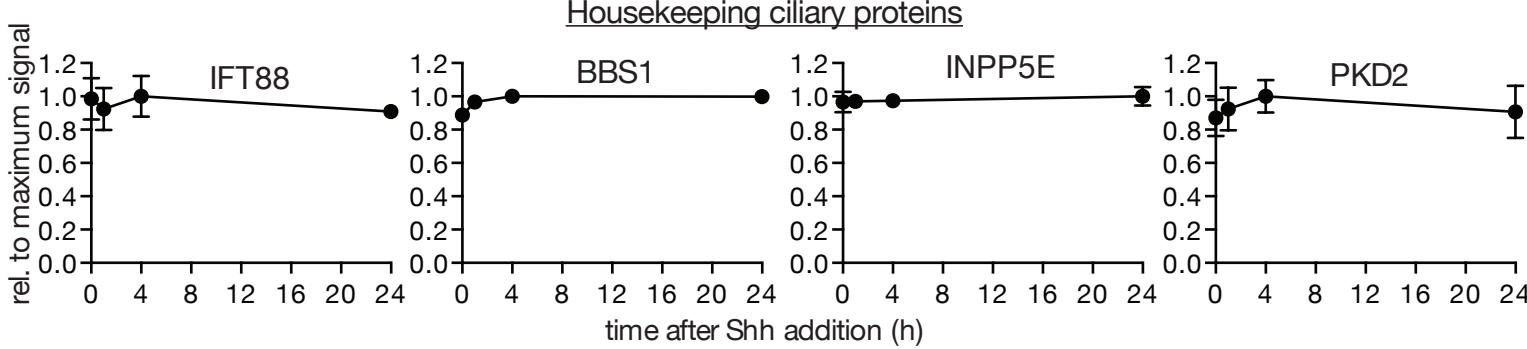

**B**

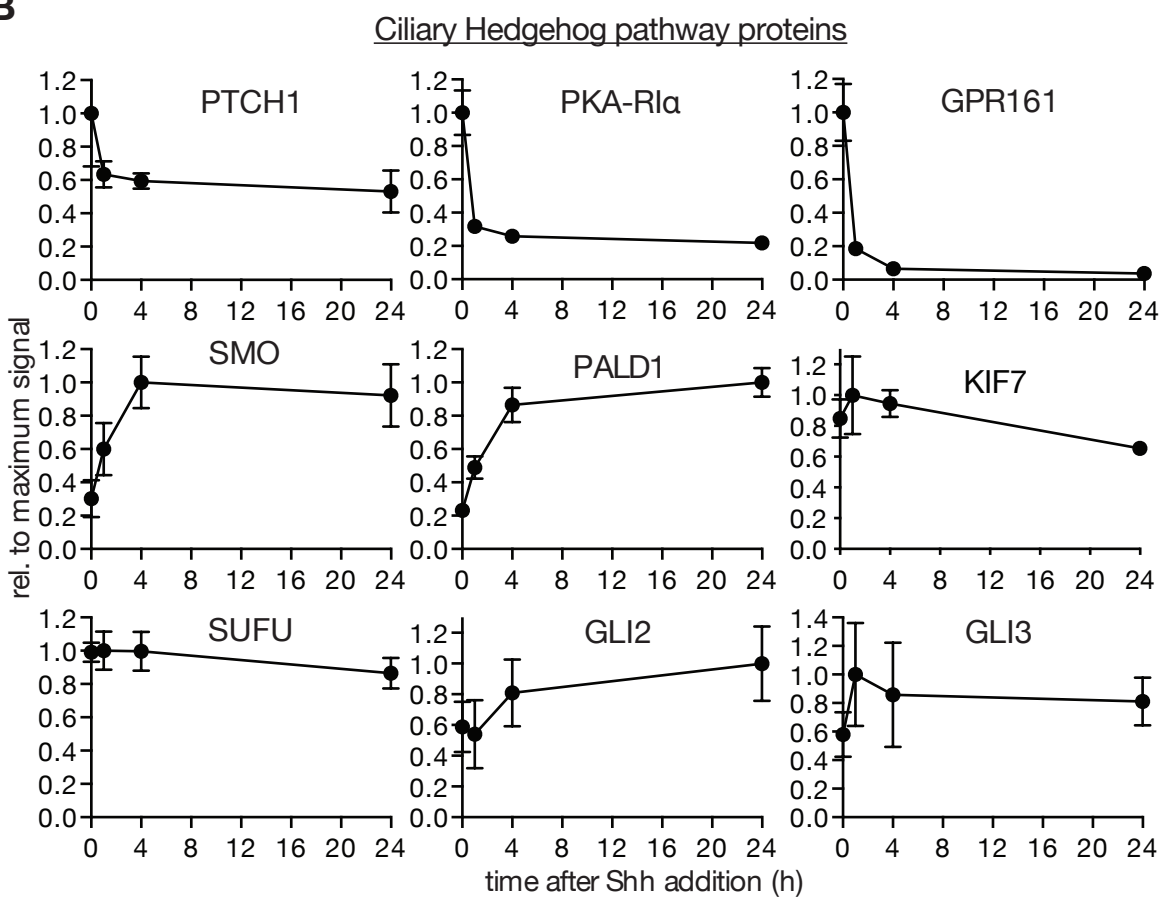

**C**

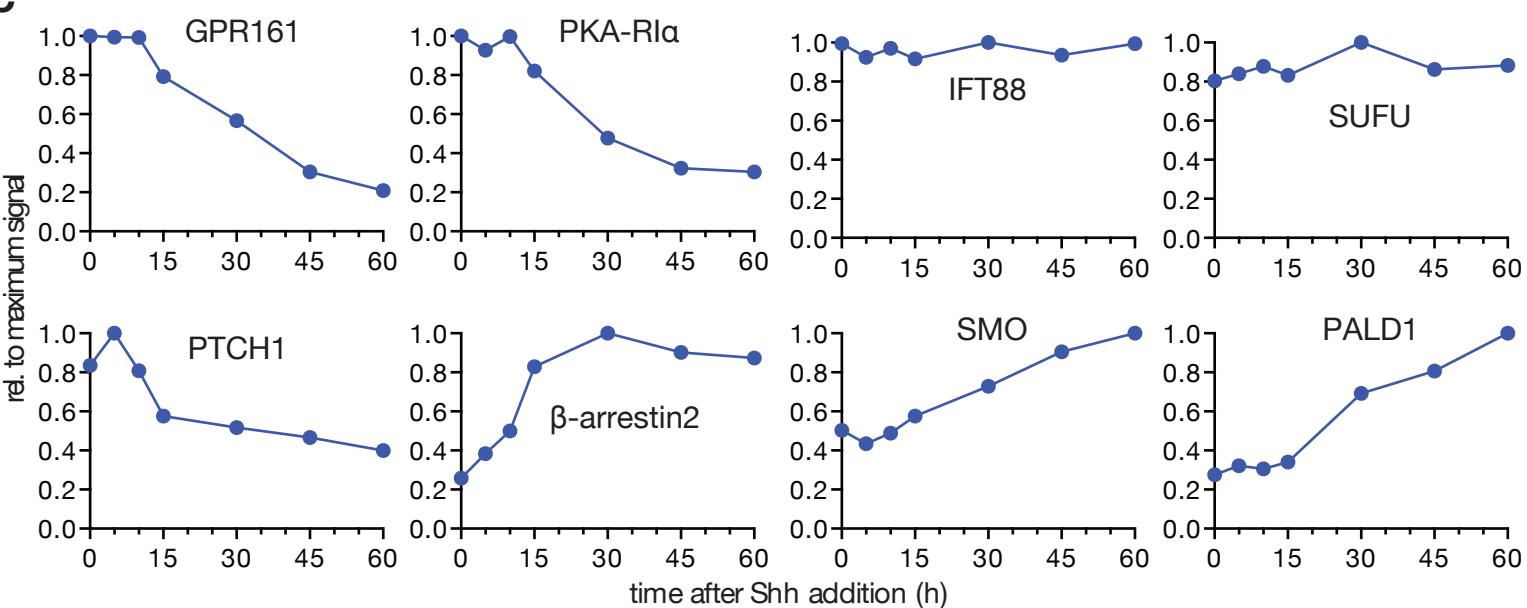

938 Figure 4. **Time-resolved cilia-APEX2 proteomics reveals the extent of ciliary proteome**  
939 **dynamics in response to Sonic Hedgehog.**

940 **(A)** Relative protein abundances in primary cilia assessed by mass-spectrometric TMT quantitation  
941 were plotted over time. Data points represent averages of duplicate measurements, error bars depict  
942 individual values. Error bars smaller than indicated datapoint symbols have been omitted. For each  
943 individual protein, the background signal in the control-APEX2 sample was set to 0 and the maximum  
944 average signal across all time points was set to 1. 0 h, represents –Shh as in (Fig. 3A).

945 **(B)** Hh signaling components change their abundance in cilia in response to Shh addition. Relative  
946 abundances of indicated proteins in primary cilia are plotted over time as in **(A)**.

947 **(C)** Relative abundances of indicated proteins in primary cilia were assessed by cilia-APEX2/TMT  
948 proteomics at indicated timepoints after Shh addition (see Fig. S3). Normalized intensities (relative to  
949 ARL13B) were plotted over time. Maximum signals were set to 1, TMT signals in control samples set  
950 to 0. t= 0 corresponds to the ‘–Shh’ sample.

951

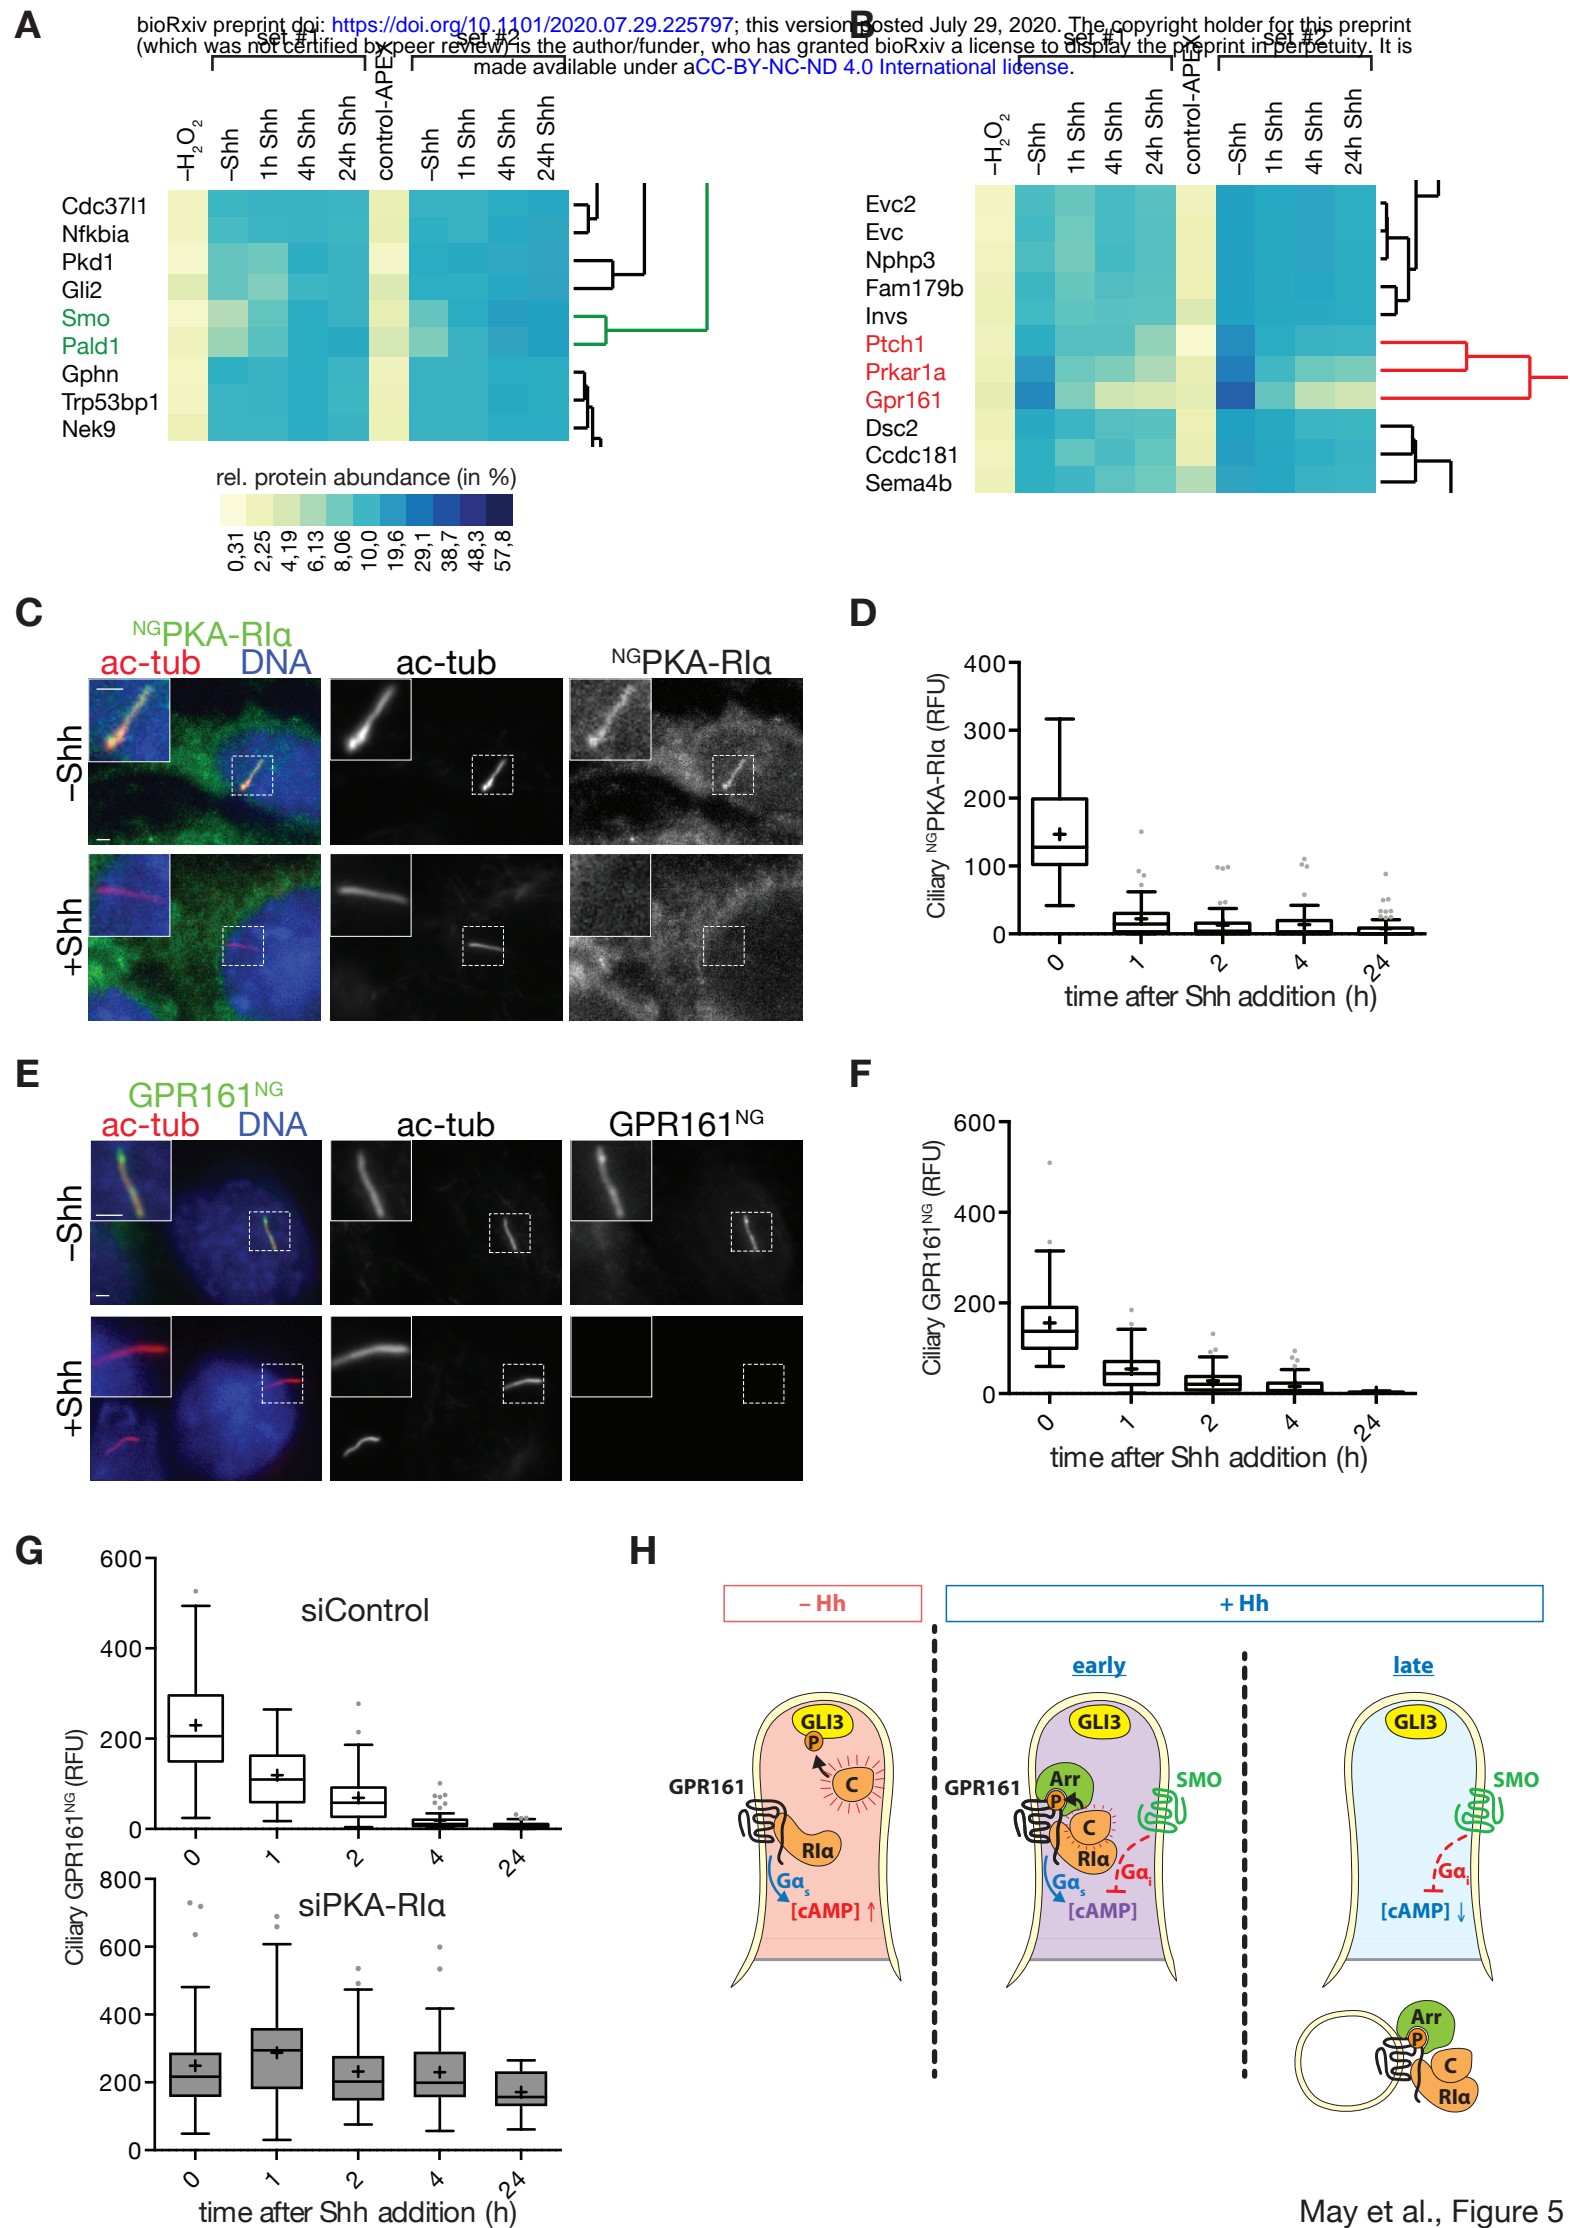

952 Figure 5. **Hierarchical cluster analysis reveals ciliary exit of PKA-R1 $\alpha$  together with**  
953 **GPR161 in response to Hedgehog signal.**

954 (A) and (B) Hierarchical cluster analysis of the two sets of time-resolved cilia-APEX2 proteomics  
955 experiments conducted following the scheme in Fig. 3A. (A) Magnified view of the SMO mini-cluster  
956 (green) and neighboring branches. (B) Magnified view of the GPR161 mini-cluster (red) and  
957 neighboring branches. *Prkar1a* is the gene name for PKA-R1 $\alpha$ . The complete clustering analysis is  
958 shown in Fig. S2A.

959 (C) IMCD3 cells stably expressing mNeonGreen-tagged PKA-R1 $\alpha$  (<sup>NG</sup>PKA-R1 $\alpha$ ) were serum-starved  
960 for 24 h and treated with conditioned medium with or without Shh. Cells were fixed and stained for  
961 acetylated tubulin (ac-tub, red) and DNA (blue). <sup>NG</sup>PKA-R1 $\alpha$  was visualized by the intrinsic  
962 fluorescence of mNeonGreen (green).

963 (D) Box plot showing background-corrected <sup>NG</sup>PKA-R1 $\alpha$  fluorescence in cilia at indicated timepoints  
964 after Shh addition. 60 cilia (n=60) were analyzed for each time point.

965 (E) IMCD3 cells expressing GPR161<sup>NG</sup> were treated and analyzed as in (C). GPR161<sup>NG</sup> was visualized  
966 via the intrinsic fluorescence of mNeonGreen.

967 (F) Box plot showing background corrected ciliary GPR161<sup>NG</sup> signal at indicated timepoints after Shh  
968 addition. 60 cilia (n=60) were analyzed for each time point.

969 (G) Box plots showing background corrected GPR161<sup>NG</sup> fluorescence signals in the primary cilium of  
970 cells transfected with siRNA against *Prkar1a* or control siRNA at indicated times after Shh addition. 60  
971 cilia were analyzed for each condition (n = 60) as in Fig. 4D.

972 All scale bars represent 2  $\mu$ m.

973 (H) Model of the functional interaction between GPR161, PKA and SMO inside cilia. In unstimulated  
974 cells (-Hh), GPR161 keeps [cAMP]<sub>cilia</sub> high via activation of G  $\alpha$ <sub>s</sub>. GPR161-bound PKA-R1 $\alpha$  releases  
975 the fully active catalytic PKA subunits (C) into the lumen of cilia. Early after pathway activation (+Hh,  
976 early), SMO begins to accumulate in cilia and lowers [cAMP]<sub>cilia</sub> via G  $\alpha$ <sub>i</sub> activation. This leads to the  
977 association of the PKA-C with PKA-R1 $\alpha$  to form a partially active holoenzyme that locally  
978 phosphorylates the GPR161 C-terminal tail. GPR161 phosphorylation results in the exit of GPR161  
979 from cilia together with a bound PKA holoenzyme (+Hh, late). The removal of GPR161 from cilia  
980 eliminates the source of tonic G  $\alpha$ <sub>s</sub> activation, which leads to a further reduction of [cAMP]<sub>cilia</sub>. 'Arr'  
981 indicates  $\beta$ -arrestin2.

982



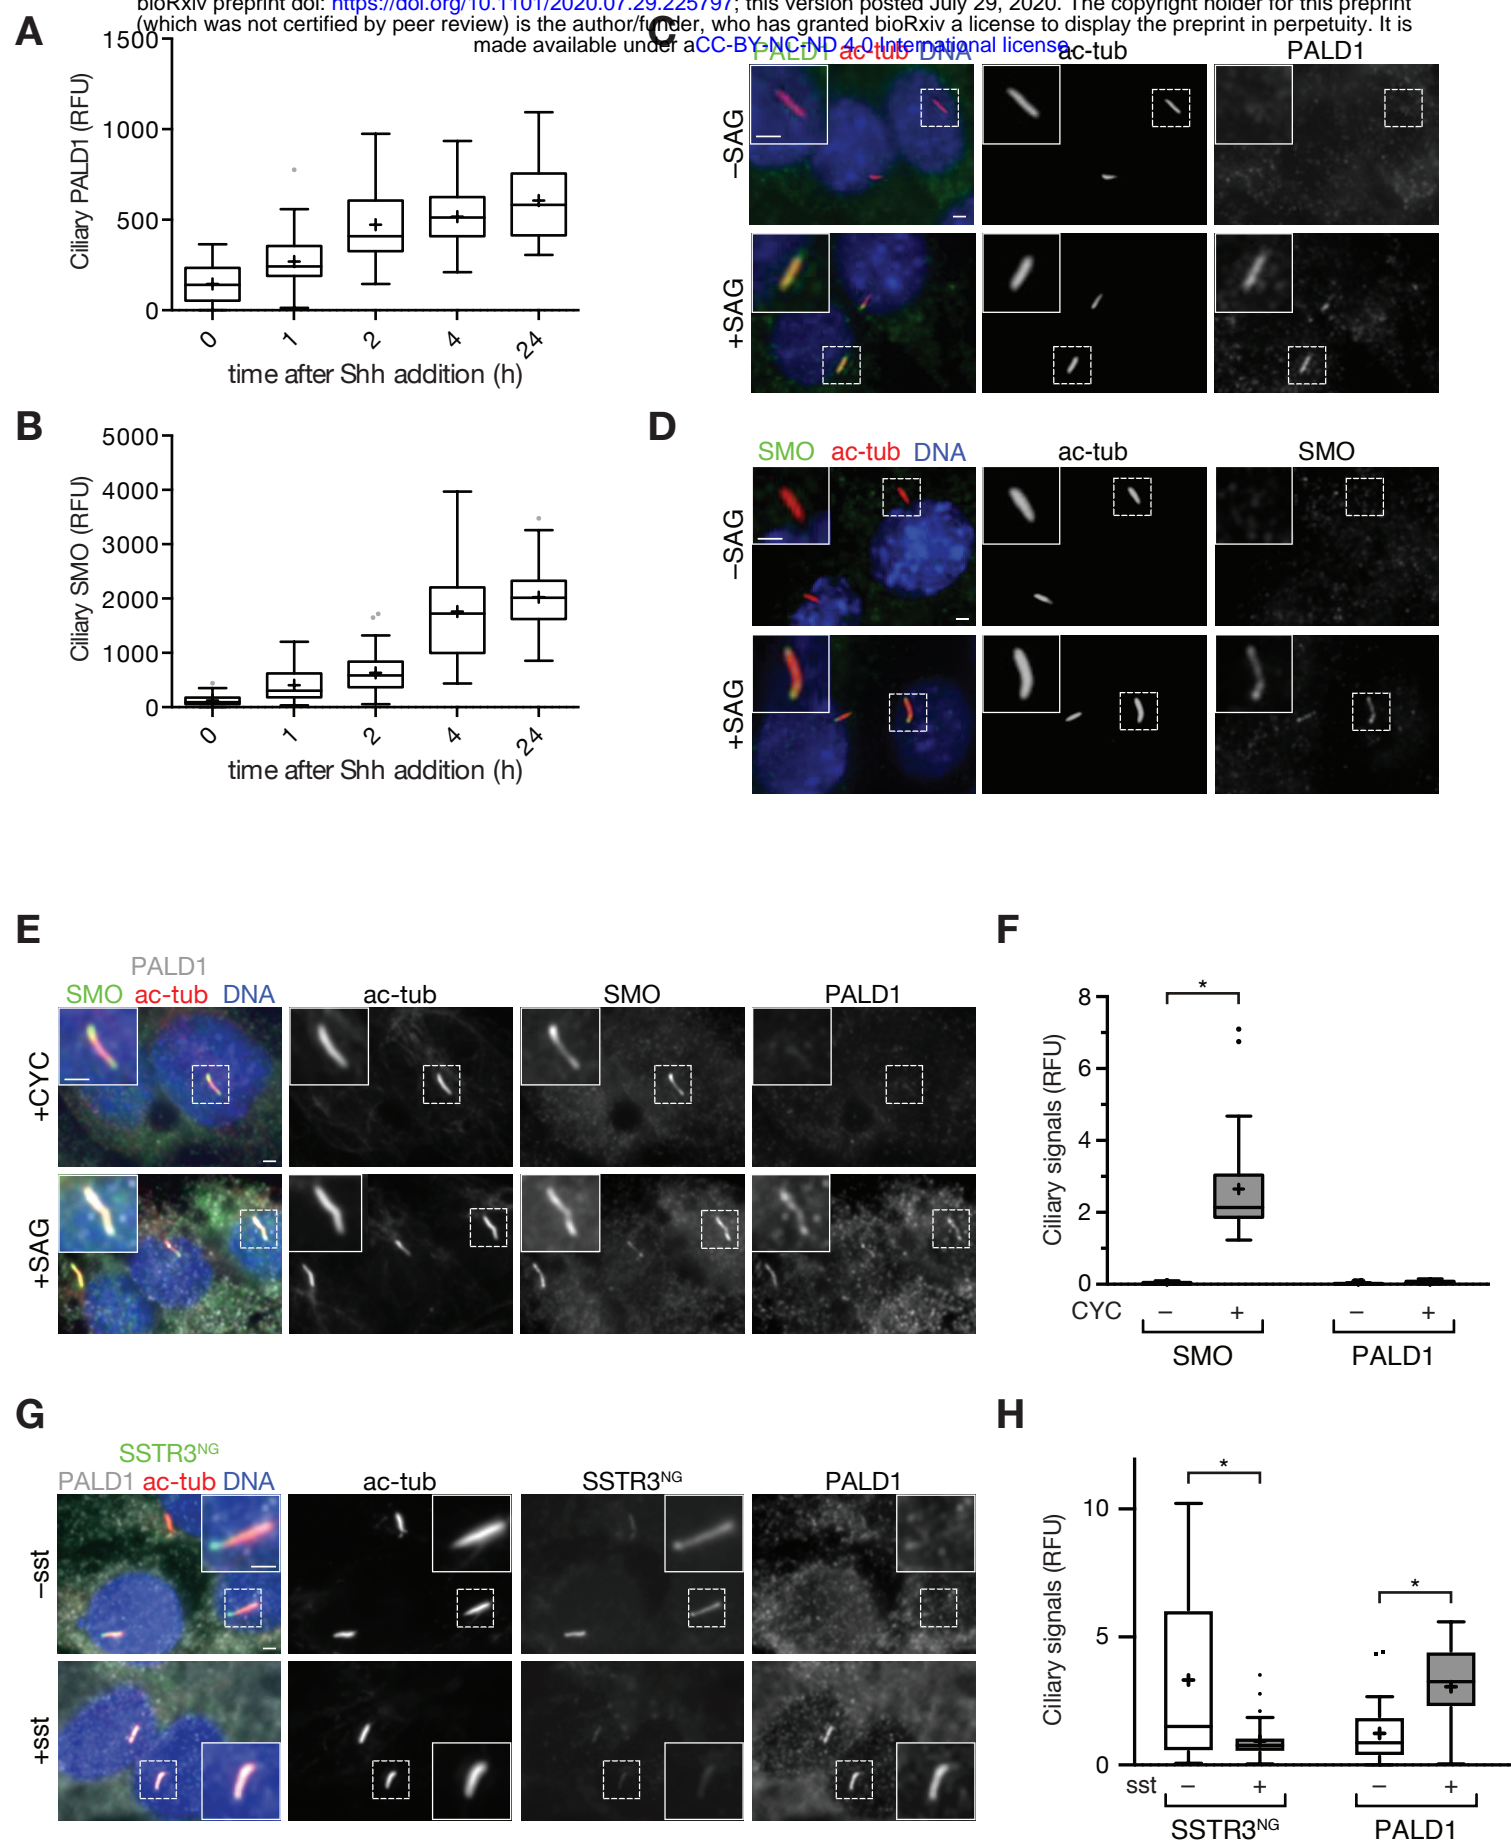

983 Figure 6. **PALD1 accumulates in primary cilia in response to ciliary  $G\alpha_i$  activation.**  
984 **(A and B)** IMCD3 cells were serum-starved for 24 h and treated with Shh for indicated times before  
985 fixation and staining for PALD1 **(A)** or SMO **(B)**. Box plots display the background-corrected signals  
986 of PALD1 and SMO in primary cilia. 59 cilia were analyzed for each condition (n = 59).  
987 **(C and D)** IMCD3 cells were serum-starved and treated with or without SAG for 24 h and analyzed  
988 by immunofluorescence microscopy using indicated antibodies.  
989 **(E and F)** IMCD3 cells were serum-starved and treated with cyclopamine (+CYC) or SAG for 24 h  
990 and analyzed as in (C and D). **(E)** Micrographs of representative images. **(F)** Box plots showing  
991 background-corrected, relative ciliary fluorescence intensities of respective proteins normalized to  
992 acetylated tubulin signals. 30 cilia were analyzed for each condition (n = 30). Data was analyzed using  
993 two-way ANOVA with multiple comparisons (Tukey test) with a defined confidence of 95%. \*, p <  
994 0.05.  
995 **(G and H)** IMCD3 cells stably expressing Sstr3<sup>NG</sup> were serum-starved for 24 h in the presence or  
996 absence of 10  $\mu$ M somatostatin and analyzed as in (E and F) (n = 30). Sstr3<sup>NG</sup> was detected by  
997 mNeonGreen fluorescence. Data analyzed using two-way ANOVA with multiple comparisons (Sidak  
998 test) with a defined confidence of 95%. \*, p < 0.05; n.s., not significant.  
999 All scale bars represent 2  $\mu$ m.

1000

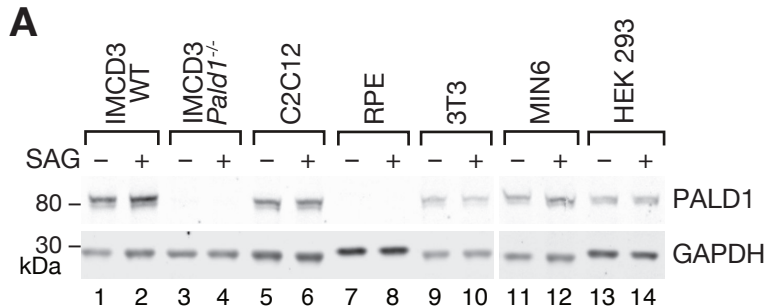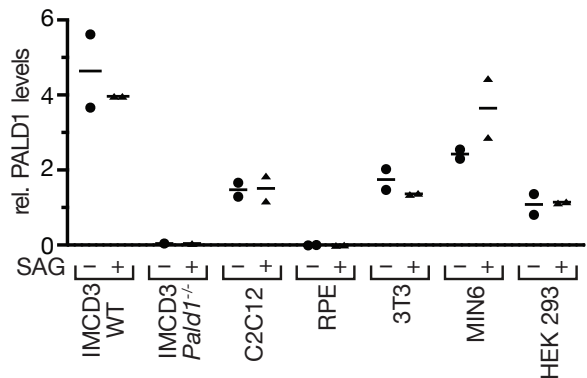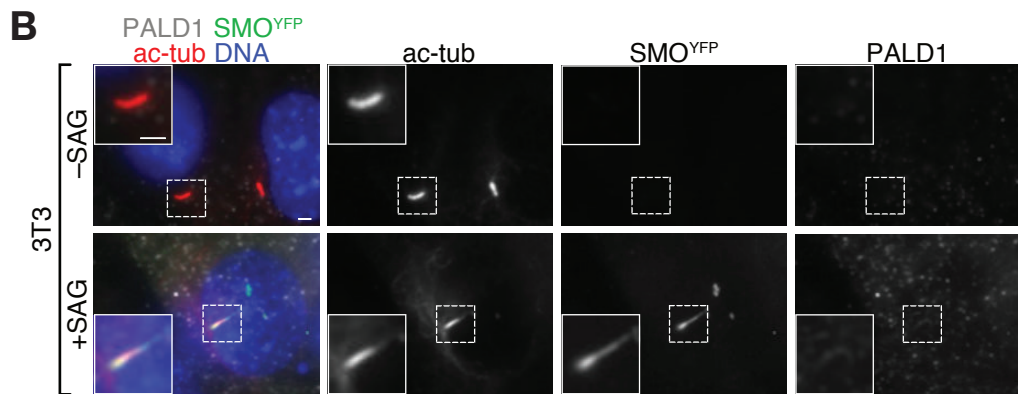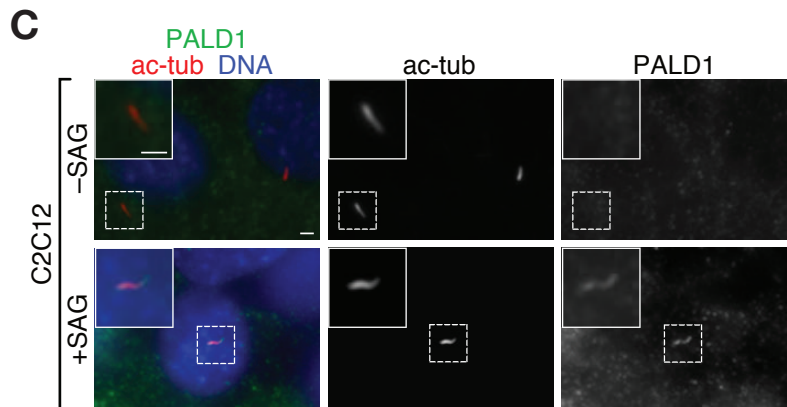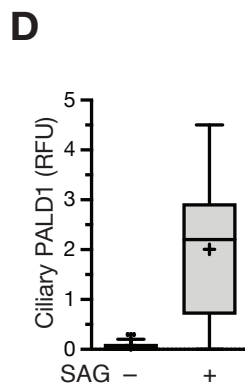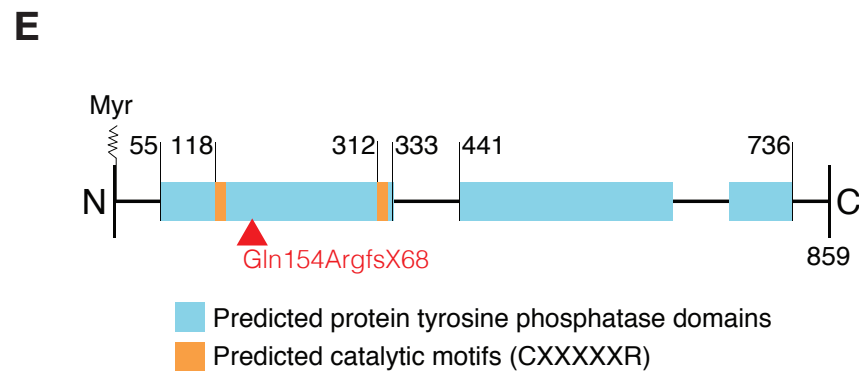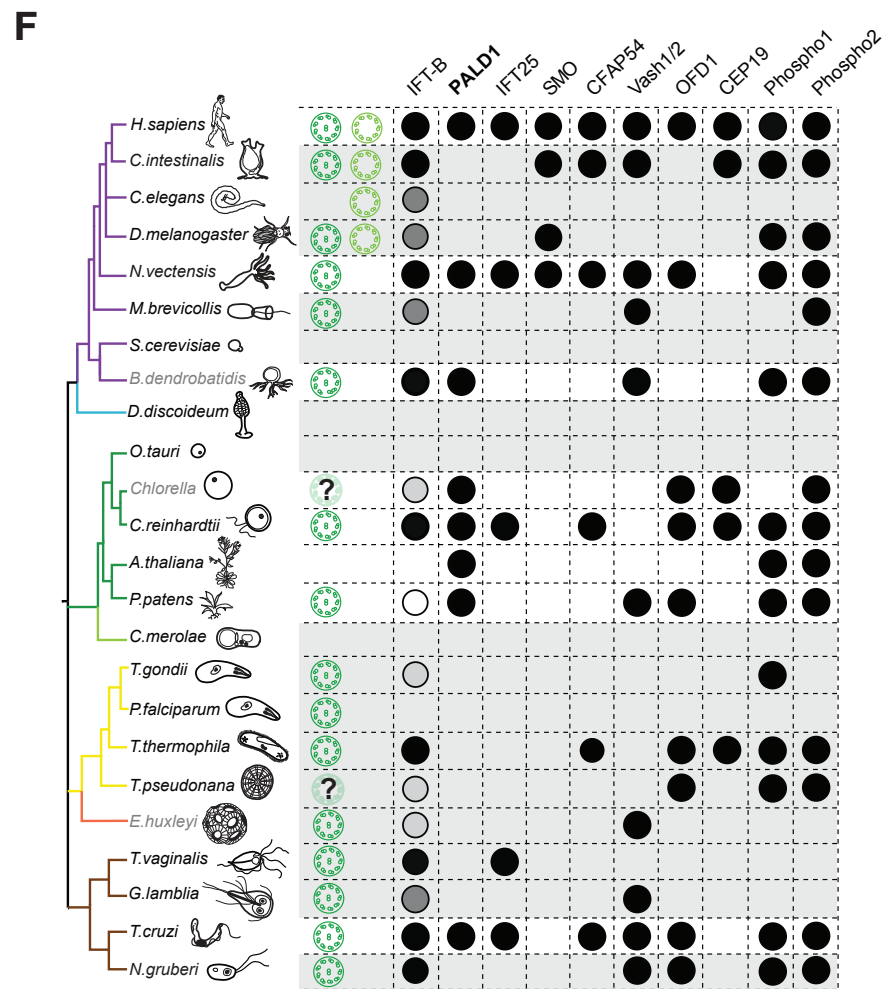

l001 Figure 7. **PALD1 accumulates in primary cilia of selected cell types upon Hh pathway**  
l002 **activation.**

l003 **(A)** Cell lysates of indicated cell lines were separated by SDS-PAGE and analyzed by quantitative  
l004 Western blotting using anti-PALD1 antibody and anti-GAPDH as loading control. Dot plot indicates  
l005 PALD1 protein levels relative to GAPDH in presence or absence of SAG as indicated (n = 2 except  
l006 for for *PALD1*<sup>-/-</sup> where n = 1). Mean values are indicated by horizontal lines.

l007 **(B)** PALD1 does not detectably accumulate in primary cilia of 3T3 cells after Hh pathway activation  
l008 whereas SMO does. 3T3 cells expressing <sup>YFP</sup>SMO (Rohatgi et al., 2009) were serum-starved and  
l009 treated with or without SAG for 24 h and analyzed by immunofluorescence microscopy using indicated  
l010 antibodies. SMO was detected by YFP fluorescence. Scale bars = 2 μm.

l011 **(C and D)** PALD1 is enriched in C2C12 myoblast primary cilia after Hh pathway activation. C2C12  
l012 cells were treated and analyzed as in (B). Box plots show background-corrected, relative fluorescence  
l013 normalized to acetylated tubulin signals. 30 cilia were analyzed for each condition (n = 30).

l014 **(E)** Schematic representation of PALD1 protein. Predicted protein domains and post-translational  
l015 modifications. Numbers indicate amino acid positions in *Mus musculus* PALD1, Myr depicts  
l016 myristoylation site at the N-terminus. Red arrow indicates location of missense mutation in *PALD1*<sup>-/-</sup>  
l017 cells (see Fig. S4).

l018 **(F)** Phylogenetic analysis of PALD1 orthologs and co-conserved proteins (IFT25, CFAP54, Vash1/2,  
l019 OFD1, CEP19, Phospho1/2) identified by Clustering by Inferred Models of Evolution (CLIME) (Li et  
l020 al., 2014). The strongest co-conservation with PALD1 was observed for IFT25 (a mobile subunit of the  
l021 IFT-B complex). Shown is a simplified taxonomic tree with crown eukaryotic groups in different colors  
l022 (modified from (Carvalho-Santos et al., 2010)). Branch color code: purple, opisthokonts; blue,  
l023 amebozoa; green, plants; yellow, alveolates and heterokonts; orange, haptophytes; and brown,  
l024 excavates. When present in the respective organism, motile cilia are shown in green and primary cilia  
l025 in blue. The presence of cilia in *T. pseudomonas* remains controversial. The presence of the  
l026 corresponding proteins is indicated by black circles. Conservation of IFT-B complex subunits are  
l027 depicted by circles with shades of grey that correspond to percentage of subunits, for which orthologs  
l028 are found (black, 100%; dark grey <100%; light grey, <60%; white, <30%). The presence of orthologs  
l029 was determined by CLIME, except for *B. dendrobatidis*, *Chlorella*, *E. huxleyi*, which were analyzed by  
l030 BLASTp (blast.ncbi.nlm.nih.gov). Proteins with E-values ≤ E-25 were scored as hits.

l031

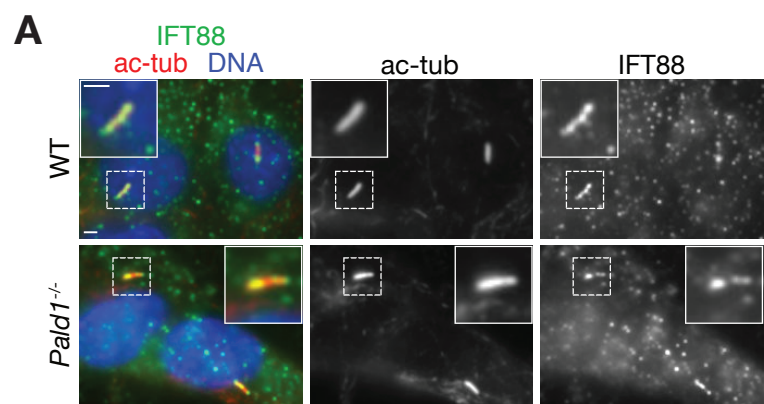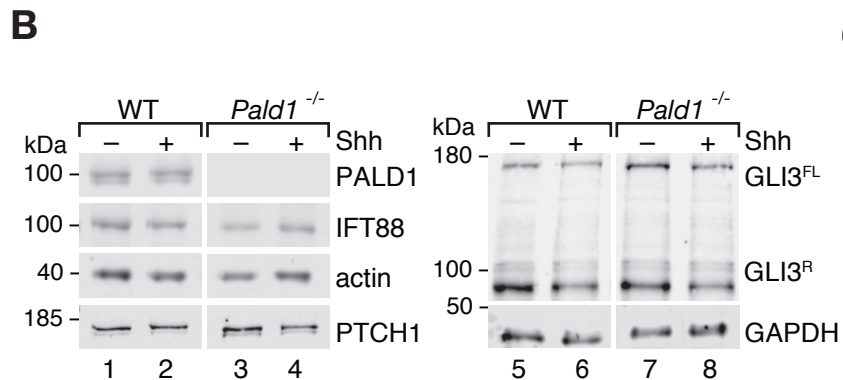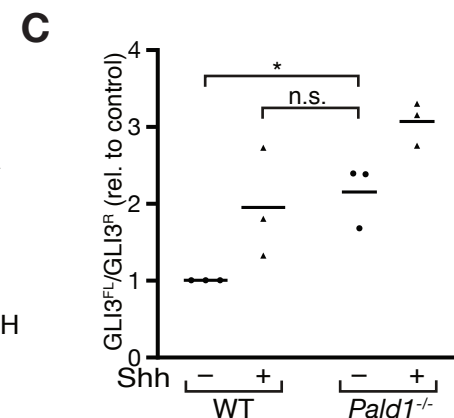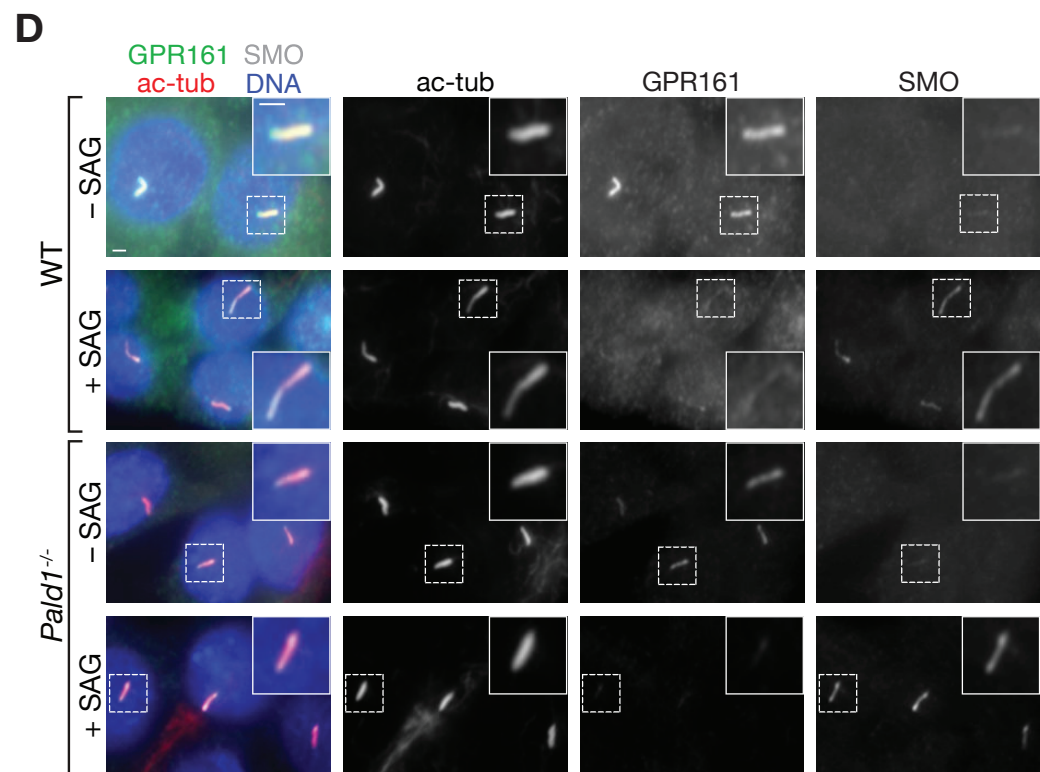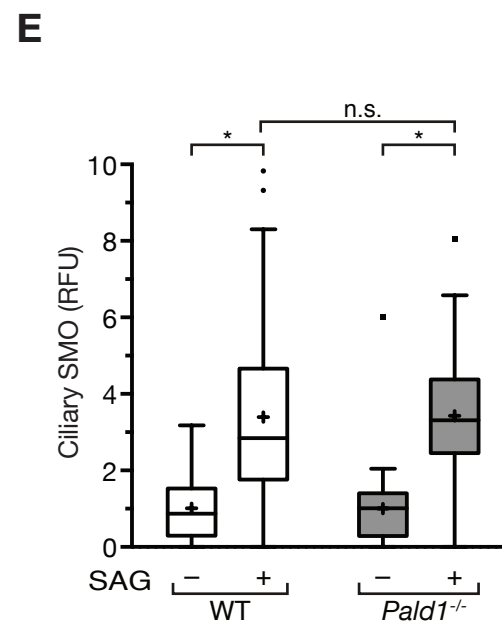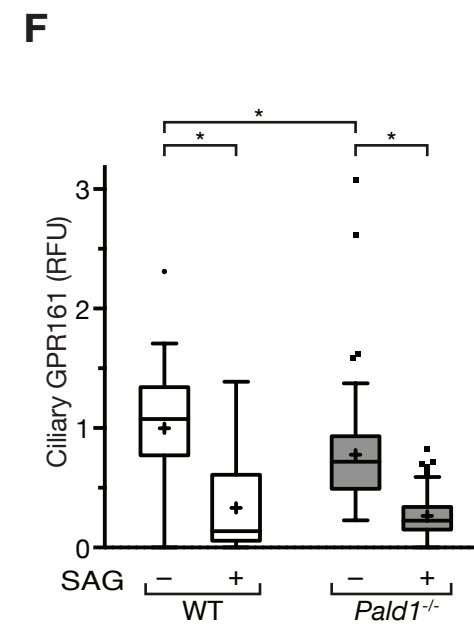



l032 Figure 8. **PALD1 is required for efficient GLI3 repressor formation in IMCD3 cells.**  
l033 **(A)** *Pald1*<sup>-/-</sup> and parental IMCD3 cells were serum-starved for 24 h and analyzed by  
l034 immunofluorescence microscopy using indicated antibodies.  
l035 **(B)** Lysates of wild-type and *Pald1*<sup>-/-</sup> IMCD3 cells cultured in the presence or absence of Shh were  
l036 separated by SDS-PAGE and analyzed by immunoblotting using indicated antibodies. GLI3 repressor  
l037 (GLI3<sup>R</sup>) and full-length (GLI3<sup>FL</sup>) forms are indicated.  
l038 **(C)** GLI3<sup>R</sup> and GLI3<sup>FL</sup> signals from 3 independent experiments as in (B) were quantified and  
l039 GLI3<sup>FL</sup>/GLI3<sup>R</sup> ratios plotted. Horizontal lines depict means (n = 3). Each experiment was internally  
l040 normalized to the GLI3<sup>FL</sup>/GLI3<sup>R</sup> ratio in WT in the absence of signal (WT –Shh GLI3<sup>FL</sup>/GLI3<sup>R</sup> ratio  
l041 = 1). Data were analyzed using two-way ANOVA with multiple comparisons in a Tukey test with a  
l042 defined confidence of 95%. \*, p < 0.05; n.s., not significant.  
l043 **(D)** WT and PALD1-deficient IMCD3 cells were serum-starved and treated with Smoothed agonist  
l044 (SAG) for 24 h (as indicated) and analyzed as in (A).  
l045 **(E)** and **(F)** Box plots showing background-corrected, relative fluorescence normalized to acetylated  
l046 tubulin signals. **(E)** Two independent experiments were performed and 30 cilia were analyzed for each  
l047 condition in each experiment (n = 60). **(F)** Three independent experiments were performed and 30  
l048 cilia were analyzed for each condition in each experiment (n = 90). Data were analyzed using two-way  
l049 ANOVA with multiple comparisons in a Tukey test with a defined confidence of 95%. \*, p < 0.05;  
l050 n.s., not significant.  
l051 All scale bars represent 2 μm.



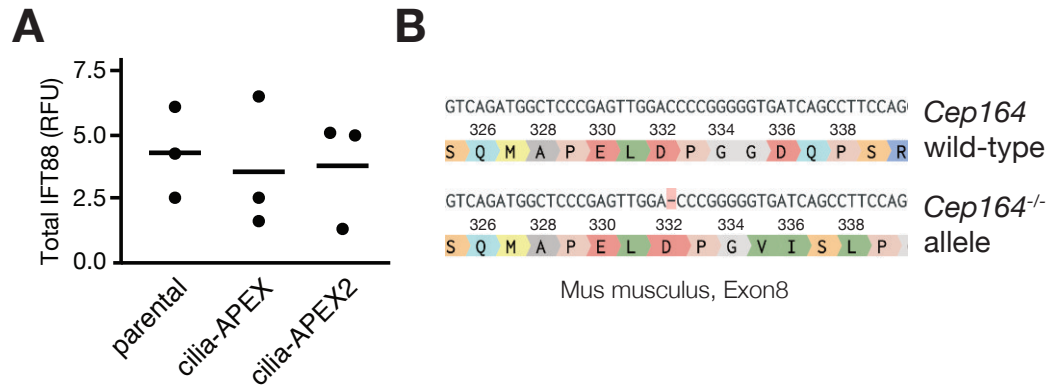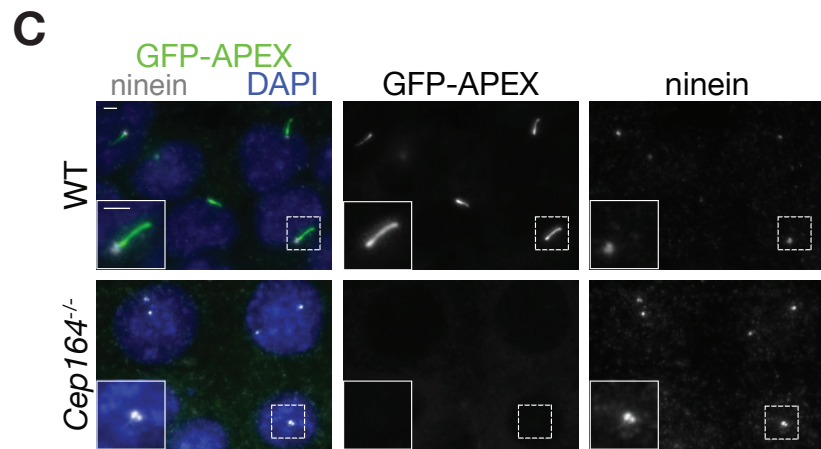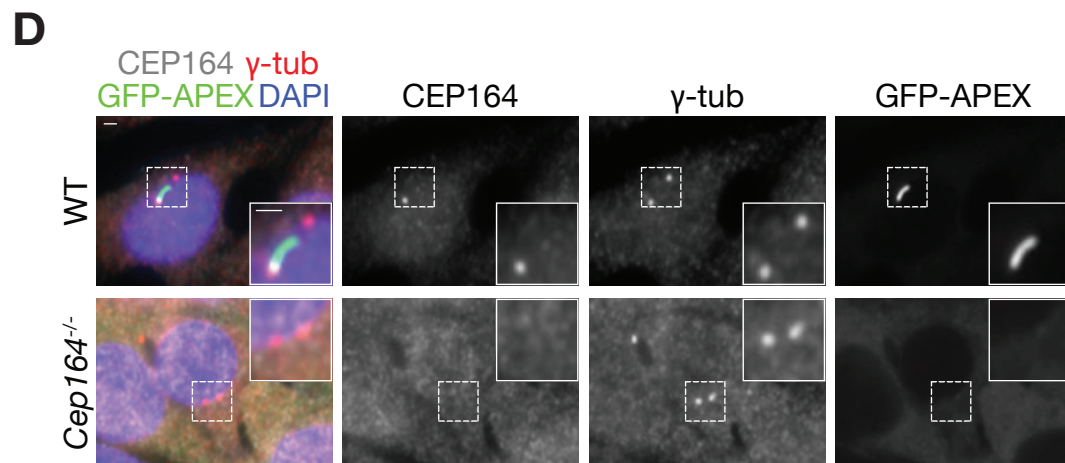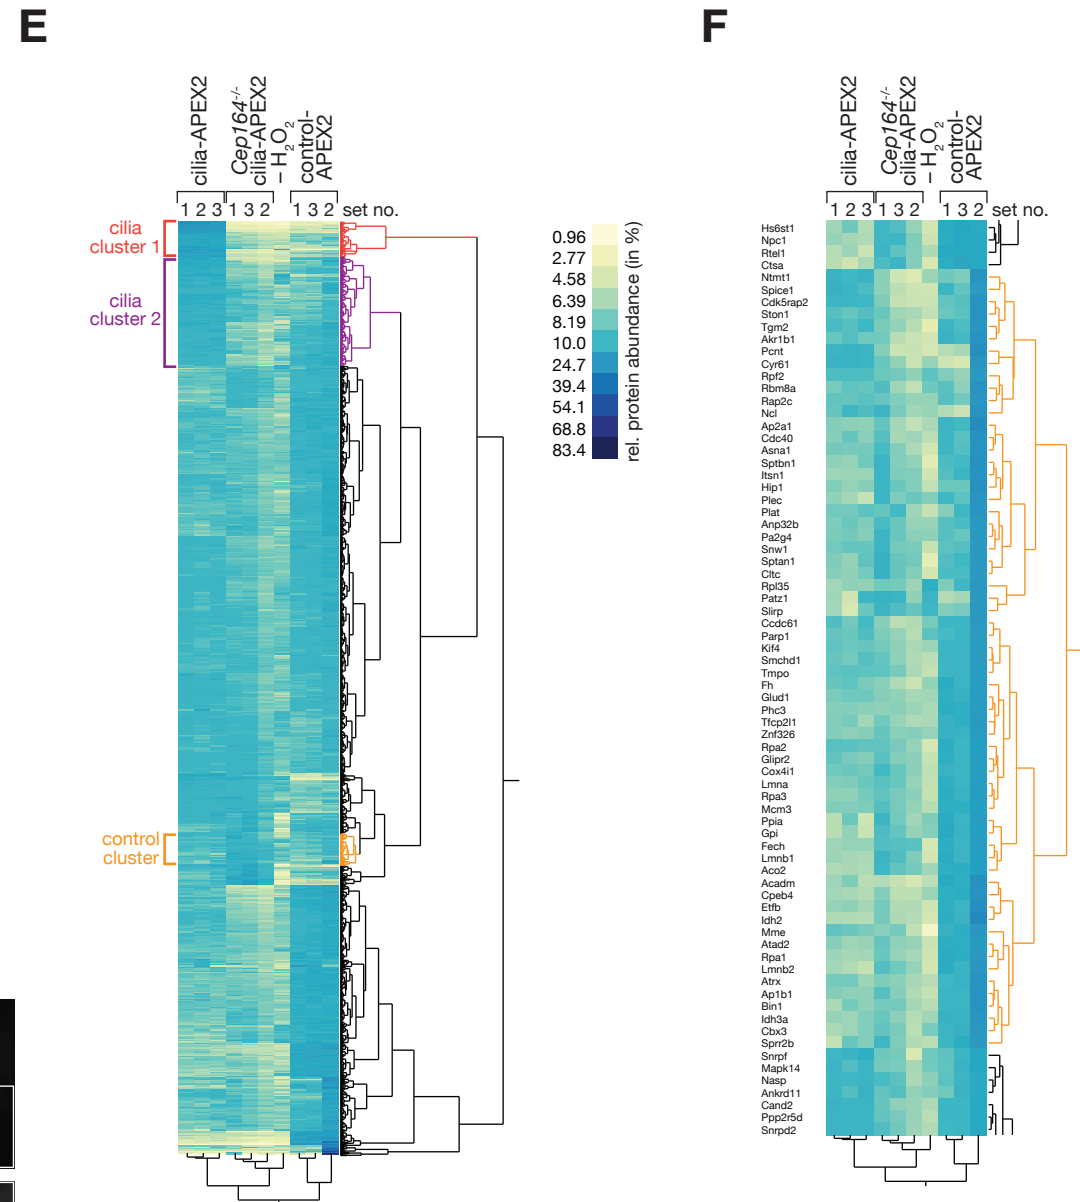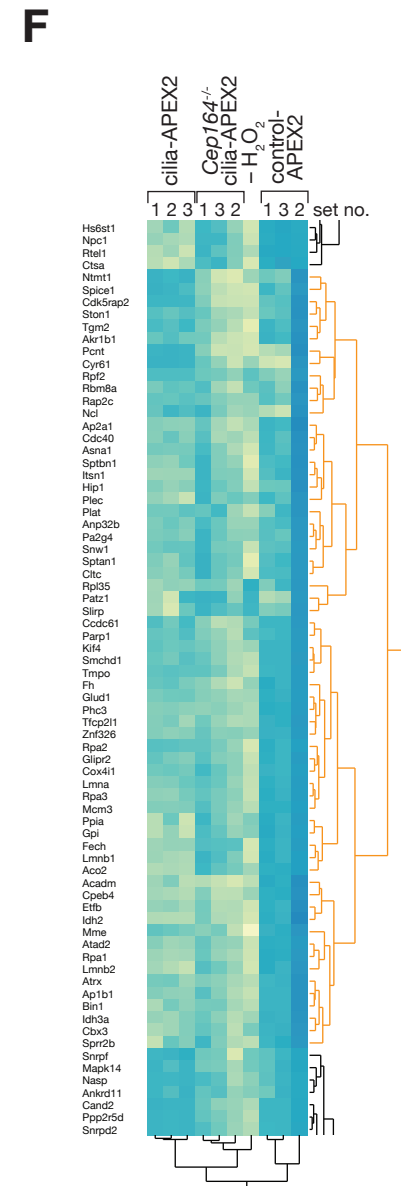

l052 Figure S1. **A CEP164-deficient cilia-APEX2 IMCD3 cell line serves as a specificity control**  
l053 **for cilia-APEX2 proteomics**

l054 **(A)** Dot plot showing total protein levels of IFT88 relative to actin in indicated cell lines as determined  
l055 by quantitative immunoblotting (see Fig. 1E). Mean values are indicated by horizontal lines (n = 3).

l056 **(B)** *Cep164*<sup>-/-</sup> cDNA was sequenced and aligned with the *Cep164* gene sequence from *Mus musculus*. A  
l057 homozygous single base pair deletion in exon 8 leads to a frameshift mutation and protein truncation.  
l058 DNA sequences were analyzed using Benchling.

l059 **(C)** and **(D)** Immunofluorescence micrographs of wild-type (WT) or CEP164-deficient (*Cep164*<sup>-/-</sup>) cell  
l060 lines stably expressing cilia-APEX2. Cell lines were serum-starved for 24 h before fixation. cilia-  
l061 APEX2 proteins were detected by GFP fluorescence. **(C)** Ninein marks centrioles and is visualized by  
l062 antibody staining. **(D)**  $\gamma$ -tubulin and CEP164 are detected by specific antibodies. Representative  
l063 micrographs are shown for each condition. Scale bars represent 2  $\mu$ m.

l064 **(E)** High reproducibility of cilia-APEX2 proteomic setup. Hierarchical cluster analysis based on  
l065 Ward's minimum variance method (two-way clustering) of the relative abundances of each identified  
l066 protein (rows) in the individual samples (columns). Relative scaled abundances were calculated by  
l067 dividing the TMT signal to noise of an individual protein by the sum of TMT signal to noise ratios in  
l068 all samples. Legend depicts color scheme for relative abundances (in %). Brackets indicate cilia clusters  
l069 (red and purple, see Fig. 2B) and unrelated cluster (orange) without cilia proteins.

l070 **(F)** Zoom into hierarchical cluster analysis (E) at control cluster (orange) without cilia proteins.

l071

l072

**A**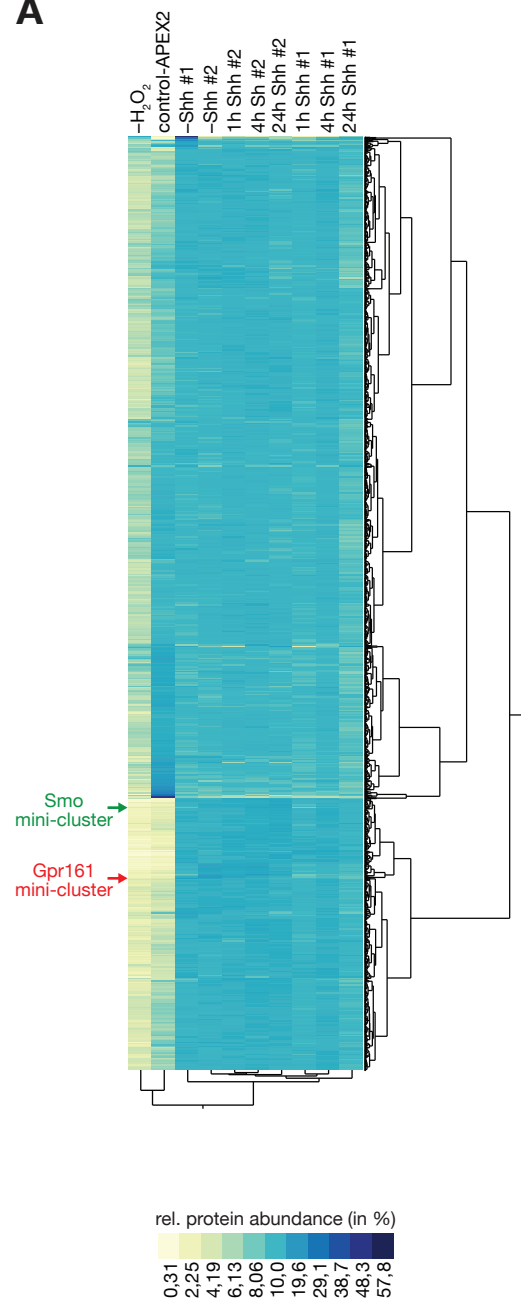**B**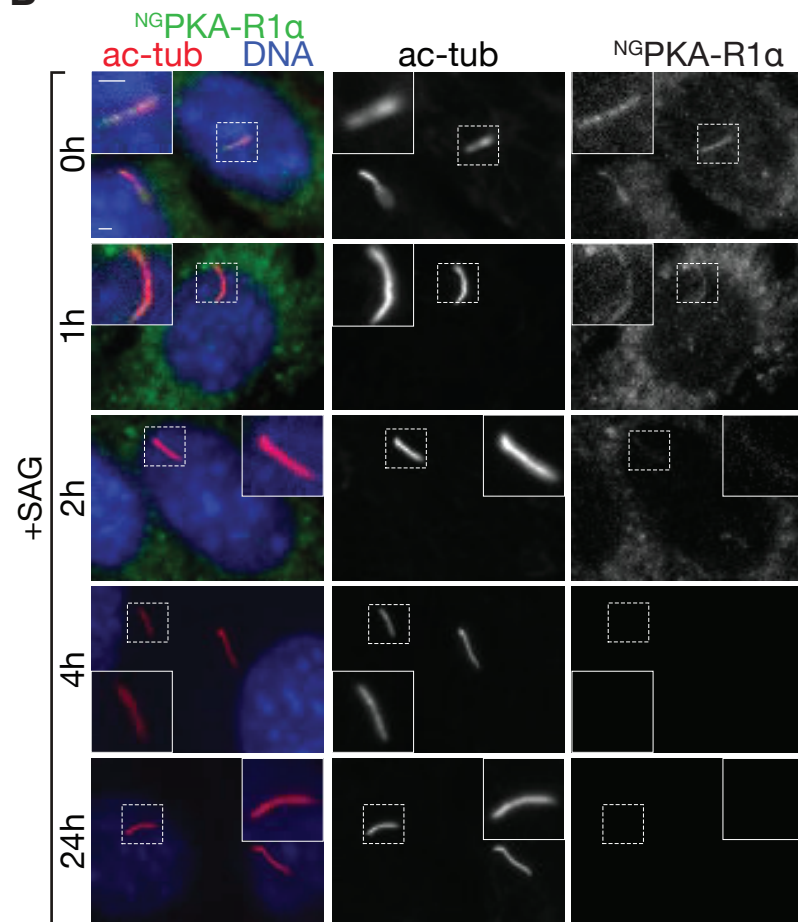**D**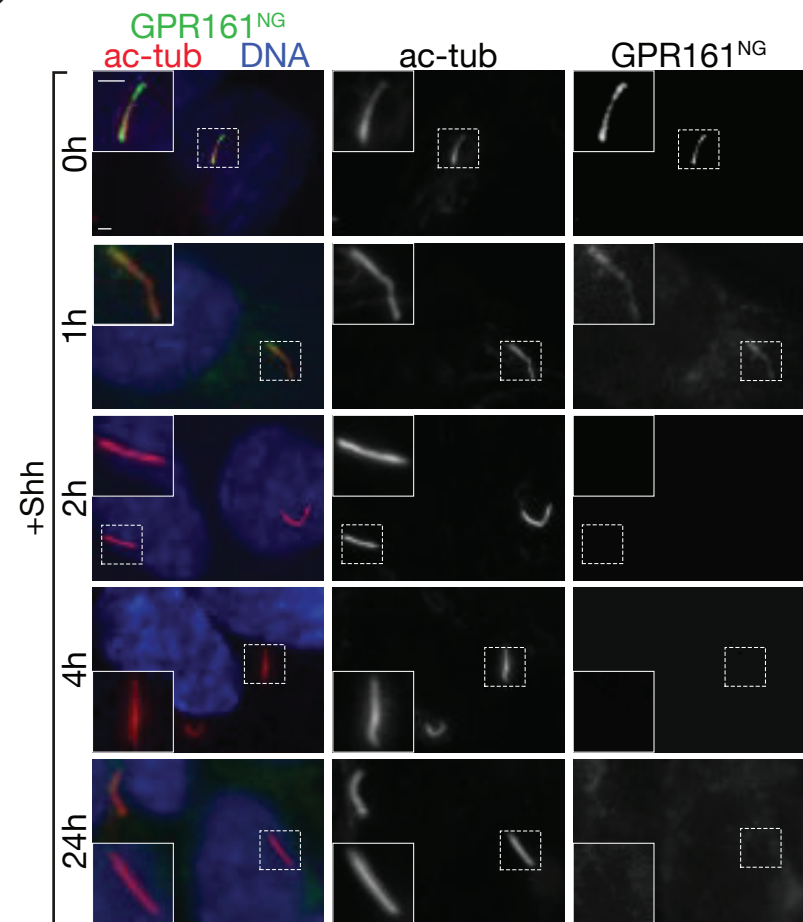**C**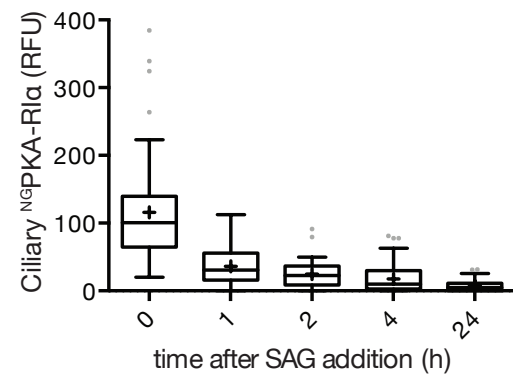**E**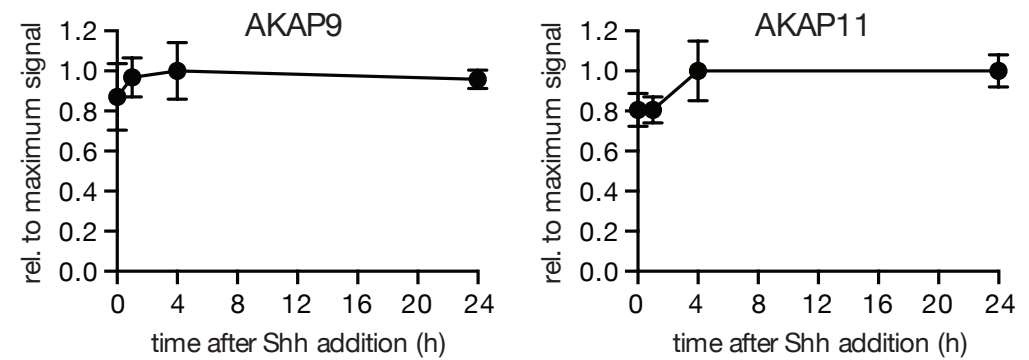

l073 Figure S2. **PKA-RI  $\alpha$  and GPR161 are removed from cilia in response to Smoothened**  
l074 **agonist, while the A-kinase anchoring proteins (AKAPs) identified by cilia-APEX2**  
l075 **remain unchanged.**

l076 **(A)** Two-way hierarchical cluster analysis (Ward's method) of the relative protein abundances (rows)  
l077 in the individual samples (columns) shows high inter-set reproducibility. Legend depicts the color  
l078 scheme of relative abundances (calculated as in Fig. S1E). SMO and GPR161 mini-clusters are  
l079 indicated by green and red arrows, respectively (see Fig. 5A and B for magnified views of the mini-  
l080 clusters).

l081 **(B and C)** <sup>NG</sup>PKA-RI  $\alpha$ -expressing IMCD3 cells were serum-starved for 24 h and treated with or  
l082 without SAG for indicated times. Cells were fixed and stained for ac-tub (red) and DNA (blue). <sup>NG</sup>PKA-  
l083 RI  $\alpha$  was visualized by mNeonGreen fluorescence. Representative micrographs are shown **(B)**. **(C)**  
l084 Box plot shows background-corrected <sup>NG</sup>PKA-RI  $\alpha$  fluorescence in cilia at indicated timepoints after  
l085 SAG addition. 50 cilia (n=50) were analyzed for each time point.

l086 **(D)** IMCD3 cells expressing GPR161<sup>NG</sup> were serum-starved for 24 h in the presence of Shh-  
l087 conditioned medium for indicated times and analyzed as in **(B)**. GPR161<sup>NG</sup> was detected by  
l088 mNeonGreen fluorescence. For quantitative analysis, see Fig. 5F.

l089 **(E)** Relative AKAP abundances assessed by mass-spectrometric TMT quantitation were plotted over  
l090 time. Data points represent averages of duplicate measurements, error bars depict individual values.  
l091 Maximum average signal was set to 1, background signals as assessed from control-APEX2 labeled  
l092 samples set to 0. '0 h' represents -Shh.

l093 Scale bars represent 2  $\mu$ m.

l094

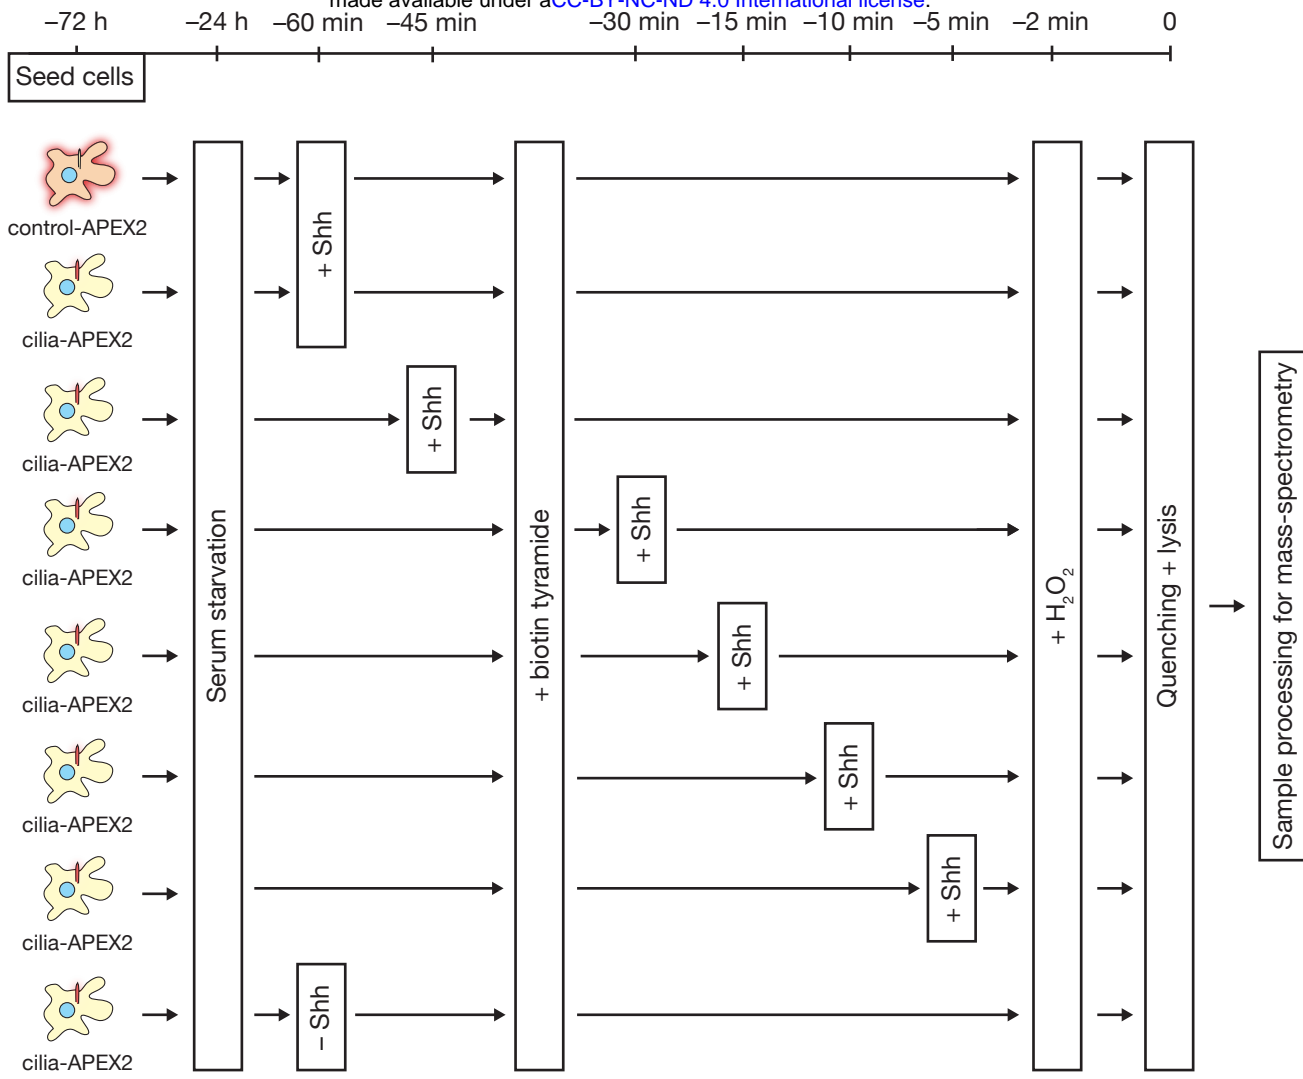

May et al., Figure S3

l095 Figure S3. **Schematic of experimental workflow for high resolution time-resolved cilia-**  
l096 **APEX2 profiling of the ciliary Hh response (see Figure 4C).**

l097 Cilia-APEX2 (and control-APEX2) IMCD3 cells were seeded 72 h before the APEX labeling reaction.  
l098 24 h before labeling, cells were starved of serum. 60 min, 45 min, 30 min, 15 min, 10 min and 5 min  
l099 before APEX-labeling Shh-conditioned medium was added (as indicated). ‘-Shh’ indicates addition of  
l100 conditioned medium without Shh 60 min prior to labeling. APEX labeling and sample preparation  
l101 were performed as in Fig. 2A. In brief, biotin tyramide was added 30 min before the 2 min labeling  
l102 reaction in the presence of hydrogen peroxides (H<sub>2</sub>O<sub>2</sub>). Samples were quenched and kept on ice for  
l103 lysis, followed by streptavidin chromatography and on-bead tryptic digestion. Peptides of each sample  
l104 were labeled with individual tandem-mass-tags (TMTs), pooled and fractionated offline via high pH  
l105 reversed phase chromatography before mass-spectrometric analysis.

l106



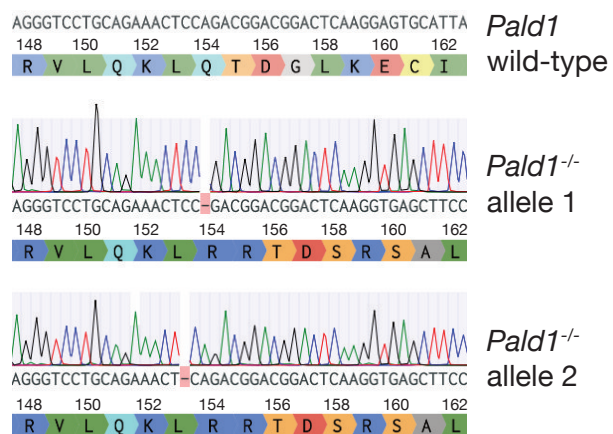

Mus musculus, Exons 4 and 5

l107 Figure S4. ***Pald1*<sup>-/-</sup> IMCD3 cells exhibit early missense mutation.**

l108 *Pald1*<sup>-/-</sup> genomic DNA was sequenced and aligned with the *PALDI* WT gene sequence from *Mus*  
l109 *musculus*. Single base pair deletions in exon 4 lead to frameshift mutations in both alleles and protein  
l110 truncation. The DNA sequences have been analyzed using Benchling.

l111

l112

l113

l114

l115

l116

l117 **SUPPLEMENTARY TABLES**

l118

l119 Table S1. **Cilia-APEX2/TMT proteomics reveals the proteome of primary cilia with high**  
l120 **sensitivity.**

l121 First tab ‘Legend’ shows the color scheme. Second tab ‘cilia-APEX2 TMT - Fig. 2’ enumerates the  
l122 candidate cilia proteins identified by cilia-APEX2/TMT proteomics (see Figs. 2A-D). Proteins are  
l123 listed by Gene symbols according to the *Mus musculus* proteome database (Uniprot 07/2014). Column  
l124 B shows the numbers of quantified peptides. ‘TMT ratio’ in columns C and E is the average relative  
l125 enrichment between three cilia-APEX2 samples and the indicated control samples. *p* values in columns  
l126 D and F were calculated from multiple *t*-tests (statistical significance of enrichments of cilia-APEX2  
l127 samples versus the respective controls determined by unpaired student’s *t*-tests). Third tab ‘known cilia  
l128 proteins below cut’ lists known cilia proteins quantified by cilia-APEX2/TMT proteomics that did not  
l129 meet the inclusion criteria.

l130

l131 Table S2. **Cilia-APEX2 proteome list.**

l132 First tab ‘Legend’ shows the color scheme. Second tab ‘cilia-APEX2 proteome’ lists the high  
l133 confidence cilia proteins that have been scored as hits in three (Tier 1, detailed in third tab) or at least  
l134 two out of three experiments (Tier 2, detailed in fourth tab). The numbers of quantified peptides and  
l135 the average enrichment scores (TMT ratios) in the individual experiments are shown.

## l136 **MATERIALS AND METHODS**

### l137 **Cell line generation, cultivation and manipulation**

l138 C2C12 myoblasts, NIH 3T3 and HEK cells were cultured in DMEM medium, RPE1-hTERT  
l139 (described as RPE in the text) and all IMCD3 cell lines were grown in DMEM/F12, all supplemented  
l140 with 10% FBS. The pancreatic beta cell line MIN6 was cultured in DMEM medium, supplemented  
l141 with 15 % FBS. Ciliation was induced by growth factor deprivation by reducing the growth media to  
l142 0.2% FBS for 24 h. Transfections were carried out using XtremeGene9 (Roche) or FuGene6 (Promega)  
l143 according to manufacturers' guidelines. *Cep164* and *Pald1* genes were disrupted in IMCD3 FlpIn cells  
l144 using CRISPR/Cas9-mediated genome editing with gRNAs targeting exons 8 and 4, respectively (Ran  
l145 et al., 2013). Clones of each cell line were obtained by limited dilution (*Cep164*) or single cell sorting  
l146 (*Pald1*). Clones with disrupted genes were screened by immunofluorescence microscopy and Western  
l147 Blotting using protein-specific antibodies. Selected positive clones were further characterized by  
l148 sequencing, confirming missense mutation leading to early termination of translation.

l149 IMCD3 cell lines stably expressing cilia-APEX2, control-APEX2, <sup>NG</sup>PKA-RI  $\alpha$  were generated using  
l150 the FlpIn system as described (Breslow and Nachury, 2015). Plasmids encoding cilia-APEX2 and  
l151 control-APEX2 were created by site-directed mutagenesis of cilia-APEX and control-APEX plasmids,  
l152 and confirmed by sequencing. A plasmid encoding <sup>NG</sup>PKA-RI  $\alpha$  was generated using the Gateway  
l153 cloning system (Life technologies) by LR clonase reaction of pEF5/FRT/NG-DEST with pENTR-  
l154 PRKAR1A (obtained from Addgene, #23741). IMCD3 cells stably expressing GPR161<sup>NG</sup> have  
l155 previously been described (Ye et al., 2018).

l156 To induce Hh signaling, growth media were supplemented with either 200 nM Smoothened agonist  
l157 (SAG) or Shh-N conditioned medium (10-16% (v/v) depending on batch) produced with EcR-ShhN  
l158 cells (gift from Phil Beachy). To block Hh signaling, cyclopamine (CYC) was added to the growth  
l159 medium to a final concentration of 10  $\mu$ M.

l160

### l161 **APEX labeling experiments**

l162 Cells were incubated in the presence of 0.5 mM biotin tyramide for 30 min before the addition of  
l163 hydrogen peroxide (H<sub>2</sub>O<sub>2</sub>) to a final concentration of 1 mM. For non-labeling samples water was added  
l164 instead of H<sub>2</sub>O<sub>2</sub>. After 2 min of incubation at room temperature, the medium was aspirated quickly  
l165 and cells were washed three times with quenching buffer (1x PBS supplemented with 10 mM sodium  
l166 ascorbate, 10 mM sodium azide and 5 mM Trolox). For fluorescence microscopy, cells were  
l167 immediately fixed. For proteomic and Western Blot analyses cells were lysed by scraping them off the  
l168 growth surface in ice-cold lysis buffer (0.5 % (v/v) Triton X-100, 0.1 % (w/v) SDS, 10% (w/v) glycerol,

l169 300 mM NaCl, 100 mM Tris/HCl pH 7.5, protease inhibitors) supplemented with 10 mM sodium  
l170 ascorbate, 10 mM sodium azide and 5 mM Trolox. After collecting the lysate in a reaction tube, the  
l171 lysate was vortexed, incubated on ice for 15 min and cleared by centrifugation (16,000 x g for 20 min  
l172 at 4°C).

l173

### l174 **Streptavidin chromatography**

l175 After determining protein concentrations of lysates from APEX-labeling experiments they were  
l176 adjusted to equal concentrations and volumes as starting material for chromatography, from which  
l177 samples were taken as loading control for SDS-PAGE and Western Blot analysis. Samples were added  
l178 onto washed and equilibrated Streptavidin-Sepharose beads (Thermo Scientific) and biotinylated  
l179 proteins were allowed to bind for 1 h at room temperature. Unbound material was removed and  
l180 samples taken for Western Blot analysis. Beads with bound proteins were washed extensively with lysis  
l181 buffer, then with urea wash buffer (4 M urea 10 mM Tris/HCl, pH 7.5) and finally with urea wash  
l182 buffer supplemented with 50  $\mu$ M biotin. For mass-spectrometric analyses, bound proteins were  
l183 alkylated and digested with endopeptidase Lys-C (Wako) for 3 hours and trypsin (Promega) on beads  
l184 overnight at 37°C.

l185

### l186 **Mass spectrometry**

l187 Tryptic digests were directly labelled in 200 mM HEPES pH 8.5 with tandem mass tag (TMT) 10-  
l188 plex reagents (Thermo Fisher Scientific #90406). After efficient labeling was checked by MS, peptides  
l189 were subjected to alkaline reversed phase fractionation as described (Paek et al., 2017). Pooled fractions  
l190 were analyzed on a Fusion Lumos Orbitrap mass spectrometer coupled to a Proxeon EASY-nLC 1000  
l191 liquid chromatography (LC) system (Thermo Fisher Scientific) using a synchronous precursor selection  
l192 (SPS) MS<sup>3</sup> method (McAllister and Gygi, 2013). Capillary columns had an inner diameter of 100  $\mu$ m  
l193 and were packed with 2.6  $\mu$ m Accucore beads (Thermo Fisher Scientific). Peptides were analyzed on  
l194 acidic acetonitrile gradients for 5 h with MS<sup>1</sup> (Orbitrap, resolution 120k) scans, MS<sup>2</sup> scans after  
l195 collision-induced dissociation (CID, CE-35) in the ion trap and MS<sup>3</sup> precursor fragmentation by high-  
l196 energy collision-induced dissociation (HCD). Reporter ions were analyzed by MS<sup>3</sup> in the orbitrap at a  
l197 resolution of 50k. Further details on LC and MS parameters can be found in (Paek et al., 2017).

l198

### l199 **Mass spectrometry data analysis**

l200 Mass spectra were processed and peptide-spectrum matches (PSM) were obtained by a SEQUEST  
l201 (V.28, rev. 12) based software. Searches used a size-sorted forward and reverse database of the *M.*  
l202 *musculus* proteome (Uniprot 07/2014) with a mass tolerance of 20 ppm for precursors and a fragment

l203 ion tolerance of 0.9 Da. Oxidized methionine residues were dynamically searched (+15.9949 Da). A  
l204 false discovery rate of 1% was set for PSM following linear discriminant analysis and FDR for final  
l205 collapsed proteins was 1% as well.

l206 Relative protein quantification used summed MS<sup>3</sup> TMT signal / noise (s/n) per protein filtered for  
l207 summed s/n >180 over all channels per peptide and an isolation specificity >70% for each peptide.

l208 Details of the TMT intensity quantification method can be found in (Paulo et al., 2016).

l209

### l210 **Immunofluorescence microscopy**

l211 For microscopic analyses all cells were grown on round 12 mm #1.5 coverslips and fixed in 4%  
l212 paraformaldehyde for 10 to 15 min at room temperature. After fixation cells were permeabilized in -  
l213 20°C methanol for 5 min and rehydrated in 1x PBS at room temperature. After extensive washing in  
l214 1x PBS, fixed cells were blocked in blocking buffer (3% bovine serum albumin, 5% serum in 1x PBS)  
l215 for 30 min. After blocking, cells were incubated with primary antibody dilutions in blocking buffer for  
l216 1 h at room temperature or 4°C overnight, washed three times with 1x PBS over 15 minutes, and  
l217 incubated with AlexaFluor488-, Cy3- or Cy5-coupled secondary antibodies (Jackson  
l218 Immunoresearch), or AlexaFluor647-conjugated streptavidin (Invitrogen) in blocking buffer for 30  
l219 min. Finally, cells were washed five times in PBS and mounted on glass slides using Roti®-Mount  
l220 FluorCare DAPI (Carl Roth; Figs. 1, 6C, 6D, 7 and 8) or DNA stained with Hoechst 33258 and  
l221 mounted on glass slides using Fluoromount G (Electron Microscopy Sciences; Figs. 5, 6E, 6G, S1).  
l222 APEX enzymes and YFP<sup>SMO</sup> were detected by GFP and YFP fluorescence, <sup>NG</sup>PKA-RI $\alpha$  and  
l223 GPR161<sup>NG</sup> by mNeonGreen fluorescence.

l224 Prepared specimens were imaged on an AxioImager.M1 microscope (Carl Zeiss, Figs. 5C, 5E, 5G) or  
l225 a Leica DMi8 with PlanApochromat oil objectives (63x, 1.4NA) using appropriate filters. Images were  
l226 captured using a CoolSNAP HQ (Photometrics) or Leica DFC3000 G camera system, respectively.

l227

### l228 **SDS-PAGE and Western Blotting**

l229 Standard techniques were used for SDS-PAGE and Western blotting. Cell lysates were generated after  
l230 washing cells with 1x PBS and scraping cells of the growth surface in solubilization buffer (25 mM  
l231 Tris/HCl, 300 mM NaCl, 1 mM EDTA, 10 % Glycerol, 1 % Triton X-100 (v/v), 0.1 % SDS (w/v),  
l232 1 mM PMSF and proteinase inhibitors (Roche)). Lysates were cleared by centrifugation (20.000 g at  
l233 4°C for 45 min), 25  $\mu$ g of protein was separated on 10% Bis-Tris polyacrylamide gels and transferred  
l234 onto nitrocellulose membranes. After blocking in 5% milk or Intercept® (TBS) Protein-Free Blocking  
l235 Buffer (LI-COR) and specific antibody decoration, membranes were washed and primary antibodies  
l236 visualized using IRDye800-conjugated and IRDye680-conjugated secondary antibodies on a LI-COR



l237 Odyssey laser scanner. Quantitation of bands was performed using the Image Studio Lite software  
l238 (version 5.2.5).

l239

### l240 **Statistical analyses**

l241 Statistical analyses were performed with Graphpad Prism v8.3.1. For Western Blot analyses mean  
l242 values from independent experiments (exact n stated in figure legend) were calculated and are shown  
l243 with either SD or SEM as described in the figure legends. For GLI3 analysis, each experiment was  
l244 internally normalized to the GLI3<sup>FL</sup>/GLI3<sup>R</sup> ratio in WT cells in the absence of Shh-N. For  
l245 Immunofluorescence experiments at least 30 cilia were analyzed (exact n stated in figure legends). To  
l246 compare biological replicates, relative fluorescence values were normalized to the average relative  
l247 fluorescence signal in WT cells in the absence of inducing reagents. In all statistically analyzed  
l248 experiments, significance was assessed by two-way ANOVA assuming normal distribution and  
l249 multiplicity adjusted p-values were obtained by Holm-Sidak post-hoc or Tukey testing (p<0.05 was  
l250 considered statistically significant). For volcano plot graphs, Student's t-test were used and statistical  
l251 analyses were performed using Prism 8 (Graphpad Software). Hierarchical cluster analyses were  
l252 performed according to Ward's minimum variance method using JMP software (from Statistical  
l253 Analysis System, v15.1.0).

l254

### l255 **Antibodies and reagents**

l256 Antibodies against the following proteins were used at indicated dilutions: anti-acTub (Sigma-Aldrich  
l257 T7451, mouse 1:2,000), anti-Arl13b (Proteintech 17711-1-AP, rabbit 1:2,000), anti-IFT88  
l258 (Proteintech 13967-1-AP, rabbit 1:200 in IF, 1:1,000 in WB), anti-GFP (raised against 6His-tagged  
l259 eGFP, rabbit 1:1,000), anti-GPR161 (gift from S. Mukhopadhyay, rabbit 1:500), anti-GLI3 (R&D  
l260 Systems nachuryAF3690, goat 1:1,000) anti-actin (self-made, rabbit 1:5,000), anti-GAPDH  
l261 (Proteintech 60004-1-Ig, mouse 1:2,000), anti-PALD1 (Sigma-Aldrich HPA017343, rabbit, IF: 1:250,  
l262 WB: 1:1,000), anti-SMO (Santa Cruz sc-166685, mouse IgG2a in IF 1:200; Abcam ab236465 for Figs.  
l263 5B, D and E), anti-PTCH1 (Abcam ab53715, rabbit, WB 1:1,000), anti-ninein (gift from M. Bornens,  
l264 rabbit 1:10,000), anti-CEP164 (gift from C. Morison, rabbit, IF 1:2,000),  $\gamma$ -tubulin (Proteintech 66320-  
l265 1-AP, rabbit 1:1,000). Streptavidin-pHRP (Thermo Scientific #21140, 1:1,000), Streptavidin-AF647  
l266 (Invitrogen S21374, 1:1,000), Smoothened agonist (SAG; Abcam ab142160), Shh (N-terminus of Shh,  
l267 produced in cell line EcR-ShhN cells, gift from Phil Beachy), cyclopamine (CYC; Merck Millipore  
l268 #239806), biotin tyramide (Iris Biotech GmbH), somatostatin (sst; Alfa Aesar J66168).

l269

l270

1271 **Cell lines used in this study**

| <b>Cell line</b>                         | <b>Parental cell line</b> | <b>reference</b>          |
|------------------------------------------|---------------------------|---------------------------|
| <i>Cep164</i> <sup>-/-</sup>             | IMCD3 FlpIn               | This work                 |
| <i>Pald1</i> <sup>-/-</sup>              | IMCD3 FlpIn               | This work                 |
| Cilia-APEX2                              | IMCD3 FlpIn               | This work                 |
| Control-APEX2                            | IMCD3 FlpIn               | This work                 |
| <i>Cep164</i> <sup>-/-</sup> cilia-APEX2 | IMCD3 FlpIn               | This work                 |
| <sup>NG</sup> PKA-RI $\alpha$            | IMCD3 FlpIn               | This work                 |
| GPR161 <sup>NG</sup>                     | IMCD3 FlpIn               | (Nager et al., 2017)      |
| SSTR3 <sup>NG</sup>                      | IMCD3 FlpIn               | (Nager et al., 2017)      |
| <sup>YFP</sup> SMO                       | 3T3                       | (Milenkovic et al., 2009) |
| C2C12                                    | -                         | (Blau et al., 1985)       |
| RPE1-hTERT                               | -                         | (Bodnar et al., 1998)     |
| MIN6                                     | -                         | (Poitout et al., 1995)    |

1272
